# Supplementary material for: Thermodynamics control precipitation in NE Mexico on orbital to millennial timescales
Source: Research Square preprint supplement (doi:10.21203/rs.3.rs-611282/v1), 2021-06-22
Supplement: Supplementary file 1 [file ae3452bfc7d72e71e5865ad1.pdf]

Supplementary Materials for:

**Thermodynamics control precipitation in NE Mexico on orbital to millennial timescales**

Kevin T. Wright<sup>1\*</sup>, Kathleen R. Johnson<sup>1</sup>, Gabriela Serrato Marks<sup>2</sup>, David McGee<sup>2</sup>, Tripti Bhattacharya<sup>3</sup>, Gregory R. Goldsmith<sup>4</sup>, Clay R. Tabor<sup>5</sup>, Jean-Louis Lacaille-Muzquiz<sup>6</sup>, Gianna Lum<sup>1</sup>, Laura Beramendi-Orosco<sup>7</sup>

\*Corresponding author. Email: [ktwright@uci.edu](mailto:ktwright@uci.edu) (K.T.W.)

**This .docx file includes:**

The attached supplementary materials .docx file includes:

Methods

Fig. S1. Modern precipitation patterns of NE Mexico.

Fig. S2. Isotopic composition of precipitation.

Fig. S3. Cave temperature, relative humidity from 2017-2020.

Fig. S4. CB2  $\delta^{18}\text{O}$  compared to various seasons of insolation.

Fig. S5. Summer and winter low level winds during the Last Glacial Maximum, Mid-Holocene and Pre-Industrial Period.

Fig. S6. Summer and winter precipitation during the Last Glacial Maximum, Mid-Holocene and Pre-Industrial Period.

Fig. S7. Precipitation and soil-moisture comparison between the Pre-Industrial to Last Glacial Maximum.

Fig. S8. Comparison of raw CB2  $\delta^{18}\text{O}$  with mean-seawater subtracted CB2  $\delta^{18}\text{O}$ .

Table S1. Uranium-thorium data for Stalagmite CB2.

Table S2: Precipitation from Alta Cima, Mexico and cave water  $\delta^{18}\text{O}$  and  $\delta\text{D}$  data.

Table S3: CB2 Speleothem  $\delta^{18}\text{O}$ ,  $\delta^{13}\text{C}$  and Mg/Ca ratios.

## Cave setting and speleothem sample

Cueva Bonita (23°N, 99°W; 1071 m above sea level) is located in the highlands of the Sierra Madre Oriental in the northeast Mexican state of Tamaulipas (Fig. S1). Regional geology is dominated by thick (>2000 m) Lower Cretaceous limestone (Gary and Sharp, 2006), uplifted by normal and thrust faults (Ford, 2000). The cave has ~20-25 m of overburden, a single relatively narrow entrance, and a shallow soil profile with 30 cm of dark brown clay loam soil. The vegetation above the cave is dominated by C<sub>3</sub> plants, including the *Podocarpus reichei*, *Liquidambar styraciflua*, *Quercus sartorii*, *Quercus germana*, *Clethra pringlei*, *Magnolia tamaulipana*, *Acer skutchii*, *Cercis canadensis*, and diverse epiphytic orchid species. The cave resides within the northernmost tropical cloud forest, with an annual mean precipitation of 1800 mm/yr (Grams & Faaborg, 1997) and annual mean exterior temperature of 23.3°C (Fig. S1).

An ongoing cave monitoring campaign has been conducted to better understand how the overlying climate is recorded in speleothem calcite. Relative humidity and temperature fluctuations have been monitored using an Onset HOBO Relative Humidity-Temperature logger, collecting data every 2 hours. Additionally, daily CO<sub>2</sub> measurements were made using a handheld Vaisala GM-70 CO<sub>2</sub> monitor attached to a 12 Volt lantern battery, which typically lasted 1-3 months. Over a 27-month period, relative humidity remained constant at 100% (Fig. S6). The temperature varied only slightly from the mean of 17.5°C with a subtle drop (< 0.5°C) during boreal winter (Fig. S6). These stable conditions suggest calcite was likely deposited in isotopic equilibrium and is therefore reflective of the isotopic composition of precipitation. Monitoring revealed a seasonal cycle in cave pCO<sub>2</sub>, ranging from atmospheric concentrations (~400 ppm) during winter, upwards to 1251 ppm during the warmer summer months (Fig. S6). This change in pCO<sub>2</sub> suggests there is likely a seasonal cyclicity in speleothem δ<sup>13</sup>C as has been shown in other studies on the effects of changing cave ventilation on speleothem chemistry (Frisia et al., 2011). This ventilation related fractionation is not likely to significantly impact speleothem δ<sup>13</sup>C variations on interannual timescales or longer.

Stalagmite CB2 was collected on a slope approximately 30 meters from the cave entrance on a second level, approximately 15 meters below the first level. Stalagmite CB2 was inactive when collected, but drip water was collected from around the sample in spring 2016 and 2017. Drip waters demonstrate an average δ<sup>18</sup>O of  $-4.17 \pm 0.9$  ‰ (n=15) similar to the annual average δ<sup>18</sup>O of overlying precipitation samples collected in 2018 (mean =  $-3.97 \pm 2.7$ , n=48). CB2 is a 78 cm long stalagmite composed of translucent grey and beige calcite. No acicular patterns were detected by hand lens, and XRD analysis conducted at ~ 15cm intervals showed CB2 is 100% calcite. CB2 exhibits a predominantly aggregational stratigraphic stacking pattern as well as a globular morphostratigraphic units throughout, suggesting relatively consistent drip rates and calcite saturation (Martín-Chivelet et al., 2017). The speleothem sampled is 100% calcite and temperatures remain relatively constant throughout time, therefore we assume δ<sup>18</sup>O variations are dominantly driven by changes in precipitation δ<sup>18</sup>O.

## Interpretation of geochemical proxies

During periods of reduced local water balance (i.e. reduced water in the critical zone, PET), Prior Calcite Precipitation is enhanced due to an increase in air-filled voids on the cave-ceiling, in the epikarst, and overlying soil (26). Air-filled voids have reduced  $p\text{CO}_2$  in comparison to infiltrating water, which enhances  $\text{CO}_2$  degassing and the precipitation of calcite (27). Enhanced  $\text{CO}_2$  degassing leads to the preferential loss of  $^{12}\text{C}$  in the percolating waters, increasing the  $\delta^{13}\text{C}$  values in the remaining solution and speleothem. Additionally, when calcite precipitates it preferentially uptakes  $\text{Ca}^{2+}$  leaving the remaining solution and speleothem enriched in the divalent ions ( $\text{Mg}^{2+}$ ,  $\text{Sr}^{2+}$ ,  $\text{Ba}^{2+}$ ). Therefore, we interpret the covariation in  $\delta^{13}\text{C}$  and Mg/Ca in our record to be reflective of prior calcite precipitation, primarily controlled by local water balance, not necessary precipitation amount. It is important to note during the transition out of the Pleistocene the increasing trend in Mg/Ca is anomalous compared to  $\delta^{13}\text{C}$  ( $r = 0.14$ ,  $p = 0.04$ ) and  $\delta^{18}\text{O}$ , suggesting trace elements do not match our other proxies on orbital timescales.

Mg/Ca values diverge from the stable isotope record during the glacial-interglacial transition, with an increase from mean glacial concentrations of 30 mmol/mol to Holocene concentrations of ~40 mmol/mol (Fig. 2). The increase in Mg/Ca ratios could be reflective of dryer conditions during the Holocene, however, we interpret the rise in Mg/Ca ratios as a result of non-hydrologic controls on speleothem trace element ratios. During the glacial, we find overall agreement between Mg/Ca and  $\delta^{13}\text{C}$ , indicative that hydrologically sensitive PCP is likely an important controlling mechanism especially on millennial timescales. The divergence between these proxies during the deglacial and Holocene, however, may be explained by the competing influence of temperatures on Mg partitioning into calcite. Cave temperatures are reflective of mean annual surface temperatures (28), therefore as temperatures increased from the glacial through mid-Holocene the temperature dependent partition coefficient for Mg was likely affected (29). If we assume a 5°C interglacial-glacial temperature correction for Mg/Ca, modeling studies demonstrate this change could impart up to a 23% increase in Mg/Ca (29), consistent with the observed shift in CB2.

## Modern Precipitation Isotope Systematics

All precipitation samples collected from June 2018 to May 2019 fall on the Global Meteoric Water Line with  $\delta^{18}\text{O}$  values ranging from -14.03‰ to 0.22‰ and  $\delta\text{D}$  values ranging from -98.3‰ to 6.7‰ (VSMOW) (Fig. S4). In total 48 samples were collected and the mean  $\delta^{18}\text{O}_{\text{precip}}$  is  $-3.97 \pm 2.7\text{‰}$ . Monthly-averaged precipitation amount from a nearby weather station and  $\delta^{18}\text{O}$  values demonstrate a strong correlation ( $r^2 = 0.88$ ) (Fig. S4), suggesting that precipitation  $\delta^{18}\text{O}$  is reflective of precipitation amount on seasonal timescales. However, these

results do not directly confirm the dominance of the amount effect on interannual or longer timescales, and we cannot rule out additional influence of other factors, such as moisture source region, which could enhance or diminish this signal. HYSPLIT analyses, however, demonstrate that the moisture at our field site is dominantly sourced from the Gulf of Mexico and Caribbean Sea (Fig. S1). Even during boreal winter, the Pacific contributes a relatively insignificant amount of moisture ( $< 5$  g/kg m/s). Paleoclimate model simulations (MIROC-ESM, CNRM-CM5, MPI-ESM-P, GISS-E2-R) conducted as part of the Paleoclimate Model Intercomparison Project 3 (PMIP3) (Braconnot et al., 2012) do not demonstrate any major re-organization of wind patterns or changes in seasonality of precipitation (JJAS still dominant) during the mid-Holocene and Last Glacial Maximum (Fig. S2, Fig. S3). To investigate interannual  $\delta^{18}\text{O}$  variability, we analyzed results from the reanalysis nudged isotope enabled IsoGSM model (Yoshimura et al., 2008) for our study region. A spatial correlation between annual precipitation  $\delta^{18}\text{O}$  from IsoGSM with GPCP v.7 precipitation (Fig. S4) shows a clear negative correlation over NE Mexico, further supporting interpretation of  $\delta^{18}\text{O}$  primarily as a rainfall amount signal. Therefore, we conclude that precipitation, and hence stalagmite,  $\delta^{18}\text{O}$  at our site is likely reflective of local and regional precipitation amount rather than changes in moisture source.

### Correction for Seawater $\delta^{18}\text{O}$

The ultimate moisture source of any precipitation is seawater. In order to correct precipitation for glacial-interglacial shifts in  $\delta^{18}\text{O}_{\text{sw}}$ , we subtracted interpolated  $\delta^{18}\text{O}_{\text{sw}}$  values (Waelbroeck et al., 2002) from CB2 data (Fig. S7). This ultimately decreases glacial-interglacial  $\delta^{18}\text{O}_{\text{speleothem}}$  values but does not play a huge role in mitigating or amplifying millennial scale variability.

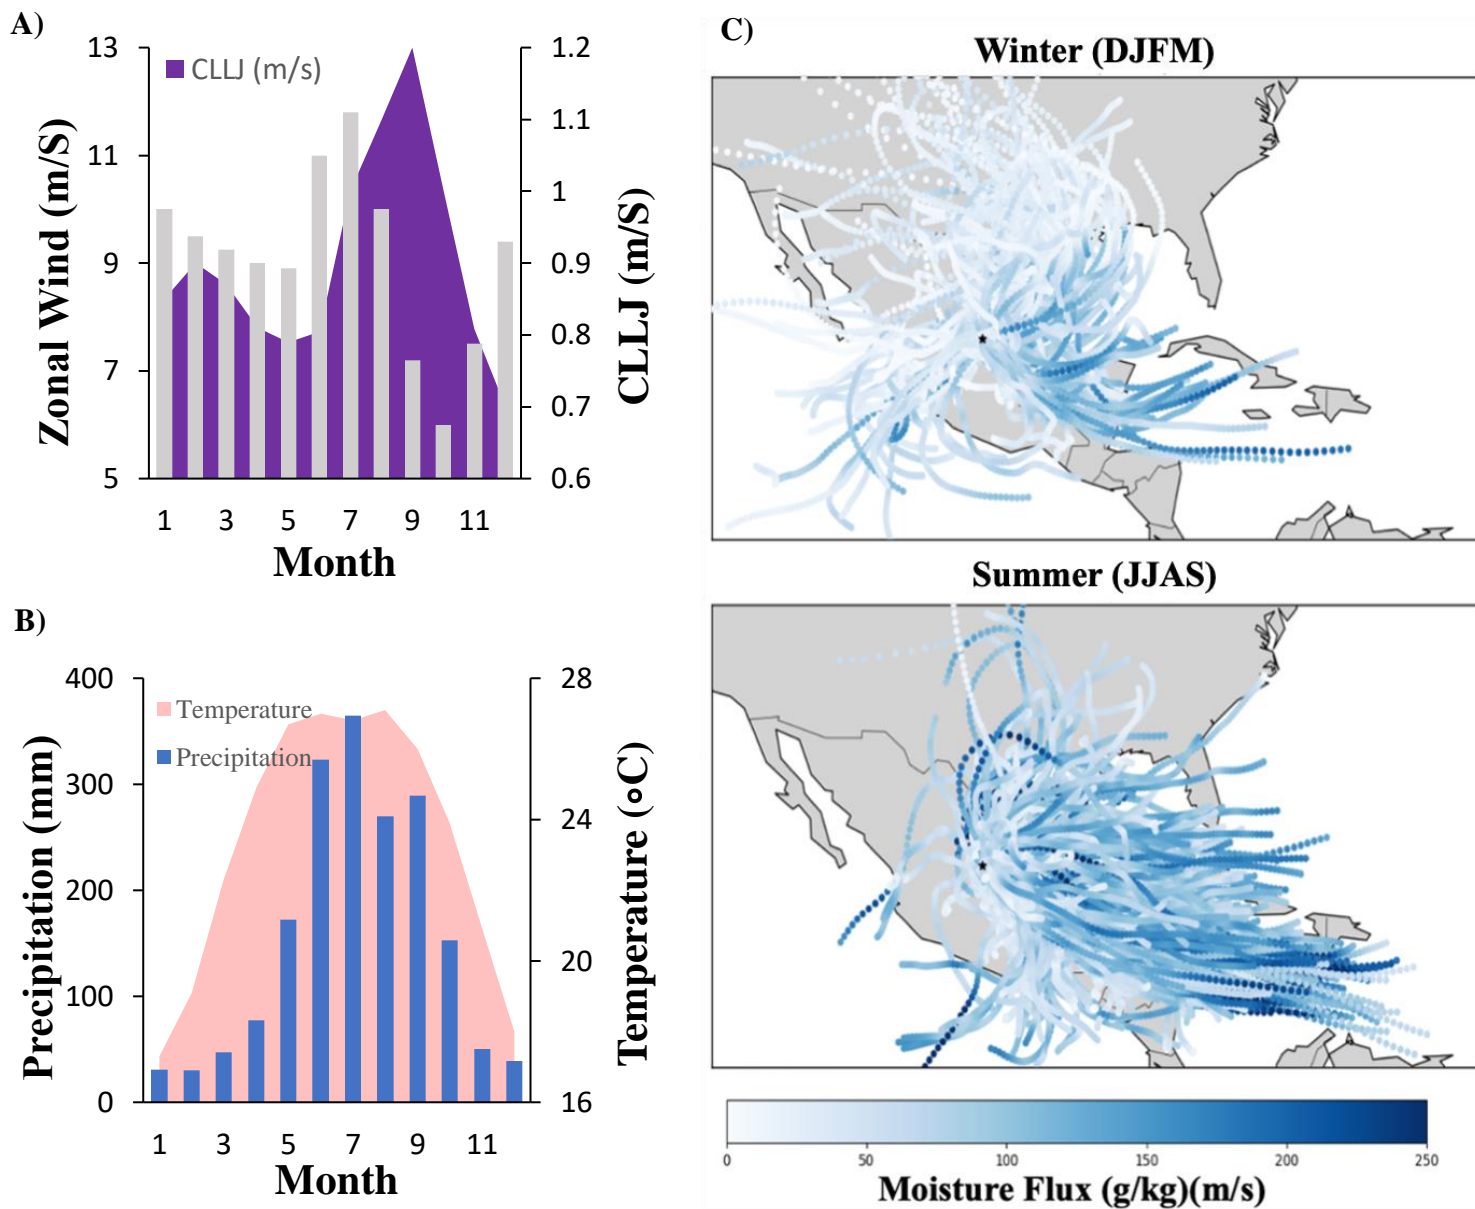

**Fig. S1. Modern precipitation patterns of NE Mexico.** A) Monthly average precipitation and temperature above cave site from [www.weatherbase.com](http://www.weatherbase.com). B) Monthly average zonal winds in the Caribbean Basin and strength of Caribbean Low-Level Jet (Mestas-Nuñez et al., 2007). C) Moisture flux trajectory analysis conducted with NOAA HYSPLIT model (Stein et al., 2015) in conjunction with the python package PYSPLIT (Cross, 2015) for increased computational efficiency. Back-trajectory air trajectories yielding moisture at Cueva Bonita (n=3600) demonstrate the dominant moisture source is from the Gulf of Mexico and Caribbean Sea during both boreal winter and summer.

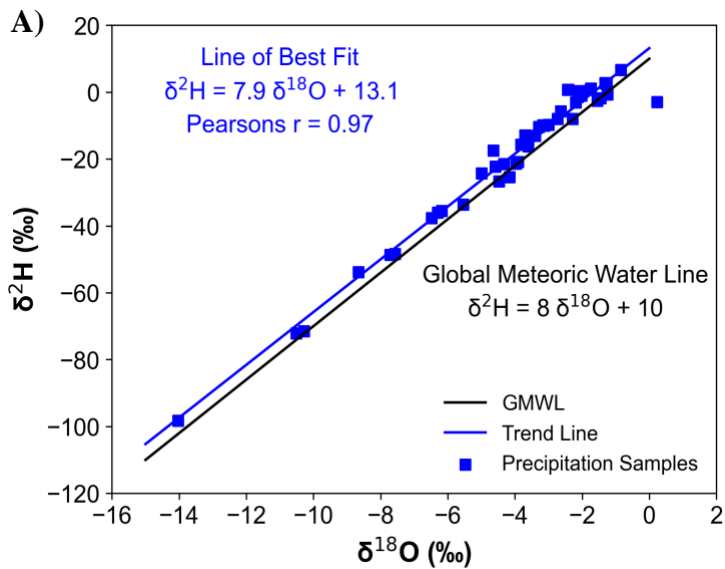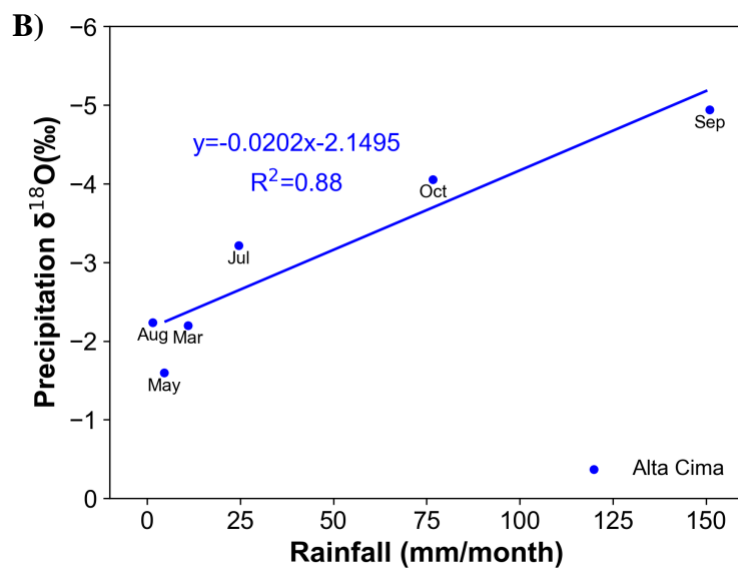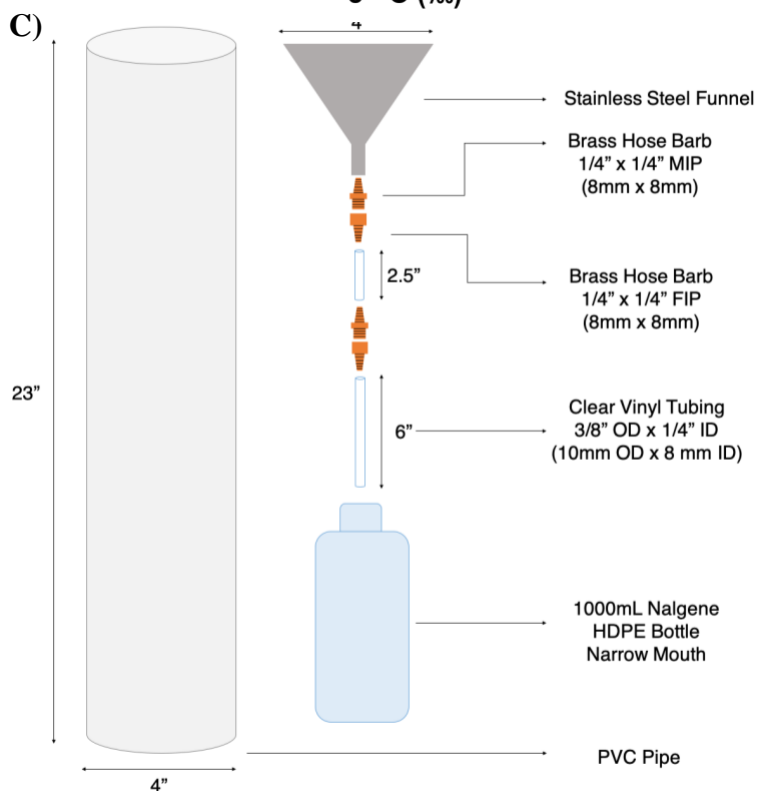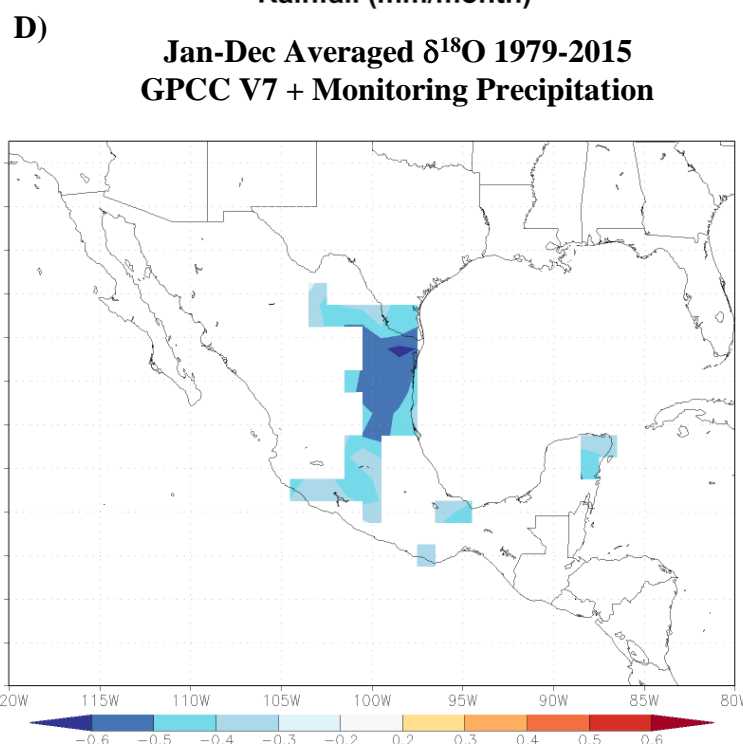

**Fig. S2. Isotopic composition of precipitation** **A)** Precipitation  $\delta^{18}\text{O}$  and  $\delta^2\text{H}$  for 48 precipitation samples collected above the cave near the city of Alta Cima. Almost all samples fall on the GMWL. **B)** Monthly averaged precipitation from a nearby weather station (Gómez-Farías, 6km from Cueva Bonita, source:www.weatherbase.com) with precipitation  $\delta^{18}\text{O}$  collected above the cave. **C)** Design of precipitation collectors built to limit wind flow and atmospheric interaction. This system relies on a series of barb and tubing to provide a more cost-effective alternative to mineral-oil precipitation collectors. All parts were assembled and glued together using hot glue and/or gorilla glue. In a 7-day trial where collectors were left in the sun in 80°F weather, no evaporation was detected. **D)** Spatial correlation of annual weighted mean precipitation  $\delta^{18}\text{O}$  from IsoGSM gridpoint nearest Cueva Bonita with annual GPCP v7 precipitation (1979-2015), illustrating a negative correlation between precipitation oxygen isotope ratios and regional precipitation amount in our study area.

A)

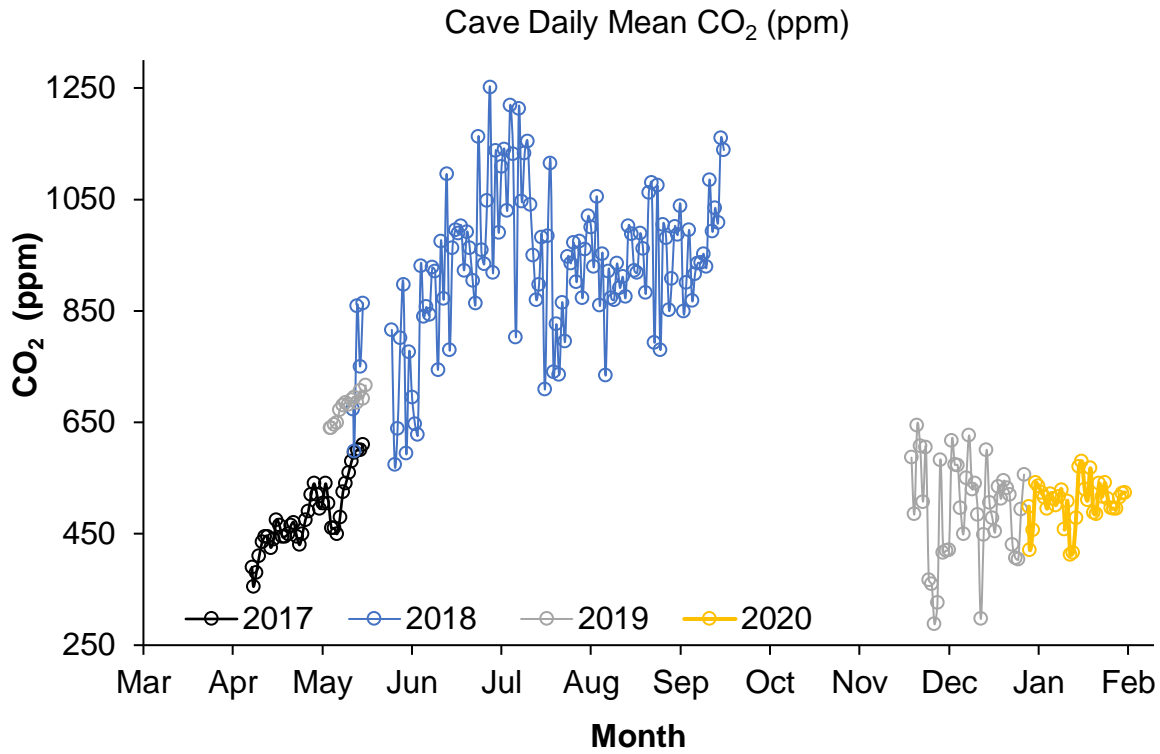

B)

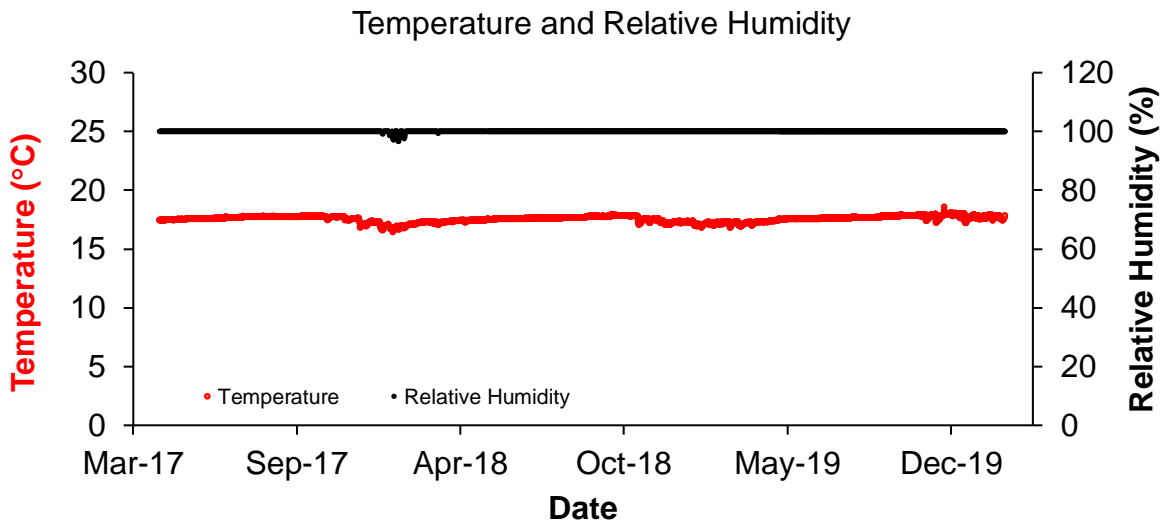

**Fig. S3. Cave temperature, relative humidity from 2017-2020.** (A) Daily mean CO<sub>2</sub> for Cueva Bonita recorded every 3-12 hours using a hand-held Vaisala GM-70 CO<sub>2</sub> monitor attached to a 12 Volt lantern battery. Higher pCO<sub>2</sub> levels are noted during summer, compared to all other seasons. Colors indicate various years of data. (B) Temperature and relative humidity in Cueva Bonita recorded from April 2017 until February 2020. Measurements were made every 2 hours using HOBO loggers. Temperature remains relatively constant at 17 and relative humidity at 100%.

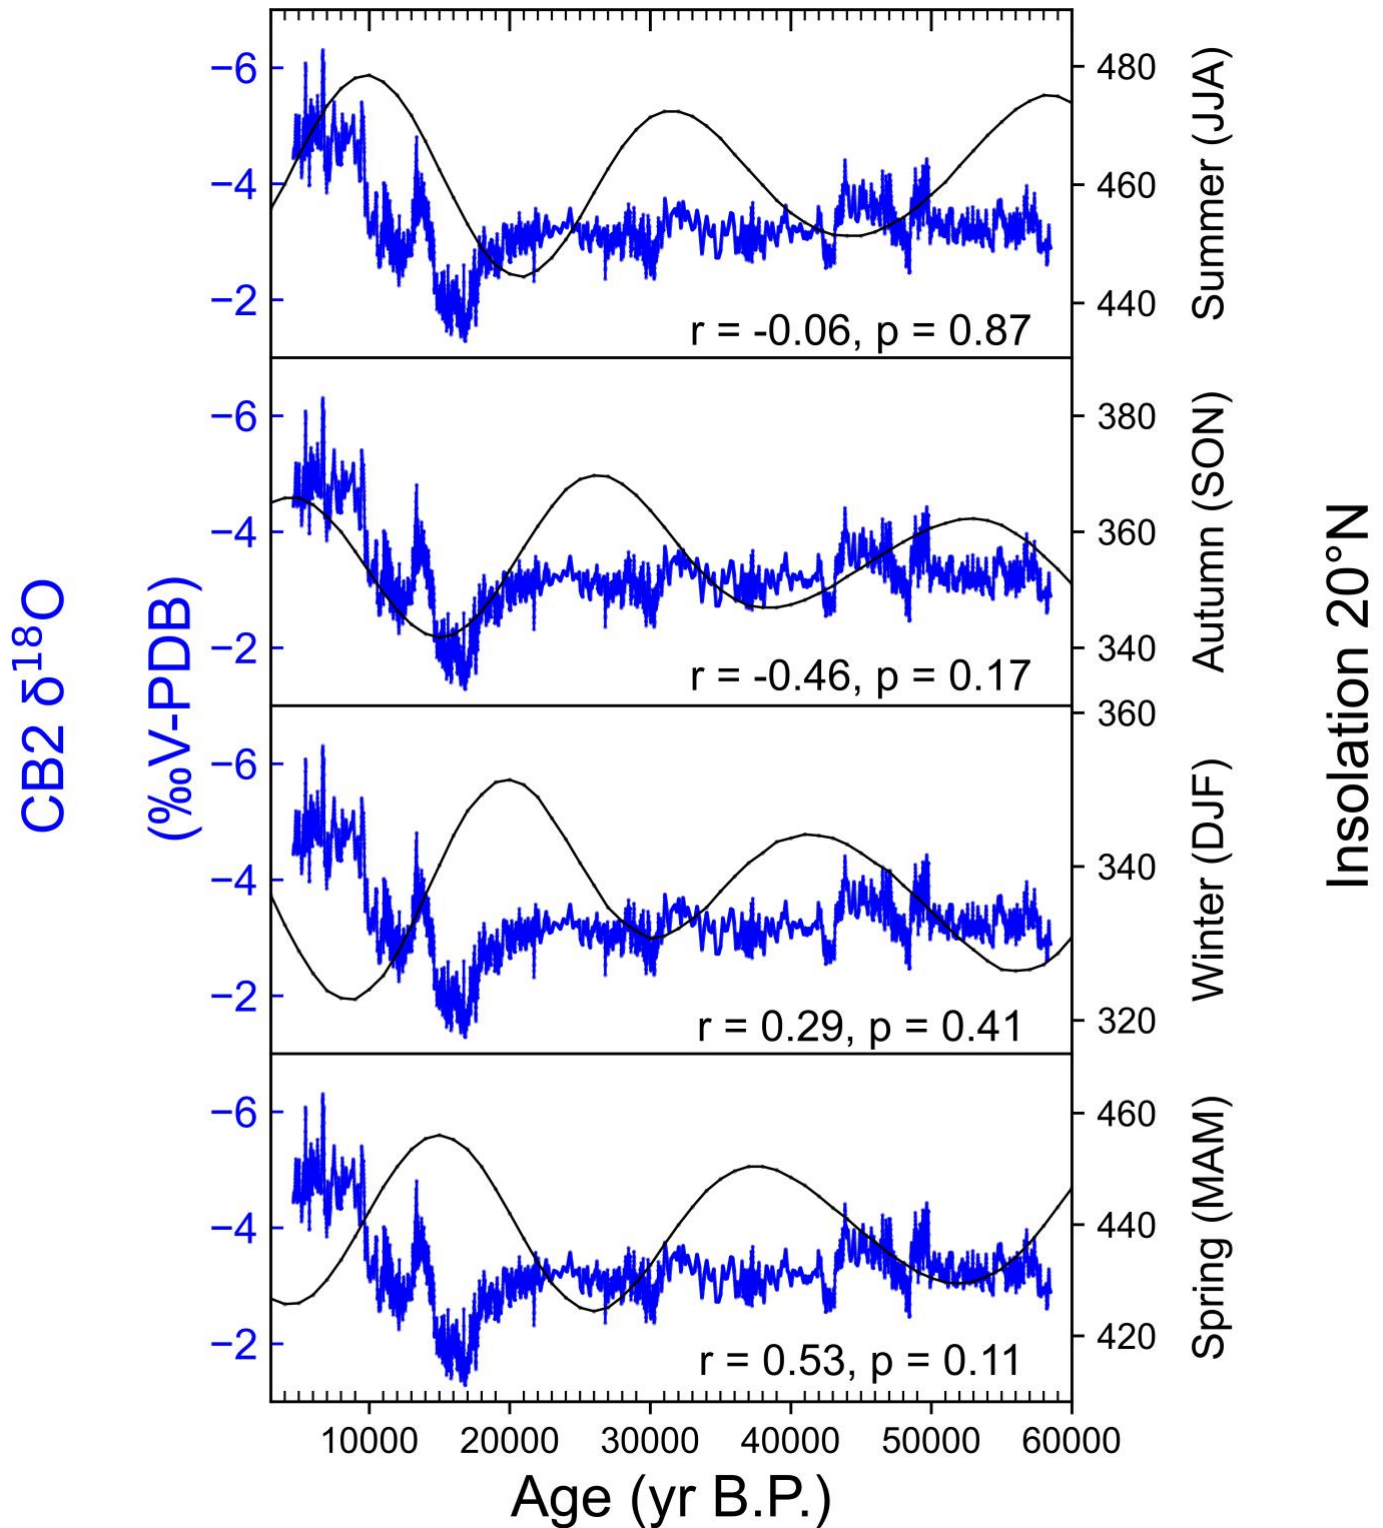

**Fig. S4. CB2  $\delta^{18}\text{O}$  (blue) compared to various seasons of insolation.** While autumn and summer insolation appear to have a strong negative correlation to CB2  $\delta^{18}\text{O}$  (positive correlation to rainfall) over the Pleistocene – Holocene transition, this co-variation does not continue over the late Pleistocene. We also do not see a significant correlation to Winter (DJF) or Spring (MAM) insolation.

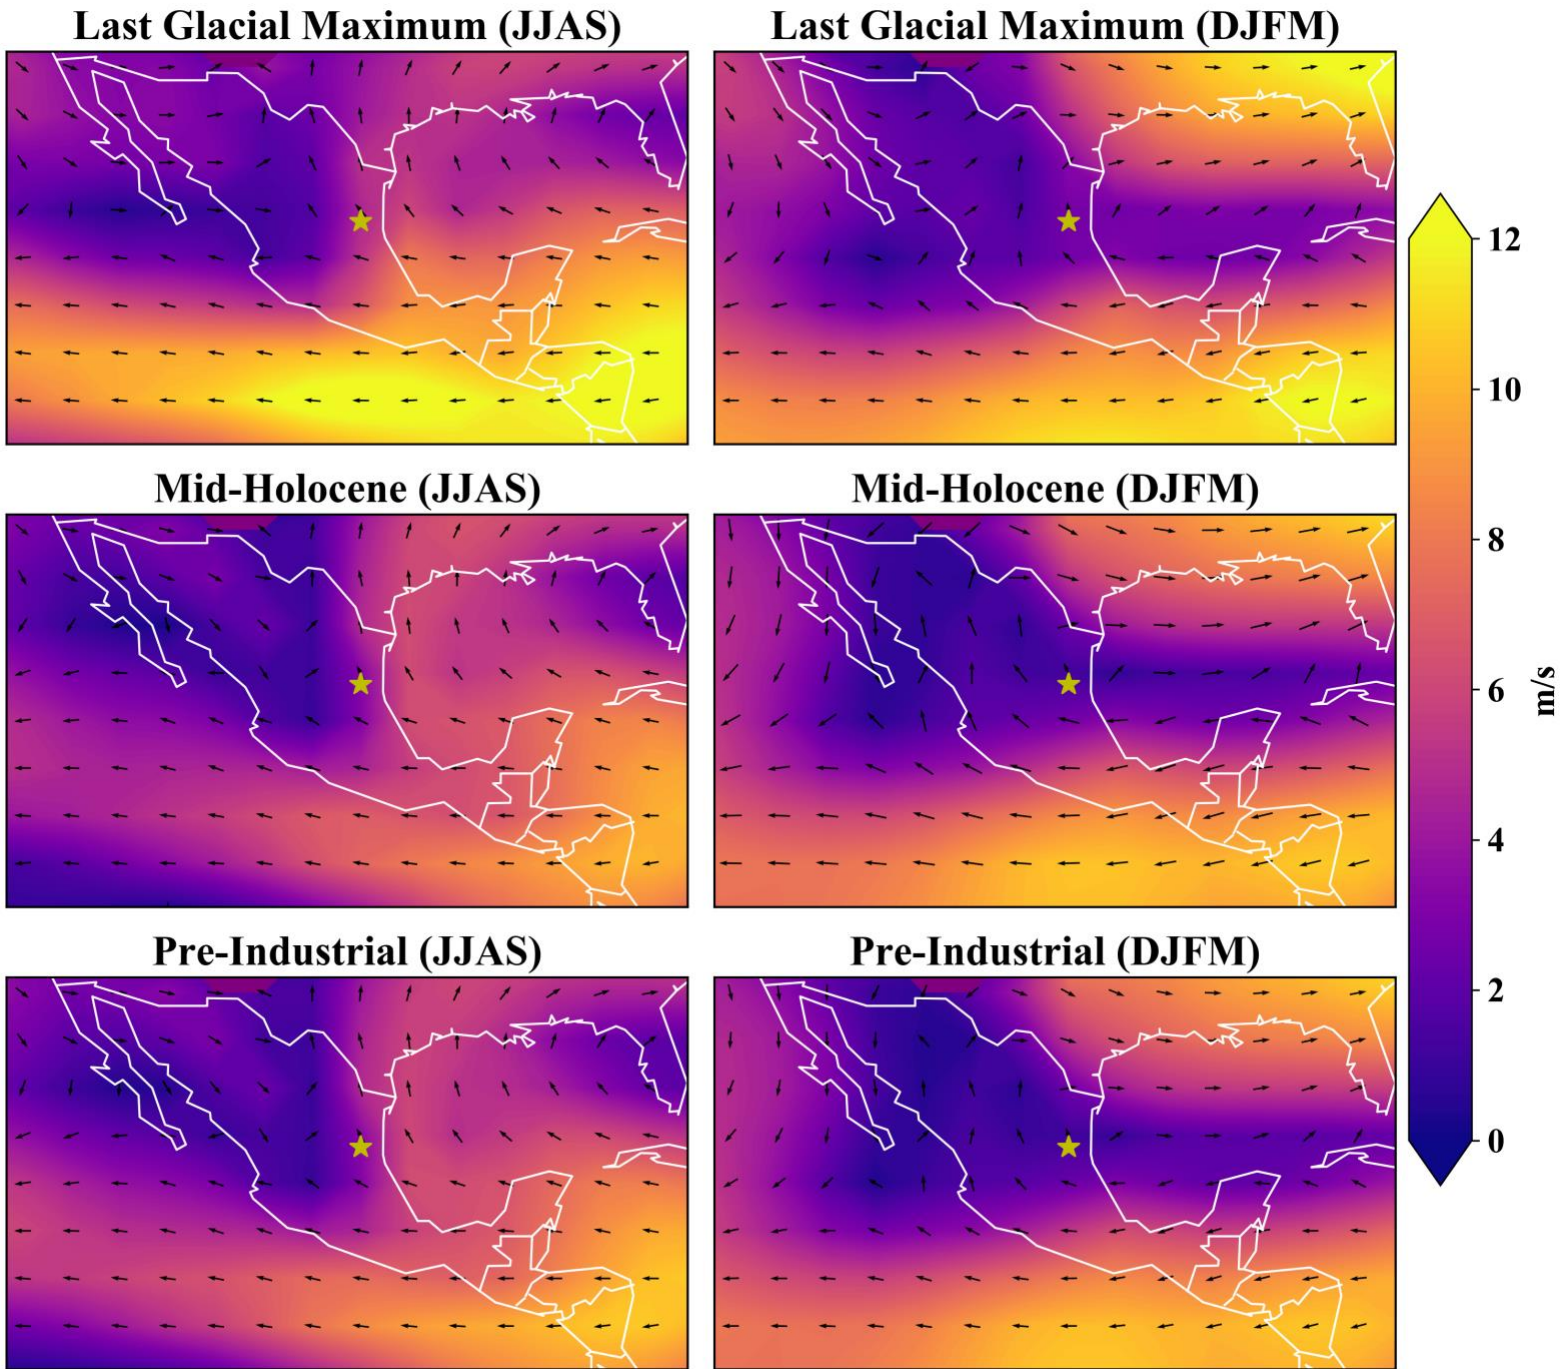

**Fig. S5. Summer and winter low level winds during the Last Glacial Maximum, Mid-Holocene and Pre-Industrial Period.** Summer (left) and winter (right) low-level wind direction and magnitude during the LGM (top), Mid-Holocene (mid) and Pre-Industrial (bottom) time periods from the NASA model GISS-E2-R (Braconnot et al., 2012). The magnitude is illustrated by color, direction is indicated by arrow. Winds were noticeably stronger during the Last Glacial Maximum (top), indicated by yellow, however, there is no major changes in in wind direction with respect to the Mid-Holocene or Pre-Industrial period that would suggest an increased proportion of rainfall from the Pacific.

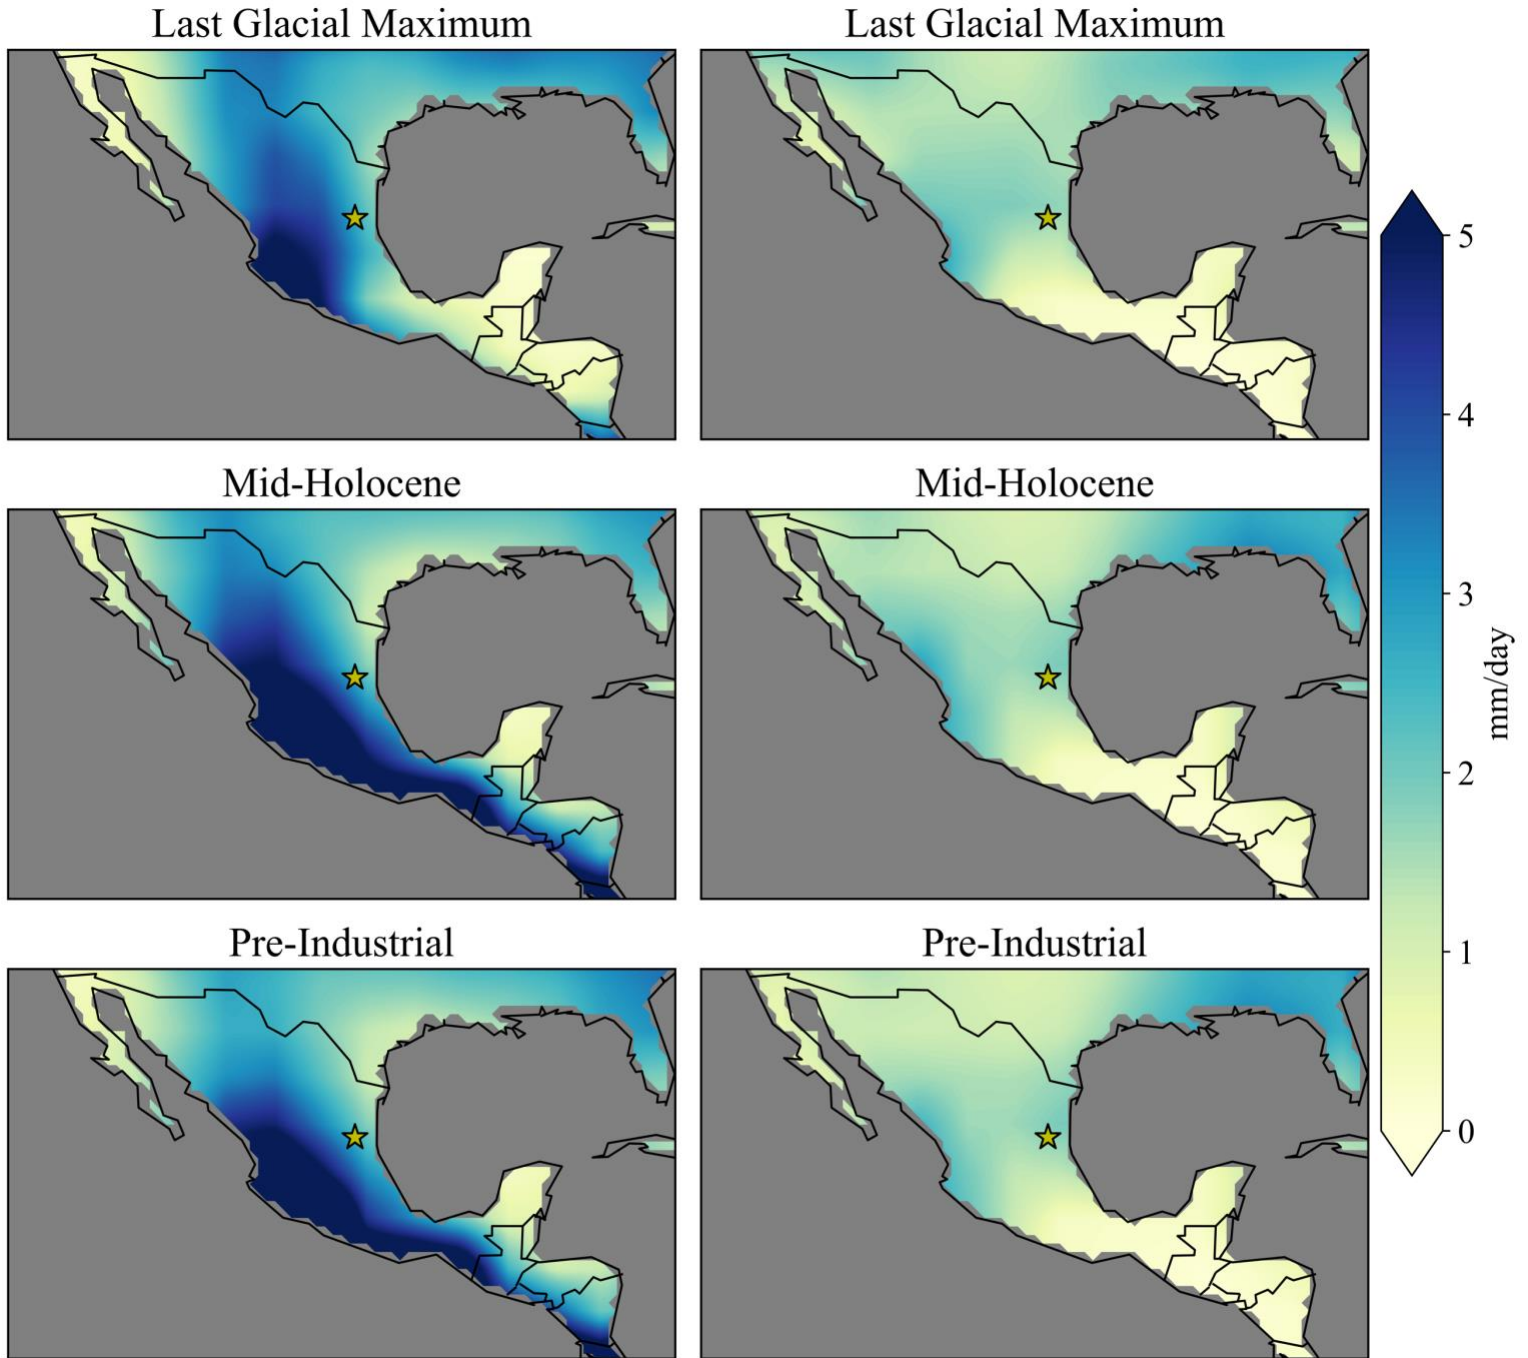

**Fig. S6. Summer and winter precipitation during the Last Glacial Maximum, Mid-Holocene and Pre-Industrial Period.** Precipitation results from PMIP3 Model GISS-E2-R (Braconnot et al., 2012). Summer (left) and winter (right) precipitation during the LGM (top), Mid-Holocene (mid) and Pre-Industrial (bottom) time periods. The model demonstrates increased precipitation throughout time (LGM<MI<PI), however, summer remains the wet season throughout all time periods.

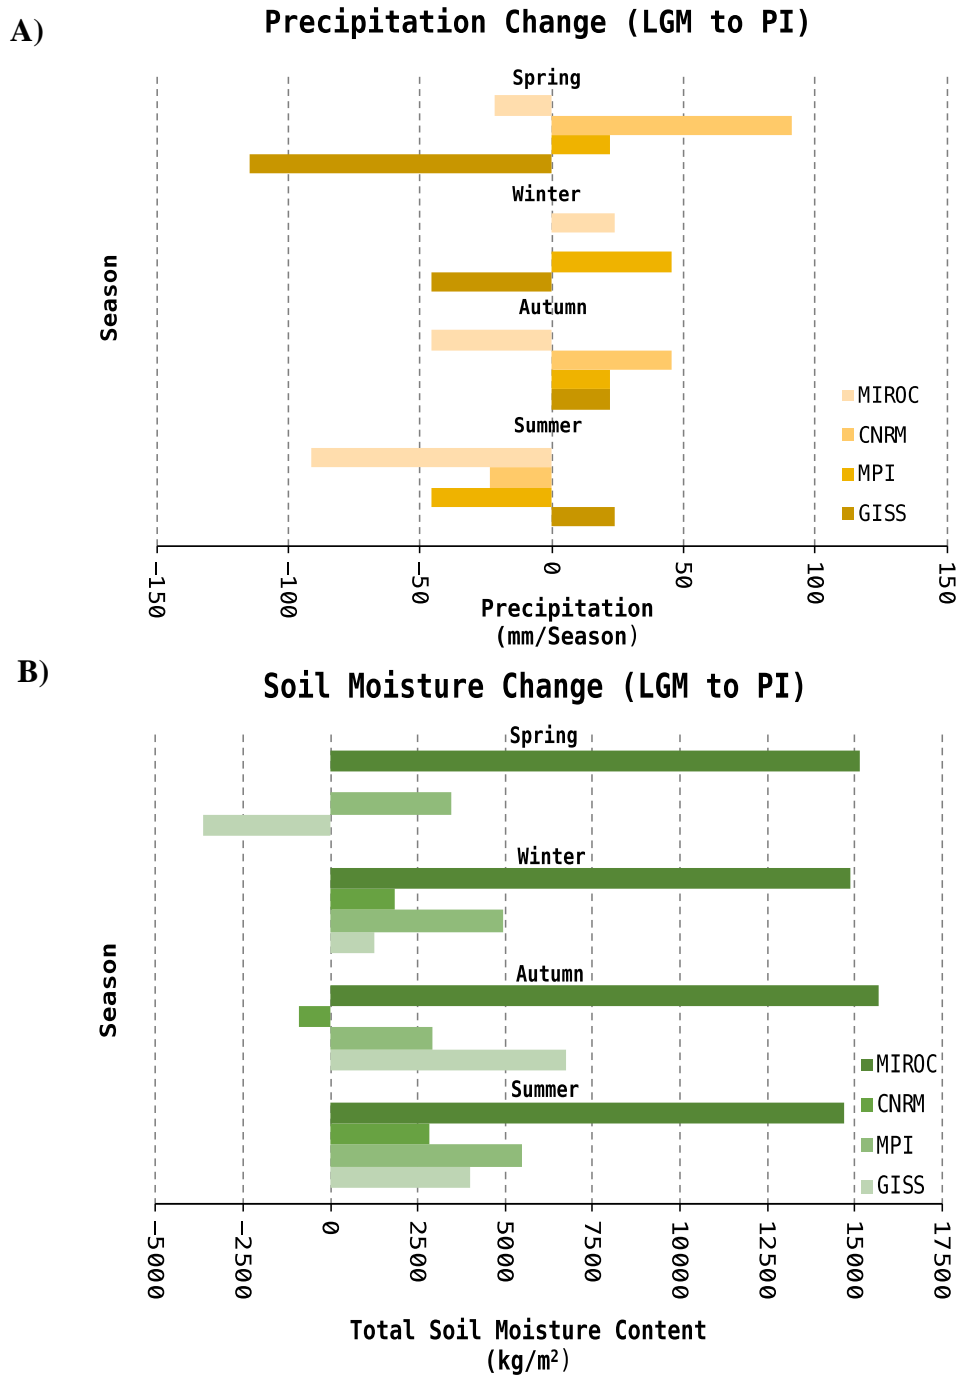

**Fig. S7. Precipitation and soil-moisture comparison between the Pre-Industrial to Last Glacial Maximum.** (A) Comparison of LGM precipitation and (B) soil moisture during the LGM and Pre-industrial for 4 of the best performing PMIP3 models during Spring (MAM), Winter (DJF), Autumn (SON) and Summer (JJA) averaged over 22°N-24°N and 98°W-100°W. It is unclear if precipitation increased or decreased during the LGM compared to PI. However, all models show increases in total soil moisture, suggestive of decreased evaporation during the LGM.

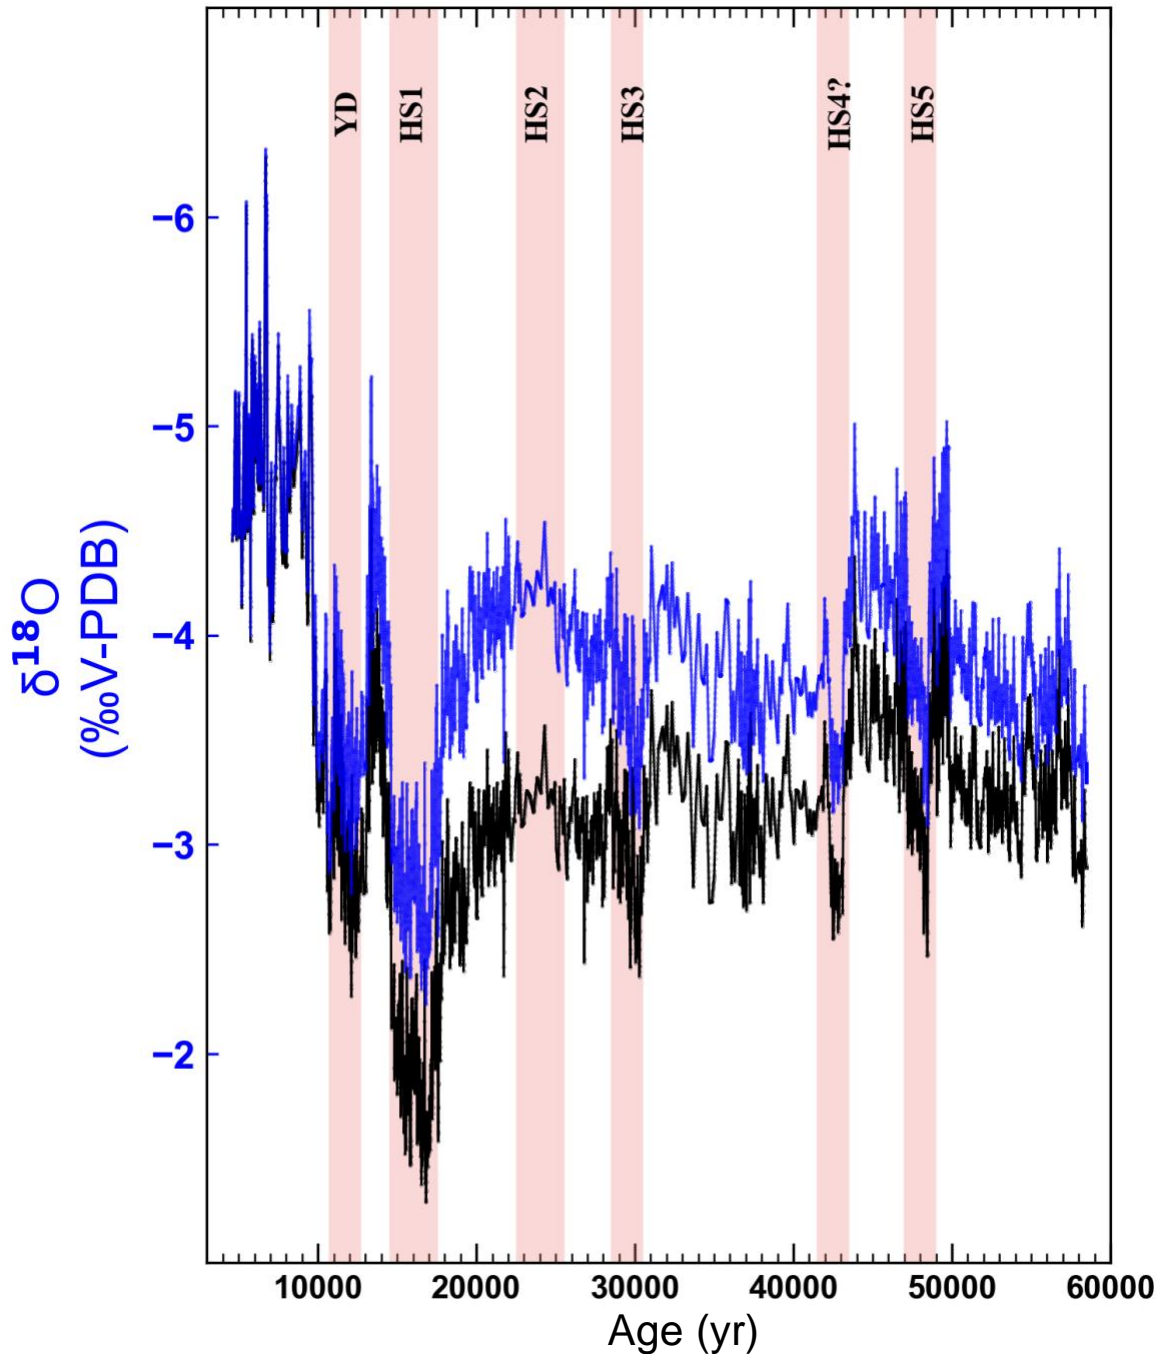

**Fig. S8. Comparison of raw CB2  $\delta^{18}\text{O}$  with mean-seawater subtracted CB2  $\delta^{18}\text{O}$ .** Mean seawater interglacial-glacial  $\delta^{18}\text{O}$  from Waelbroeck et al. (2002) subtracted from raw CB2  $\delta^{18}\text{O}_{\text{speleothem}}$  shown in black, to yield corrected CB2  $\delta^{18}\text{O}_{\text{speleothem}}$  shown in blue. Corrected  $\delta^{18}\text{O}_{\text{speleothem}}$  was used in all figures, and all other speleothem records used for comparison were also corrected using values from Waelbroeck et al. (2002). Correcting our record for changes in mean seawater  $\delta^{18}\text{O}$  does not affect the magnitude of change in millennial scale events. Furthermore, changes in  $\delta^{18}\text{O}_{\text{seawater}}$  during the Holocene were minimal, reflected in the overlap of corrected (blue) and uncorrected (black) values.

**Table S1. Uranium-thorium data for Stalagmite CB2**

| Depth<br>(mm) | <sup>238</sup> U<br>(ng/g) | <sup>232</sup> Th<br>(ng/g) | δ <sup>234</sup> U<br>(‰) | ( <sup>232</sup> Th/ <sup>238</sup> U)<br>(Activity) | <sup>230</sup> Th/ <sup>232</sup> Th<br>ppm atomic | Uncorrected Age<br>(yr) | Corrected age<br>(yr) | δ <sup>234</sup> U unit<br>(‰) |
|---------------|----------------------------|-----------------------------|---------------------------|------------------------------------------------------|----------------------------------------------------|-------------------------|-----------------------|--------------------------------|
| 3             | 39 ± 1                     | 3639 ± 95                   | 132 ± 2                   | 0.1115 ± 0.0069                                      | 19.1 ± 1.2                                         | 11298 ± 742             | 5187 ± 1399           | 134 ± 2                        |
| 14            | 38 ± 1                     | 87 ± 2                      | 128 ± 3                   | 0.0584 ± 0.0012                                      | 406.9 ± 10.2                                       | 5801 ± 133              | 5587 ± 136            | 130 ± 3                        |
| 27            | 45 ± 1                     | 159 ± 4                     | 129 ± 2                   | 0.0611 ± 0.0019                                      | 271.9 ± 9.2                                        | 6057 ± 203              | 5761 ± 207            | 131 ± 2                        |
| 45            | 52 ± 1                     | 7262 ± 146                  | 146 ± 2                   | 0.1529 ± 0.0036                                      | 17.5 ± 0.4                                         | 15565 ± 395             | 6428 ± 1848           | 149 ± 2                        |
| 85            | 63 ± 1                     | 70 ± 2                      | 174 ± 2                   | 0.1144 ± 0.0006                                      | 1648.9 ± 33.3                                      | 11154 ± 63              | 11019 ± 64            | 179 ± 2                        |
| 90            | 59 ± 1                     | 156 ± 3                     | 225 ± 3                   | 0.1219 ± 0.0006                                      | 735.6 ± 7.5                                        | 11402 ± 68              | 11180 ± 74            | 232 ± 3                        |
| 118           | 52 ± 1                     | 360 ± 7                     | 191 ± 3                   | 0.1255 ± 0.0006                                      | 290.9 ± 1.7                                        | 12111 ± 68              | 11629 ± 104           | 197 ± 3                        |
| 149           | 51 ± 1                     | 368 ± 8                     | 200 ± 2                   | 0.1361 ± 0.0009                                      | 296.8 ± 2.8                                        | 13079 ± 91              | 12576 ± 123           | 208 ± 2                        |
| 158           | 51 ± 1                     | 130 ± 3                     | 213 ± 2                   | 0.1401 ± 0.0008                                      | 874.6 ± 11.6                                       | 13331 ± 85              | 13113 ± 90            | 221 ± 2                        |
| 179           | 50 ± 1                     | 276 ± 6                     | 236 ± 2                   | 0.1482 ± 0.0007                                      | 423.4 ± 2.9                                        | 13882 ± 70              | 13492 ± 93            | 245 ± 2                        |
| 203           | 41 ± 1                     | 88 ± 2                      | 240 ± 2                   | 0.1529 ± 0.0007                                      | 1124.2 ± 16.9                                      | 14300 ± 74              | 14106 ± 78            | 250 ± 2                        |
| 235           | 47 ± 1                     | 166 ± 4                     | 230 ± 2                   | 0.1623 ± 0.0008                                      | 730.4 ± 7.2                                        | 15373 ± 87              | 15100 ± 95            | 240 ± 2                        |
| 314           | 22 ± 1                     | 109 ± 3                     | 415 ± 2                   | 0.2211 ± 0.0011                                      | 699.6 ± 11.3                                       | 18370 ± 103             | 18051 ± 114           | 437 ± 2                        |
| 344           | 22 ± 1                     | 609 ± 12                    | 447 ± 2                   | 0.2649 ± 0.0017                                      | 154.2 ± 1                                          | 21825 ± 153             | 20414 ± 299           | 474 ± 2                        |
| 376           | 30 ± 1                     | 130 ± 3                     | 355 ± 3                   | 0.2601 ± 0.0013                                      | 945.3 ± 10.1                                       | 23029 ± 138             | 22733 ± 144           | 378 ± 3                        |
| 382           | 22 ± 1                     | 140 ± 3                     | 386 ± 2                   | 0.2903 ± 0.0017                                      | 727.3 ± 8.6                                        | 25342 ± 175             | 24950 ± 185           | 415 ± 2                        |
| 413           | 18 ± 1                     | 171 ± 4                     | 378 ± 6                   | 0.3171 ± 0.0021                                      | 528.3 ± 4.8                                        | 28166 ± 249             | 27610 ± 265           | 409 ± 6                        |
| 447           | 27 ± 1                     | 952 ± 19                    | 398 ± 2                   | 0.3521 ± 0.002                                       | 157.6 ± 1                                          | 31187 ± 212             | 29320 ± 405           | 433 ± 2                        |
| 483           | 39 ± 1                     | 327 ± 7                     | 330 ± 2                   | 0.3341 ± 0.0016                                      | 628 ± 3.9                                          | 31160 ± 178             | 30642 ± 198           | 360 ± 2                        |
| 507           | 29 ± 1                     | 3827 ± 77                   | 313 ± 4                   | 0.4449 ± 0.0065                                      | 53.4 ± 0.8                                         | 44348 ± 806             | 36973 ± 1654          | 348 ± 5                        |
| 533           | 36 ± 1                     | 2619 ± 53                   | 318 ± 2                   | 0.4241 ± 0.0026                                      | 92.6 ± 0.6                                         | 41621 ± 309             | 37618 ± 824           | 354 ± 2                        |
| 556           | 34 ± 1                     | 7114 ± 144                  | 313 ± 2                   | 0.5263 ± 0.0074                                      | 39.5 ± 0.6                                         | 54588 ± 977             | 42665 ± 2592          | 354 ± 3                        |
| 577           | 24 ± 1                     | 2209 ± 44                   | 298 ± 2                   | 0.4789 ± 0.0034                                      | 81.6 ± 0.6                                         | 49253 ± 446             | 44048 ± 1098          | 338 ± 3                        |
| 582           | 26 ± 1                     | 3505 ± 70                   | 297 ± 3                   | 0.5013 ± 0.0039                                      | 60.1 ± 0.5                                         | 52171 ± 533             | 44738 ± 1549          | 338 ± 3                        |
| 603           | 34 ± 1                     | 1364 ± 28                   | 270 ± 5                   | 0.4674 ± 0.0044                                      | 183.3 ± 1.7                                        | 49166 ± 620             | 46843 ± 755           | 308 ± 5                        |
| 624           | 28 ± 1                     | 2793 ± 56                   | 263 ± 2                   | 0.4901 ± 0.0029                                      | 79.4 ± 0.5                                         | 52548 ± 406             | 46916 ± 1163          | 300 ± 2                        |
| 662           | 30 ± 1                     | 2723 ± 55                   | 254 ± 2                   | 0.5019 ± 0.0031                                      | 87.6 ± 0.6                                         | 54687 ± 448             | 49427 ± 1109          | 292 ± 2                        |
| 666           | 36 ± 1                     | 2122 ± 43                   | 238 ± 2                   | 0.4819 ± 0.0025                                      | 129 ± 0.7                                          | 52811 ± 365             | 49339 ± 753           | 274 ± 2                        |
| 690           | 40 ± 1                     | 1006 ± 20                   | 286 ± 2                   | 0.5011 ± 0.0019                                      | 316.1 ± 1.3                                        | 52770 ± 280             | 51328 ± 384           | 330 ± 2                        |
| 709           | 49 ± 1                     | 1377 ± 28                   | 274 ± 2                   | 0.5106 ± 0.0033                                      | 289.2 ± 1.9                                        | 54704 ± 459             | 53094 ± 546           | 318 ± 3                        |
| 730           | 44 ± 1                     | 921 ± 19                    | 240 ± 5                   | 0.5071 ± 0.0037                                      | 388.5 ± 3                                          | 56215 ± 603             | 54974 ± 641           | 281 ± 6                        |
| 754           | 34 ± 1                     | 8140 ± 163                  | 270 ± 1                   | 0.6207 ± 0.0046                                      | 40.8 ± 0.3                                         | 71084 ± 733             | 56987 ± 2962          | 318 ± 3                        |
| 774           | 31 ± 1                     | 4339 ± 88                   | 361 ± 3                   | 0.6268 ± 0.0053                                      | 70.5 ± 0.6                                         | 65165 ± 750             | 57731 ± 1638          | 426 ± 4                        |

All reported errors are 2σ. Errors for <sup>238</sup>U and <sup>232</sup>Th concentrations are estimated to be ±1% due to uncertainties in spike concentration; analytical uncertainties are smaller.

Corrected ages are corrected for initial <sup>230</sup>Th assuming an initial <sup>230</sup>Th/<sup>232</sup>Th of 10.5 ± 8 ppm. Decay constants for <sup>230</sup>Th and <sup>234</sup>U are from Cheng et al. (2013) decay constant for <sup>238</sup>U is 1.55125 x 10<sup>-10</sup> yr<sup>-1</sup> (Jaffey et al., 1971).

**Table S2: Precipitation from Alta Cima, Mexico and cave water  $\delta^{18}\text{O}$  and  $\delta\text{D}$  data.**

| ID    | Oxygen (VSMOW) | Hydrogen (VSMOW) | Date (m/d/yr) | Location     | Type          | Site       |
|-------|----------------|------------------|---------------|--------------|---------------|------------|
| KW1   | -1.31          | 2.74             | 5/14/18       | Alta Cima    | Precipitation | N/A        |
| KW2   | -2.29          | -8.00            | 6/7/18        | Alta Cima    | Precipitation | N/A        |
| KW3   | -10.51         | -72.17           | 6/21/18       | Alta Cima    | Precipitation | N/A        |
| KW4   | -14.03         | -98.30           | 6/22/18       | Alta Cima    | Precipitation | N/A        |
| KW5   | -5.55          | -33.62           | 6/24/18       | Alta Cima    | Precipitation | N/A        |
| KW6   | -10.28         | -71.49           | 6/27/18       | Alta Cima    | Precipitation | N/A        |
| KW7   | -3.61          | -16.12           | 6/28/18       | Alta Cima    | Precipitation | N/A        |
| KW8   | -1.25          | -0.69            | 7/6/18        | Alta Cima    | Precipitation | N/A        |
| KW9   | -3.40          | -12.97           | 7/7/18        | Alta Cima    | Precipitation | N/A        |
| KW10  | -4.99          | -24.24           | 7/8/18        | Alta Cima    | Precipitation | N/A        |
| KW11  | -3.29          | -10.32           | 8/5/18        | Alta Cima    | Precipitation | N/A        |
| KW12  | -3.97          | -21.32           | 8/6/18        | Alta Cima    | Precipitation | N/A        |
| KW13  | -4.16          | -25.34           | 8/12/18       | Alta Cima    | Precipitation | N/A        |
| KW14  | -0.85          | 6.72             | 8/13/18       | Alta Cima    | Precipitation | N/A        |
| KW15  | -1.46          | -1.77            | 8/16/18       | Alta Cima    | Precipitation | N/A        |
| KW16  | -1.28          | 2.43             | 8/17/18       | Alta Cima    | Precipitation | N/A        |
| KW17  | -2.19          | -3.02            | 8/25/18       | Alta Cima    | Precipitation | N/A        |
| KW18  | -2.74          | -7.99            | 8/27/18       | Alta Cima    | Precipitation | N/A        |
| KW19  | -2.02          | -1.01            | 8/28/18       | Alta Cima    | Precipitation | N/A        |
| KW20  | -2.64          | -5.71            | 8/30/18       | Alta Cima    | Precipitation | N/A        |
| KW21  | -4.58          | -22.23           | 9/7/18        | Alta Cima    | Precipitation | N/A        |
| KW22  | -4.48          | -26.60           | 9/9/18        | Alta Cima    | Precipitation | N/A        |
| KW23  | -3.00          | -9.69            | 9/10/18       | Alta Cima    | Precipitation | N/A        |
| KW24  | -4.33          | -21.54           | 9/11/18       | Alta Cima    | Precipitation | N/A        |
| KW25  | -8.66          | -53.86           | 9/13/18       | Alta Cima    | Precipitation | N/A        |
| KW26  | -6.31          | -36.05           | 9/15/18       | Alta Cima    | Precipitation | N/A        |
| KW27  | -6.19          | -35.53           | 9/16/18       | Alta Cima    | Precipitation | N/A        |
| KW28  | -2.13          | -1.42            | 9/18/18       | Alta Cima    | Precipitation | N/A        |
| KW29  | -3.82          | -15.74           | 9/21/18       | Alta Cima    | Precipitation | N/A        |
| KW30  | -3.91          | -20.89           | 9/23/18       | Alta Cima    | Precipitation | N/A        |
| KW31  | -3.14          | -9.97            | 9/27/18       | Alta Cima    | Precipitation | N/A        |
| KW32  | -3.17          | -9.92            | 9/29/18       | Alta Cima    | Precipitation | N/A        |
| KW33  | -2.06          | 0.20             | 10/2/18       | Alta Cima    | Precipitation | N/A        |
| KW34  | -2.05          | 0.30             | 10/3/18       | Alta Cima    | Precipitation | N/A        |
| KW35  | -3.71          | -12.92           | 10/7/18       | Alta Cima    | Precipitation | N/A        |
| KW36  | -3.56          | -13.07           | 10/9/18       | Alta Cima    | Precipitation | N/A        |
| KW37  | -3.68          | -12.96           | 10/11/18      | Alta Cima    | Precipitation | N/A        |
| KW38  | -3.70          | -13.01           | 10/15/18      | Alta Cima    | Precipitation | N/A        |
| KW39  | -7.72          | -48.65           | 10/16/18      | Alta Cima    | Precipitation | N/A        |
| KW40  | -7.57          | -48.34           | 10/17/18      | Alta Cima    | Precipitation | N/A        |
| KW41  | -6.48          | -37.64           | 10/26/18      | Alta Cima    | Precipitation | N/A        |
| KW42  | -4.64          | -17.46           | 11/28/18      | Alta Cima    | Precipitation | N/A        |
| KW43  | -1.75          | 0.76             | 3/20/19       | Alta Cima    | Precipitation | N/A        |
| KW44  | -2.41          | 0.74             | 3/21/19       | Alta Cima    | Precipitation | N/A        |
| KW45  | -2.44          | 0.77             | 3/22/19       | Alta Cima    | Precipitation | N/A        |
| KW46  | -1.74          | 1.06             | 4/30/19       | Alta Cima    | Precipitation | N/A        |
| KW47  | 0.22           | -2.87            | 5/1/19        | Alta Cima    | Precipitation | N/A        |
| KW48  | -1.55          | -2.54            | 5/3/19        | Alta Cima    | Precipitation | N/A        |
| KW94  | -2.85          | -16.83           | 5/10/18       | Cueva Bonita | Cave pool     | D2-Pool    |
| KW95  | -4.10          | -20.64           | 5/10/18       | Cueva Bonita | Drip water    | D1         |
| KW96  | -3.96          | -20.36           | 5/10/18       | Cueva Bonita | Drip water    | D2         |
| KW97  | -3.89          | -18.26           | 5/10/18       | Cueva Bonita | Drip water    | D3 - Multi |
| KW98  | -3.05          | -20.22           | 5/10/18       | Cueva Bonita | Drip water    | D4         |
| KW99  | -4.80          | -23.27           | 5/10/18       | Cueva Bonita | Drip water    | D5         |
| KW100 | -5.50          | -29.77           | 5/10/18       | Cueva Bonita | Drip water    | D6         |
| KW101 | -3.24          | -15.36           | 5/10/18       | Cueva Bonita | Drip water    | Back room  |
| KW118 | -5.30          | -27.77           | 5/4/19        | Cueva Bonita | Drip water    | D1         |
| KW119 | -3.51          | -12.66           | 5/5/19        | Cueva Bonita | Drip water    | D2         |
| KW120 | -4.27          | -19.30           | 5/6/19        | Cueva Bonita | Cave pool     | D2-Pool    |
| KW121 | -5.11          | -26.52           | 5/7/19        | Cueva Bonita | Drip water    | D4         |
| KW122 | -3.44          | -12.64           | 5/8/19        | Cueva Bonita | Drip water    | D5         |
| KW123 | -4.18          | -18.53           | 5/9/19        | Cueva Bonita | Drip water    | D6         |
| KW124 | -5.47          | -29.54           | 5/10/19       | Cueva Bonita | Drip water    | D7         |

**Table S3: CB2 Speleothem  $\delta^{18}\text{O}$ ,  $\delta^{13}\text{C}$  and Mg/Ca ratios**

| <b>ID</b> | <b>Depth (mm)</b> | <b>Age<br/>(years B.P.)</b> | <b><math>\delta^{13}\text{C}</math><br/>(V-PDPB)</b> | <b><math>\delta^{18}\text{O}</math><br/>(V-PDPB)</b> | <b>Mg/Ca<br/>(mmol/mol)</b> |
|-----------|-------------------|-----------------------------|------------------------------------------------------|------------------------------------------------------|-----------------------------|
| CB2-1     | 0.5               | 4607                        | -8.51                                                | -4.44                                                |                             |
| CB2-2     | 1                 | 4652                        | -8.54                                                | -4.61                                                | 48.99                       |
| CB2-3     | 1.5               | 4698                        | -8.67                                                | -4.47                                                |                             |
| CB2-4     | 2                 | 4744                        | -9.28                                                | -4.84                                                | 39.28                       |
| CB2-5     | 2.5               | 4791                        | -8.78                                                | -5.18                                                |                             |
| CB2-6     | 3                 | 4837                        | -8.5                                                 | -4.73                                                | 38.94                       |
| CB2-7     | 3.5               | 4883                        | -9.48                                                | -4.43                                                |                             |
| CB2-8     | 4                 | 4929                        | -9.91                                                | -4.81                                                | 34.56                       |
| CB2-9     | 4.5               | 4975                        | -10.04                                               | -4.93                                                |                             |
| CB2-10    | 5                 | 5020                        | -10.04                                               | -5.17                                                | 38.15                       |
| CB2-11    | 5.5               | 5064                        | -9.24                                                | -4.45                                                |                             |
| CB2-12    | 6                 | 5108                        | -9.47                                                | -4.58                                                | 40.1                        |
| CB2-13    | 6.5               | 5151                        | -9.78                                                | -4.55                                                |                             |
| CB2-14    | 7                 | 5192                        | -9.16                                                | -4.1                                                 | 43.1                        |
| CB2-15    | 7.5               | 5233                        |                                                      |                                                      |                             |
| CB2-16    | 8                 | 5272                        | -9.53                                                | -4.67                                                | 37.2                        |
| CB2-17    | 8.5               | 5309                        | -9.61                                                | -4.88                                                |                             |
| CB2-18    | 9                 | 5345                        | -9.64                                                | -5.12                                                | 37.35                       |
| CB2-19    | 9.5               | 5380                        | -8.93                                                | -4.89                                                |                             |
| CB2-20    | 10                | 5412                        | -9.22                                                | -4.41                                                | 41.55                       |
| CB2-21    | 10.5              | 5442                        | -10.01                                               | -5.24                                                |                             |
| CB2-22    | 11                | 5470                        | -10.31                                               | -6.08                                                | 30.72                       |
| CB2-23    | 11.5              | 5496                        | -9.79                                                | -5.95                                                |                             |
| CB2-24    | 12                | 5519                        | -9.32                                                | -4.65                                                | 40.41                       |
| CB2-25    | 12.5              | 5540                        | -9.3                                                 | -4.59                                                |                             |
| CB2-26    | 13                | 5558                        | -10.32                                               | -4.96                                                | 32.24                       |
| CB2-27    | 13.5              | 5573                        | -10.2                                                | -4.48                                                |                             |
| CB2-28    | 14                | 5585                        | -10.32                                               | -4.53                                                | 30.92                       |
| CB2-29    | 14.5              | 5595                        | -10.03                                               | -4.71                                                |                             |
| CB2-30    | 15                | 5605                        | -9.88                                                | -4.96                                                | 38.84                       |

|        |      |      |        |       |       |
|--------|------|------|--------|-------|-------|
| CB2-31 | 15.5 | 5614 | -10.15 | -4.93 |       |
| CB2-32 | 16   | 5622 | -10.04 | -5.03 | 35.39 |
| CB2-33 | 16.5 | 5630 | -10.03 | -4.89 |       |
| CB2-34 | 17   | 5637 | -9.41  | -5.18 | 39.59 |
| CB2-35 | 17.5 | 5645 | -9.13  | -4.54 |       |
| CB2-36 | 18   | 5651 | -10.19 | -4.82 | 34.65 |
| CB2-37 | 18.5 | 5658 | -10.7  | -4.95 |       |
| CB2-38 | 19   | 5664 | -10.61 | -4.8  | 32.88 |
| CB2-39 | 19.5 | 5670 | -9.71  | -4.52 |       |
| CB2-40 | 20   | 5676 | -9.56  | -4.64 | 40.08 |
| CB2-41 | 20.5 | 5681 | -9.13  | -4.9  |       |
| CB2-42 | 21   | 5687 | -9.16  | -5.04 | 40.55 |
| CB2-43 | 21.5 | 5693 |        |       |       |
| CB2-44 | 22   | 5699 | -9.68  | -4.9  | 38.91 |
| CB2-45 | 22.5 | 5705 | -9.95  | -4.83 |       |
| CB2-46 | 23   | 5711 | -10.21 | -4.76 | 39.07 |
| CB2-47 | 23.5 | 5717 | -10.02 | -5.03 |       |
| CB2-48 | 24   | 5723 | -9.91  | -4.64 | 38.84 |
| CB2-49 | 24.5 | 5730 | -10.4  | -4.85 |       |
| CB2-50 | 25   | 5737 | -11.14 | -4.25 | 28.41 |
| CB2-51 | 25.5 | 5745 | -11.44 | -3.97 |       |
| CB2-52 | 26   | 5753 | -11.43 | -3.98 | 24.38 |
| CB2-53 | 26.5 | 5762 | -11.3  | -4.62 |       |
| CB2-54 | 27   | 5771 | -11.19 | -4.87 | 25.33 |
| CB2-55 | 27.5 | 5781 | -10.48 | -4.46 |       |
| CB2-56 | 28   | 5793 | -10.66 | -5.06 | 32.24 |
| CB2-57 | 28.5 | 5808 | -11.24 | -4.84 |       |
| CB2-58 | 29   | 5824 | -11.02 | -5.34 | 25.86 |
| CB2-59 | 29.5 | 5841 | -11.44 | -5.24 |       |
| CB2-60 | 30   | 5861 | -10.79 | -5.45 | 29.66 |
| CB2-61 | 30.5 | 5881 | -10.2  | -4.99 |       |
| CB2-62 | 31   | 5904 | -10.7  | -5.06 | 30.13 |
| CB2-63 | 31.5 | 5927 | -11.21 | -4.6  |       |
| CB2-64 | 32   | 5952 | -10.96 | -4.58 | 27.46 |

|        |      |      |        |       |       |
|--------|------|------|--------|-------|-------|
| CB2-65 | 32.5 | 5979 | -10.96 | -5.13 |       |
| CB2-66 | 33   | 6006 | -10.61 | -5.32 | 30.67 |
| CB2-67 | 33.5 | 6035 | -10.36 | -5.18 |       |
| CB2-68 | 34   | 6064 | -9.77  | -5.06 | 36.58 |
| CB2-69 | 34.5 | 6094 | -9.33  | -4.8  |       |
| CB2-70 | 35   | 6126 | -9.85  | -5.02 | 32.83 |
| CB2-71 | 35.5 | 6158 | -10.03 | -5.19 |       |
| CB2-72 | 36   | 6190 | -10.21 | -4.72 | 30.64 |
| CB2-73 | 36.5 | 6223 | -10.02 | -4.78 |       |
| CB2-74 | 37   | 6257 | -10.06 | -4.68 | 33.61 |
| CB2-75 | 37.5 | 6291 | -10.07 | -5.08 |       |
| CB2-76 | 38   | 6326 | -10.58 | -5.52 | 27.92 |
| CB2-77 | 38.5 | 6361 | -10.48 | -4.61 |       |
| CB2-78 | 39   | 6396 | -9.84  | -5.24 | 32.09 |
| CB2-79 | 39.5 | 6431 | -10.53 | -4.87 |       |
| CB2-80 | 40   | 6466 | -11.39 | -4.9  | 22.25 |
| CB2-81 | 40.5 | 6501 | -10.4  | -4.71 |       |
| CB2-82 | 41   | 6536 | -9.49  | -4.72 | 37.61 |
| CB2-83 | 41.5 | 6571 | -9.2   | -4.59 |       |
| CB2-84 | 42   | 6605 | -9.77  | -4.68 | 32.35 |
| CB2-85 | 42.5 | 6640 | -9.36  | -5.13 |       |
| CB2-86 | 43   | 6673 | -10.67 | -6.15 | 27.08 |
| CB2-87 | 43.5 | 6707 | -11.03 | -6.3  |       |
| CB2-88 | 44   | 6739 | -10.64 | -5.92 | 27.61 |
| CB2-89 | 44.5 | 6771 | -10.43 | -6.08 |       |
| CB2-90 | 45   | 6802 | -9.9   | -4.99 | 34.12 |
| CB2-91 | 45.5 | 6834 | -10.1  | -4.31 |       |
| CB2-92 | 46   | 6868 | -9.61  | -4.23 | 37.85 |
| CB2-93 | 46.5 | 6903 | -9.58  | -4.44 |       |
| CB2-94 | 47   | 6940 | -9.14  | -4.24 | 41.33 |
| CB2-95 | 47.5 | 6979 | -9.75  | -3.84 |       |
| CB2-96 | 48   | 7019 | -9.87  | -4.56 | 37.12 |
| CB2-97 | 48.5 | 7061 | -9.8   | -4.8  |       |
| CB2-98 | 49   | 7105 | -9.31  | -4.26 | 36.23 |

|         |      |      |        |       |       |
|---------|------|------|--------|-------|-------|
| CB2-99  | 49.5 | 7150 | -8.98  | -4.05 |       |
| CB2-100 | 50   | 7196 | -9.55  | -4.24 | 32.1  |
| CB2-101 | 50.5 | 7244 | -10.17 | -4.37 |       |
| CB2-102 | 51   | 7293 | -10.52 | -4.76 | 27.82 |
| CB2-103 | 51.5 | 7343 | -10.39 | -4.74 |       |
| CB2-104 | 52   | 7395 | -9.83  | -4.99 | 34.19 |
| CB2-105 | 52.5 | 7448 | -10.16 | -5.05 |       |
| CB2-106 | 53   | 7502 | -10.18 | -5.41 | 27.31 |
| CB2-107 | 53.5 | 7557 | -10.69 | -4.99 |       |
| CB2-108 | 54   | 7613 | -10.56 | -4.91 | 25.97 |
| CB2-109 | 54.5 | 7670 | -9.71  | -4.64 |       |
| CB2-110 | 55   | 7728 | -9.86  | -4.42 | 33.1  |
| CB2-111 | 55.5 | 7787 | -9.66  | -4.34 |       |
| CB2-112 | 56   | 7846 | -9.46  | -4.87 | 35.31 |
| CB2-113 | 56.5 | 7907 | -9.62  | -4.37 |       |
| CB2-114 | 57   | 7968 | -9.55  | -4.33 | 34.82 |
| CB2-115 | 57.5 | 8030 | -9.38  | -4.34 |       |
| CB2-116 | 58   | 8093 | -9.93  | -5.2  | 34.48 |
| CB2-117 | 58.5 | 8156 | -10.02 | -4.73 |       |
| CB2-118 | 59   | 8219 | -9.43  | -4.58 | 36.77 |
| CB2-119 | 59.5 | 8283 | -9.94  | -4.74 |       |
| CB2-120 | 60   | 8348 | -10.77 | -5.04 | 32.57 |
| CB2-121 | 60.5 | 8413 | -10.61 | -4.8  |       |
| CB2-122 | 61   | 8478 | -10.56 | -4.71 | 28.37 |
| CB2-123 | 61.5 | 8544 | -10.37 | -4.8  |       |
| CB2-124 | 62   | 8609 |        |       | 28.66 |
| CB2-125 | 62.5 | 8675 | -10.49 | -4.88 |       |
| CB2-126 | 63   | 8742 | -11.23 | -4.99 | 23.75 |
| CB2-127 | 63.5 | 8808 | -11.46 | -4.93 |       |
| CB2-128 | 64   | 8874 | -11.41 | -5.18 | 21.55 |
| CB2-129 | 64.5 | 8940 | -10.44 | -4.74 |       |
| CB2-130 | 65   | 9006 | -9.79  | -4.35 | 34.34 |
| CB2-131 | 65.5 | 9072 | -10.99 | -4.62 |       |
| CB2-132 | 66   | 9138 | -10.62 | -4.64 | 24.21 |
| CB2-133 | 66.5 | 9204 | -10.8  | -4.74 |       |

|         |      |       |        |       |       |
|---------|------|-------|--------|-------|-------|
| CB2-134 | 67   | 9269  | -10.06 | -4.4  | 33.59 |
| CB2-135 | 67.5 | 9334  | -10.1  | -4.05 |       |
| CB2-136 | 68   | 9399  | -9.56  | -4.11 | 35.42 |
| CB2-137 | 68.5 | 9463  | -9.59  | -5.41 |       |
| CB2-138 | 69   | 9527  | -9.92  | -5.13 | 31.03 |
| CB2-139 | 69.5 | 9590  | -10.3  | -5.15 |       |
| CB2-140 | 70   | 9652  | -10.3  | -4.55 | 29.47 |
| CB2-141 | 70.5 | 9714  | -8.77  | -3.45 |       |
| CB2-142 | 71   | 9776  | -9.37  | -3.82 | 36.52 |
| CB2-143 | 71.5 | 9837  | -9.45  | -4.01 |       |
| CB2-144 | 72   | 9896  | -9.2   | -3.5  | 38.06 |
| CB2-145 | 72.5 | 9955  | -9.94  | -3.14 |       |
| CB2-146 | 73   | 10014 | -9.88  | -3.33 | 32.23 |
| CB2-147 | 73.5 | 10071 | -9.67  | -3.07 |       |
| CB2-148 | 74   | 10127 | -9.78  | -3.32 | 30.42 |
| CB2-149 | 74.5 | 10183 | -9.58  | -3.2  |       |
| CB2-150 | 75   | 10237 | -9.44  | -3.41 | 35.05 |
| CB2-151 | 75.5 | 10290 | -9.65  | -3.5  |       |
| CB2-152 | 76   | 10342 | -9.77  | -3.13 | 33.47 |
| CB2-153 | 76.5 | 10392 | -10.16 | -3.47 |       |
| CB2-154 | 77   | 10442 | -10.03 | -3.53 | 28.25 |
| CB2-155 | 77.5 | 10490 | -10.14 | -3.84 |       |
| CB2-156 | 78   | 10537 | -10.09 | -3.77 | 32.63 |
| CB2-157 | 78.5 | 10582 | -8.22  | -2.77 |       |
| CB2-158 | 79   | 10626 | -7.83  | -2.88 | 52.82 |
| CB2-159 | 79.5 | 10668 | -7.85  | -2.92 |       |
| CB2-160 | 80   | 10709 | -7.91  | -2.56 | 47.65 |
| CB2-161 | 80.5 | 10748 | -7.88  | -2.73 |       |
| CB2-162 | 81   | 10786 | -7.87  | -2.58 | 46.79 |
| CB2-163 | 81.5 | 10821 | -7.85  | -2.88 |       |
| CB2-164 | 82   | 10855 | -8.59  | -3.14 | 39.52 |
| CB2-165 | 82.5 | 10887 | -8.92  | -3.17 |       |
| CB2-166 | 83   | 10918 | -9.61  | -3.31 | 33.43 |
| CB2-167 | 83.5 | 10946 | -9.36  | -3.16 |       |
| CB2-168 | 84   | 10972 | -9.4   | -2.99 | 35    |

|         |       |       |        |       |       |
|---------|-------|-------|--------|-------|-------|
| CB2-169 | 84.5  | 10997 | -9.93  | -3.32 |       |
| CB2-170 | 85    | 11019 | -9.66  | -2.74 | 35.92 |
| CB2-171 | 85.5  | 11040 | -10.25 | -4.01 |       |
| CB2-172 | 86    | 11059 | -10.36 | -3.97 | 28.03 |
| CB2-173 | 86.5  | 11078 | -10.21 | -3.8  |       |
| CB2-174 | 87    | 11095 | -10.4  | -3.7  | 28.18 |
| CB2-175 | 87.5  | 11112 | -10.9  | -3.73 |       |
| CB2-176 | 88    | 11127 | -10.56 | -3.53 | 26.75 |
| CB2-177 | 88.5  | 11142 | -10.46 | -3.83 |       |
| CB2-178 | 89    | 11155 | -10.89 | -3.97 | 25.97 |
| CB2-179 | 89.5  | 11168 | -10.88 | -3.66 |       |
| CB2-180 | 90    | 11179 | -9.88  | -3    | 32.39 |
| CB2-181 | 90.5  | 11190 | -10.35 | -3.25 |       |
| CB2-182 | 91    | 11201 | -10.39 | -3.27 | 29.65 |
| CB2-183 | 91.5  | 11212 | -10.4  | -3.36 |       |
| CB2-184 | 92    | 11222 | -10.41 | -3.53 | 32.3  |
| CB2-185 | 92.5  | 11231 | -10.05 | -2.97 |       |
| CB2-186 | 93    | 11241 | -10.27 | -3.03 | 32.07 |
| CB2-187 | 93.5  | 11250 | -10.4  | -3.08 |       |
| CB2-188 | 94    | 11260 | -9.95  | -2.93 | 31.03 |
| CB2-189 | 94.5  | 11268 | -10.33 | -3.11 |       |
| CB2-190 | 95    | 11277 | -10.88 | -3.52 | 23.6  |
| CB2-191 | 95.5  | 11286 | -10.71 | -3.59 |       |
| CB2-192 | 96    | 11294 | -10.67 | -3.45 | 25.26 |
| CB2-193 | 96.5  | 11302 | -10.65 | -3.83 |       |
| CB2-194 | 97    | 11310 | -10.6  | -3.15 | 27.16 |
| CB2-195 | 97.5  | 11318 | -10.88 | -3.22 |       |
| CB2-196 | 98    | 11325 | -10.8  | -3.57 | 23.84 |
| CB2-197 | 98.5  | 11333 | -10.72 | -3.31 |       |
| CB2-198 | 99    | 11340 | -10.73 | -3.43 | 23.56 |
| CB2-199 | 99.5  | 11347 | -10.66 | -2.88 |       |
| CB2-200 | 100   | 11355 | -10.61 | -2.99 | 24.78 |
| CB2-201 | 100.5 | 11362 | -10.99 | -2.87 |       |
| CB2-202 | 101   | 11369 | -10.98 | -2.94 | 21.33 |

|         |       |       |        |       |       |
|---------|-------|-------|--------|-------|-------|
| CB2-203 | 101.5 | 11375 | -10.87 | -3.06 |       |
| CB2-204 | 102   | 11382 | -10.02 | -2.95 | 25.48 |
| CB2-205 | 102.5 | 11389 | -10.25 | -3.22 |       |
| CB2-206 | 103   | 11396 | -10.14 | -3.53 | 28.24 |
| CB2-207 | 103.5 | 11402 | -10.5  | -3.14 |       |
| CB2-208 | 104   | 11409 | -10.61 | -3.42 | 26.77 |
| CB2-209 | 104.5 | 11416 | -9.82  | -2.98 |       |
| CB2-210 | 105   | 11422 | -10.64 | -3.27 | 23.63 |
| CB2-211 | 105.5 | 11429 | -11.02 | -3.42 |       |
| CB2-212 | 106   | 11436 | -11.12 | -3.55 | 20.48 |
| CB2-213 | 106.5 | 11442 | -11.11 | -3.39 |       |
| CB2-214 | 107   | 11449 | -11.44 | -3.18 | 20.91 |
| CB2-215 | 107.5 | 11456 | -11.08 | -3.48 |       |
| CB2-216 | 108   | 11463 | -10.46 | -2.99 | 27.33 |
| CB2-217 | 108.5 | 11470 | -10.74 | -3.36 |       |
| CB2-218 | 109   | 11476 | -11.37 | -3.7  | 20.62 |
| CB2-219 | 109.5 | 11484 | -10.84 | -2.94 |       |
| CB2-220 | 110   | 11491 | -9.69  | -2.66 | 34.97 |
| CB2-221 | 110.5 | 11498 | -9.86  | -2.62 |       |
| CB2-222 | 111   | 11505 |        |       | 32.64 |
| CB2-223 | 111.5 | 11513 | -9.65  | -2.86 |       |
| CB2-224 | 112   | 11521 | -9.09  | -3.09 | 35.13 |
| CB2-225 | 112.5 | 11529 | -9.72  | -3.28 |       |
| CB2-226 | 113   | 11537 | -10.15 | -3.46 | 26.97 |
| CB2-227 | 113.5 | 11545 | -9.41  | -3.46 |       |
| CB2-228 | 114   | 11553 | -9.86  | -3.13 | 30.49 |
| CB2-229 | 114.5 | 11562 | -9.07  | -2.8  |       |
| CB2-230 | 115   | 11570 | -9.71  | -2.78 | 31.17 |
| CB2-231 | 115.5 | 11579 | -9.6   | -2.95 |       |
| CB2-232 | 116   | 11589 | -10.1  | -3.35 | 30.81 |
| CB2-233 | 116.5 | 11598 | -9.45  | -3.4  |       |
| CB2-234 | 117   | 11608 | -10.03 | -3.16 | 30.18 |
| CB2-235 | 117.5 | 11618 | -10.17 | -3.21 |       |
| CB2-236 | 118   | 11628 | -9.96  | -3.27 | 29.19 |

|         |       |       |        |       |       |
|---------|-------|-------|--------|-------|-------|
| CB2-237 | 118.5 | 11638 | -10.15 | -3.36 |       |
| CB2-238 | 119   | 11649 | -10.19 | -3.13 | 26.05 |
| CB2-239 | 119.5 | 11660 | -9.99  | -2.92 |       |
| CB2-240 | 120   | 11670 | -10.63 | -2.87 | 22.66 |
| CB2-241 | 120.5 | 11681 | -10.94 | -2.65 |       |
| CB2-242 | 121   | 11692 | -10.92 | -2.78 | 19.26 |
| CB2-243 | 121.5 | 11704 | -10.08 | -2.62 |       |
| CB2-244 | 122   | 11715 | -8.85  | -2.5  | 31.86 |
| CB2-245 | 122.5 | 11727 | -8.89  | -2.76 |       |
| CB2-246 | 123   | 11738 | -9.2   | -2.75 | 28.25 |
| CB2-247 | 123.5 | 11750 | -9.17  | -3.07 |       |
| CB2-248 | 124   | 11762 | -9.61  | -2.88 | 25.37 |
| CB2-249 | 124.5 | 11774 | -9.53  | -2.94 |       |
| CB2-250 | 125   | 11786 | -9.44  | -2.8  | 27.72 |
| CB2-251 | 125.5 | 11799 | -10    | -2.88 |       |
| CB2-252 | 126   | 11811 | -9.67  | -2.84 | 25.29 |
| CB2-253 | 126.5 | 11824 | -9.88  | -3.11 |       |
| CB2-254 | 127   | 11837 | -9.5   | -3.05 | 26.27 |
| CB2-255 | 127.5 | 11850 | -9.53  | -3    |       |
| CB2-256 | 128   | 11863 | -9.37  | -3.13 | 25.83 |
| CB2-257 | 128.5 | 11876 | -8.9   | -2.99 |       |
| CB2-258 | 129   | 11889 | -8.45  | -2.8  | 33.23 |
| CB2-259 | 129.5 | 11903 | -8.14  | -2.62 |       |
| CB2-260 | 130   | 11917 | -7.94  | -2.63 | 36.27 |
| CB2-261 | 130.5 | 11931 | -8.08  | -3.02 |       |
| CB2-262 | 131   | 11945 | -8.45  | -3.18 | 34.06 |
| CB2-263 | 131.5 | 11959 | -8.3   | -3.1  |       |
| CB2-264 | 132   | 11974 | -8.19  | -2.93 | 33.89 |
| CB2-265 | 132.5 | 11988 | -7.92  | -2.6  |       |
| CB2-266 | 133   | 12003 | -8.76  | -2.47 | 31.96 |
| CB2-267 | 133.5 | 12018 | -8.51  | -2.64 |       |
| CB2-268 | 134   | 12033 | -9.71  | -2.66 | 23.89 |
| CB2-269 | 134.5 | 12048 | -9.08  | -2.6  |       |
| CB2-270 | 135   | 12064 | -8.47  | -3.2  | 34.59 |

|         |       |       |        |       |       |
|---------|-------|-------|--------|-------|-------|
| CB2-271 | 135.5 | 12080 | -7.75  | -2.57 |       |
| CB2-272 | 136   | 12096 | -7.48  | -2.42 | 32.9  |
| CB2-273 | 136.5 | 12112 | -7.95  | -2.24 |       |
| CB2-274 | 137   | 12128 | -7.73  | -2.51 | 35.65 |
| CB2-275 | 137.5 | 12144 | -8.58  | -3.44 |       |
| CB2-276 | 138   | 12161 | -8.83  | -2.77 | 31.88 |
| CB2-277 | 138.5 | 12178 | -8.68  | -2.44 |       |
| CB2-278 | 139   | 12195 |        |       | 28.12 |
| CB2-279 | 139.5 | 12212 | -9.66  | -2.99 |       |
| CB2-280 | 140   | 12229 | -9.26  | -2.83 | 24.85 |
| CB2-281 | 140.5 | 12247 | -8.99  | -2.83 |       |
| CB2-282 | 141   | 12265 | -9.6   | -2.97 | 22.35 |
| CB2-283 | 141.5 | 12283 | -9.1   | -2.74 |       |
| CB2-284 | 142   | 12301 | -8.66  | -2.57 | 28.72 |
| CB2-285 | 142.5 | 12319 | -8.74  | -2.8  |       |
| CB2-286 | 143   | 12338 | -8.6   | -2.72 | 25.79 |
| CB2-287 | 143.5 | 12356 | -8.82  | -3.02 |       |
| CB2-288 | 144   | 12375 | -8.54  | -2.86 | 29.31 |
| CB2-288 | 144.5 | 12395 | -8.32  | -2.41 |       |
| CB2-289 | 145   | 12414 | -8.56  | -2.84 | 29.26 |
| CB2-291 | 145.5 | 12434 | -9.23  | -2.98 |       |
| CB2-292 | 146   | 12454 | -9.78  | -3.15 | 21.86 |
| CB2-293 | 146.5 | 12474 | -9.5   | -3.06 |       |
| CB2-294 | 147   | 12494 | -8.95  | -2.58 | 25.92 |
| CB2-295 | 147.5 | 12514 | -8.9   | -2.61 |       |
| CB2-296 | 148   | 12535 | -9.19  | -2.7  | 23.53 |
| CB2-297 | 148.5 | 12556 | -9.21  | -2.56 |       |
| CB2-298 | 149   | 12577 | -9.65  | -2.71 | 20.78 |
| CB2-299 | 149.5 | 12600 | -8.94  | -2.75 |       |
| CB2-300 | 150   | 12626 | -8.18  | -2.83 | 28.57 |
| CB2-301 | 150.5 | 12655 | -8.24  | -2.79 |       |
| CB2-302 | 151   | 12686 | -8.49  | -2.95 | 26    |
| CB2-303 | 151.5 | 12719 | -8.29  | -2.75 |       |
| CB2-304 | 152   | 12753 | -8.52  | -3.2  | 25.54 |
| CB2-305 | 152.5 | 12788 | -8.91  | -2.98 |       |
| CB2-306 | 153   | 12824 | -10.16 | -3.16 | 16.97 |

|         |       |       |        |       |       |
|---------|-------|-------|--------|-------|-------|
| CB2-307 | 153.5 | 12860 | -10.47 | -2.9  |       |
| CB2-308 | 154   | 12895 | -10.29 | -2.75 | 19.92 |
| CB2-309 | 154.5 | 12930 | -10.11 | -2.82 |       |
| CB2-310 | 155   | 12963 | -9.95  | -2.8  | 20.45 |
| CB2-311 | 155.5 | 12995 | -9.93  | -2.8  |       |
| CB2-312 | 156   | 13025 | -10.2  | -2.77 | 18.57 |
| CB2-313 | 156.5 | 13052 | -10.54 | -3.12 |       |
| CB2-314 | 157   | 13076 | -10.31 | -3.11 | 21.07 |
| CB2-315 | 157.5 | 13096 | -9.46  | -3.51 |       |
| CB2-316 | 158   | 13113 | -8.75  | -3.71 | 36.8  |
| CB2-317 | 158.5 | 13127 | -8.69  | -3.63 |       |
| CB2-318 | 159   | 13141 | -8.92  | -3.57 | 36.04 |
| CB2-319 | 159.5 | 13154 | -9.31  | -3.31 |       |
| CB2-320 | 160   | 13167 | -9.13  | -3.57 | 35.71 |
| CB2-321 | 160.5 | 13179 | -9.19  | -3.64 |       |
| CB2-322 | 161   | 13191 | -9.5   | -3.53 | 34.7  |
| CB2-323 | 161.5 | 13202 | -9.45  | -2.99 |       |
| CB2-324 | 162   | 13213 | -9.57  | -3.28 | 31.43 |
| CB2-325 | 162.5 | 13223 | -9.28  | -3    |       |
| CB2-326 | 163   | 13233 | -9.52  | -3.3  | 30.58 |
| CB2-327 | 163.5 | 13243 | -9.92  | -3.25 |       |
| CB2-328 | 164   | 13252 | -10.44 | -3.72 | 25.84 |
| CB2-329 | 164.5 | 13261 | -10.12 | -4.1  |       |
| CB2-330 | 165   | 13270 | -9.6   | -3.53 | 36.31 |
| CB2-331 | 165.5 | 13278 | -9.13  | -3.42 |       |
| CB2-332 | 166   | 13287 | -9.97  | -3.72 | 33.26 |
| CB2-333 | 166.5 | 13295 | -9.92  | -3.72 |       |
| CB2-334 | 167   | 13302 | -9.56  | -3.66 | 32.39 |
| CB2-335 | 167.5 | 13310 | -9.35  | -3.62 |       |
| CB2-336 | 168   | 13317 | -9.86  | -4.14 | 31.51 |
| CB2-337 | 168.5 | 13324 | -9.85  | -4.23 |       |
| CB2-338 | 169   | 13332 |        |       | 33.52 |
| CB2-339 | 169.5 | 13339 | -10.06 | -4.67 |       |
| CB2-340 | 170   | 13346 | -10.07 | -3.95 | 27.64 |
| CB2-341 | 170.5 | 13353 | -9.95  | -3.67 |       |

|         |       |       |        |       |       |
|---------|-------|-------|--------|-------|-------|
| CB2-342 | 171   | 13360 | -9.69  | -3.62 | 32.62 |
| CB2-343 | 171.5 | 13367 | -10.51 | -4.26 |       |
| CB2-344 | 172   | 13374 | -10.12 | -4    | 27.26 |
| CB2-345 | 172.5 | 13381 | -9.93  | -4.8  |       |
| CB2-346 | 173   | 13388 | -9.87  | -4.13 | 30.41 |
| CB2-347 | 173.5 | 13396 | -9.83  | -4.14 |       |
| CB2-348 | 174   | 13403 | -10.04 | -3.77 | 26.85 |
| CB2-349 | 174.5 | 13411 | -10.15 | -4.09 |       |
| CB2-350 | 175   | 13419 | -9.56  | -3.3  | 31.14 |
| CB2-351 | 175.5 | 13427 | -9.77  | -3.34 |       |
| CB2-352 | 176   | 13435 | -9.88  | -3.3  | 26.74 |
| CB2-353 | 176.5 | 13443 | -9.95  | -4.05 |       |
| CB2-354 | 177   | 13452 | -10.2  | -3.81 | 28.43 |
| CB2-355 | 177.5 | 13461 | -10.52 | -4.2  |       |
| CB2-356 | 178   | 13471 | -9.47  | -3.49 | 30.12 |
| CB2-357 | 178.5 | 13481 | -9.62  | -3.55 |       |
| CB2-358 | 179   | 13491 | -10.02 | -4.09 | 44.27 |
| CB2-359 | 179.5 | 13501 | -10.02 | -3.65 |       |
| CB2-360 | 180   | 13512 |        |       | 27.09 |
| CB2-361 | 180.5 | 13523 | -9.18  | -3.43 |       |
| CB2-362 | 181   | 13534 | -9.2   | -3.35 | 32.41 |
| CB2-363 | 181.5 | 13545 | -9.45  | -3.45 |       |
| CB2-364 | 182   | 13556 | -9.22  | -3.54 | 28.04 |
| CB2-365 | 182.5 | 13567 | -9.13  | -3.55 |       |
| CB2-366 | 183   | 13579 | -9.32  | -3.87 | 29.23 |
| CB2-367 | 183.5 | 13590 | -9.44  | -3.93 |       |
| CB2-368 | 184   | 13602 | -9.21  | -3.82 | 28.5  |
| CB2-369 | 184.5 | 13614 | -8.49  | -3.93 |       |
| CB2-370 | 185   | 13626 | -8.58  | -3.84 | 33.19 |
| CB2-371 | 185.5 | 13638 | -8.41  | -3.76 |       |
| CB2-372 | 186   | 13650 | -8.33  | -3.51 | 30    |
| CB2-373 | 186.5 | 13662 | -8.67  | -3.44 |       |
| CB2-374 | 187   | 13675 | -8.75  | -3.45 | 31.53 |
| CB2-375 | 187.5 | 13687 | -8.75  | -3.66 |       |
| CB2-376 | 188   | 13700 | -8.85  | -3.48 | 28.96 |
| CB2-377 | 188.5 | 13712 | -9.09  | -3.53 |       |

|         |       |       |       |       |       |
|---------|-------|-------|-------|-------|-------|
| CB2-378 | 189   | 13725 | -9.35 | -4.16 | 31.73 |
| CB2-379 | 189.5 | 13738 | -9.41 | -4.03 |       |
| CB2-380 | 190   | 13751 | -9.25 | -3.48 | 29.39 |
| CB2-381 | 190.5 | 13764 | -9.46 | -3.64 |       |
| CB2-382 | 191   | 13777 | -9.62 | -3.49 | 28.04 |
| CB2-383 | 191.5 | 13790 | -9.92 | -3.63 |       |
| CB2-384 | 192   | 13804 | -9.11 | -3.82 | 32.63 |
| CB2-385 | 192.5 | 13817 | -9.26 | -3.65 |       |
| CB2-386 | 193   | 13830 | -9.14 | -3.65 | 27.69 |
| CB2-387 | 193.5 | 13844 | -9.47 | -3.48 |       |
| CB2-388 | 194   | 13857 | -9.3  | -3.69 | 28.02 |
| CB2-389 | 194.5 | 13871 | -9.56 | -3.98 |       |
| CB2-390 | 195   | 13884 | -9.27 | -4.01 | 28.11 |
| CB2-391 | 195.5 | 13898 | -8.86 | -3.41 |       |
| CB2-392 | 196   | 13912 | -8.86 | -3.64 | 29.09 |
| CB2-393 | 196.5 | 13925 | -8.51 | -3.53 |       |
| CB2-394 | 197   | 13939 | -8.42 | -3.4  | 29.96 |
| CB2-395 | 197.5 | 13953 | -8.49 | -3.26 |       |
| CB2-396 | 198   | 13967 | -9.29 | -3.69 | 27.86 |
| CB2-397 | 198.5 | 13981 | -9.39 | -3.75 |       |
| CB2-398 | 199   | 13994 | -9.46 | -3.74 | 28.89 |
| CB2-399 | 199.5 | 14008 | -8.95 | -3.21 |       |
| CB2-400 | 200   | 14022 | -9.08 | -3.39 | 29.93 |
| CB2-401 | 200.5 | 14036 | -9.12 | -3.46 |       |
| CB2-402 | 201   | 14050 | -9.2  | -3.56 | 21.36 |
| CB2-403 | 201.5 | 14064 | -9.29 | -3.72 |       |
| CB2-404 | 202   | 14078 | -9.02 | -3.58 | 25.53 |
| CB2-405 | 202.5 | 14092 | -9    | -3.42 |       |
| CB2-406 | 203   | 14106 | -8.39 | -3.03 | 29.2  |
| CB2-407 | 203.5 | 14120 | -8.61 | -3.05 |       |
| CB2-408 | 204   | 14134 | -8.99 | -3.34 | 27.21 |
| CB2-409 | 204.5 | 14148 |       |       |       |
| CB2-410 | 205   | 14162 | -9.23 | -3.25 | 25.49 |
| CB2-411 | 205.5 | 14176 | -9.08 | -3.25 |       |
| CB2-412 | 206   | 14190 | -8.85 | -3.21 | 33.79 |
| CB2-413 | 206.5 | 14205 | -9.4  | -3.49 |       |

|         |       |       |        |       |       |
|---------|-------|-------|--------|-------|-------|
| CB2-414 | 207   | 14219 | -10.38 | -3.68 | 21.99 |
| CB2-415 | 207.5 | 14234 | -9.63  | -3.38 |       |
| CB2-416 | 208   | 14248 | -8.88  | -3.08 | 33.98 |
| CB2-417 | 208.5 | 14263 |        |       |       |
| CB2-418 | 209   | 14277 | -9.05  | -3.34 | 30.93 |
| CB2-419 | 209.5 | 14292 | -8.31  | -2.88 |       |
| CB2-420 | 210   | 14307 | -7.69  | -2.84 | 39.42 |
| CB2-421 | 210.5 | 14321 | -7.85  | -2.74 |       |
| CB2-422 | 211   | 14336 | -8     | -2.75 | 33.92 |
| CB2-423 | 211.5 | 14351 | -7.93  | -2.72 |       |
| CB2-424 | 212   | 14366 | -7.76  | -2.75 | 33.45 |
| CB2-425 | 212.5 | 14381 | -8.02  | -2.69 |       |
| CB2-426 | 213   | 14396 | -8.16  | -3.06 | 32.98 |
| CB2-427 | 213.5 | 14411 | -8.45  | -3.3  |       |
| CB2-428 | 214   | 14426 | -8.29  | -3.04 | 33.08 |
| CB2-449 | 214.5 | 14442 | -8.27  | -3.22 |       |
| CB2-430 | 215   | 14457 | -8.78  | -3.32 | 26.87 |
| CB2-431 | 215.5 | 14472 | -8.46  | -3.02 |       |
| CB2-432 | 216   | 14488 | -8.19  | -3.06 | 33.25 |
| CB2-433 | 216.5 | 14503 | -8.48  | -3.19 |       |
| CB2-434 | 217   | 14518 | -8.07  | -3.18 | 26.54 |
| CB2-435 | 217.5 | 14534 | -8.33  | -2.86 |       |
| CB2-436 | 218   | 14549 | -8.1   | -2.92 | 32.46 |
| CB2-437 | 218.5 | 14565 | -7.63  | -2.68 |       |
| CB2-438 | 219   | 14581 | -8.03  | -2.58 | 27.31 |
| CB2-439 | 219.5 | 14596 | -8.36  | -3.04 |       |
| CB2-440 | 220   | 14612 | -7.77  | -2.7  | 29.44 |
| CB2-441 | 220.5 | 14628 | -7.57  | -2.19 |       |
| CB2-442 | 221   | 14644 | -7.92  | -2.13 | 31.07 |
| CB2-443 | 221.5 | 14659 | -7.94  | -2.12 |       |
| CB2-444 | 222   | 14675 | -7.85  | -2.21 | 32.27 |
| CB2-445 | 222.5 | 14691 | -7.77  | -2.31 |       |
| CB2-446 | 223   | 14707 | -7.81  | -2.23 | 29.52 |
| CB2-447 | 223.5 | 14723 | -8.36  | -2.15 |       |
| CB2-448 | 224   | 14739 |        |       | 36.33 |
| CB2-449 | 224.5 | 14755 | -8     | -2.16 |       |

|         |       |       |        |       |       |
|---------|-------|-------|--------|-------|-------|
| CB2-450 | 225   | 14771 | -8.53  | -2.3  | 29.43 |
| CB2-451 | 225.5 | 14788 | -8.79  | -2.37 |       |
| CB2-452 | 226   | 14804 | -9.06  | -2.45 | 28.88 |
| CB2-453 | 226.5 | 14820 | -8.48  | -1.83 |       |
| CB2-454 | 227   | 14836 | -8.14  | -2    | 26.89 |
| CB2-455 | 227.5 | 14853 | -8.17  | -1.95 |       |
| CB2-456 | 228   | 14869 |        |       | 32.67 |
| CB2-457 | 228.5 | 14885 | -7.56  | -1.89 |       |
| CB2-458 | 229   | 14902 | -7.82  | -1.97 | 28.2  |
| CB2-459 | 229.5 | 14918 | -8.31  | -2.11 |       |
| CB2-460 | 230   | 14934 | -8.01  | -2.17 | 32.84 |
| CB2-461 | 230.5 | 14951 | -8.05  | -2.17 |       |
| CB2-462 | 231   | 14967 | -8.31  | -2.13 | 24.55 |
| CB2-463 | 231.5 | 14984 | -8.87  | -1.94 |       |
| CB2-464 | 232   | 15001 | -8.16  | -1.78 | 28    |
| CB2-465 | 232.5 | 15017 | -9.17  | -1.92 |       |
| CB2-466 | 233   | 15034 | -10.31 | -2.06 | 14.86 |
| CB2-467 | 233.5 | 15050 | -10.44 | -2.24 |       |
| CB2-468 | 234   | 15067 | -9.24  | -2.22 | 24.53 |
| CB2-469 | 234.5 | 15084 | -8.66  | -1.88 |       |
| CB2-470 | 235   | 15100 | -8.36  | -1.89 | 26.75 |
| CB2-471 | 235.5 | 15117 | -8.4   | -2.13 |       |
| CB2-472 | 236   | 15134 | -8.24  | -2.28 | 30.51 |
| CB2-473 | 236.5 | 15150 | -8.06  | -1.93 |       |
| CB2-474 | 237   | 15167 | -8.35  | -2.46 | 25.82 |
| CB2-475 | 237.5 | 15183 | -8.49  | -1.99 |       |
| CB2-476 | 238   | 15200 | -8.03  | -1.79 | 31.38 |
| CB2-477 | 238.5 | 15216 | -7.81  | -1.89 |       |
| CB2-478 | 239   | 15233 | -8.71  | -1.66 | 21.26 |
| CB2-479 | 239.5 | 15249 | -8.41  | -1.81 |       |
| CB2-480 | 240   | 15265 | -8.98  | -1.96 | 21.71 |
| CB2-481 | 240.5 | 15282 | -9.26  | -1.99 |       |
| CB2-482 | 241   | 15298 | -8.72  | -2.07 | 25.22 |
| CB2-483 | 241.5 | 15314 | -8.47  | -2.24 |       |
| CB2-484 | 242   | 15330 | -9.32  | -2.48 | 21.15 |
| CB2-485 | 242.5 | 15346 | -8.86  | -2.02 |       |

|         |       |       |       |       |       |
|---------|-------|-------|-------|-------|-------|
| CB2-486 | 243   | 15362 | -9.21 | -2.19 | 25.59 |
| CB2-487 | 243.5 | 15378 | -9.32 | -2.01 |       |
| CB2-488 | 244   | 15394 | -9.34 | -1.88 | 21.63 |
| CB2-489 | 244.5 | 15410 | -9.02 | -1.75 |       |
| CB2-490 | 245   | 15426 | -6.6  | -1.62 | 30.33 |
| CB2-491 | 245.5 | 15442 | -8.46 | -1.64 |       |
| CB2-492 | 246   | 15458 | -8.83 | -1.85 | 24.01 |
| CB2-493 | 246.5 | 15474 | -9.48 | -1.69 |       |
| CB2-494 | 247   | 15490 | -8.82 | -1.84 | 27.58 |
| CB2-495 | 247.5 | 15506 | -7.29 | -1.46 |       |
| CB2-496 | 248   | 15522 | -7.92 | -2.07 | 26.15 |
| CB2-497 | 248.5 | 15538 | -8.22 | -1.76 |       |
| CB2-498 | 249   | 15553 | -8.53 | -1.56 | 25.73 |
| CB2-499 | 249.5 | 15569 | -8.14 | -1.53 |       |
| CB2-500 | 250   | 15585 | -8.02 | -1.84 | 28.67 |
| CB2-501 | 250.5 | 15601 | -8.89 | -1.77 |       |
| CB2-502 | 251   | 15617 | -9.6  | -2.59 | 29.26 |
| CB2-503 | 251.5 | 15632 | -8.44 | -1.53 |       |
| CB2-504 | 252   | 15648 | -7.92 | -2.26 | 27.79 |
| CB2-505 | 252.5 | 15664 | -7.82 | -2.02 |       |
| CB2-506 | 253   | 15680 | -7.87 | -1.78 | 32.75 |
| CB2-507 | 253.5 | 15695 | -9.57 | -2.1  |       |
| CB2-508 | 254   | 15711 | -8.59 | -2    | 26.73 |
| CB2-509 | 254.5 | 15727 | -8.59 | -1.69 |       |
| CB2-510 | 255   | 15743 | -9.04 | -1.85 | 28.45 |
| CB2-511 | 255.5 | 15759 | -8.8  | -1.66 |       |
| CB2-512 | 256   | 15774 | -8.43 | -2.12 | 26.81 |
| CB2-513 | 256.5 | 15790 | -9.49 | -1.96 |       |
| CB2-514 | 257   | 15806 | -9.12 | -1.8  | 30.63 |
| CB2-515 | 257.5 | 15822 | -6.92 | -1.4  |       |
| CB2-516 | 258   | 15838 | -6.62 | -1.85 | 33.82 |
| CB2-517 | 258.5 | 15853 | -6.58 | -1.53 |       |
| CB2-518 | 259   | 15869 | -6.27 | -1.45 | 27.28 |
| CB2-519 | 259.5 | 15885 | -7.08 | -2.08 |       |
| CB2-520 | 260   | 15901 | -7.45 | -2.3  | 32.74 |
| CB2-521 | 260.5 | 15917 | -7.42 | -1.8  |       |

|         |       |       |       |       |       |
|---------|-------|-------|-------|-------|-------|
| CB2-522 | 261   | 15933 | -8.21 | -2.02 | 29.41 |
| CB2-523 | 261.5 | 15949 | -8.4  | -1.97 |       |
| CB2-524 | 262   | 15965 | -8.67 | -2.32 | 28.93 |
| CB2-525 | 262.5 | 15981 | -8.98 | -1.85 |       |
| CB2-526 | 263   | 15997 | -9.2  | -2    | 28.46 |
| CB2-527 | 263.5 | 16013 | -8.5  | -1.98 |       |
| CB2-528 | 264   | 16029 | -8.53 | -2.27 | 28.26 |
| CB2-529 | 264.5 | 16045 | -8.72 | -1.84 |       |
| CB2-530 | 265   | 16062 | -9    | -1.83 | 28.78 |
| CB2-531 | 265.5 | 16078 | -9.3  | -1.83 |       |
| CB2-532 | 266   | 16094 | -8.8  | -2.23 | 28.55 |
| CB2-533 | 266.5 | 16110 | -7.72 | -1.76 |       |
| CB2-534 | 267   | 16127 | -7.36 | -1.94 | 26.61 |
| CB2-535 | 267.5 | 16143 | -6.9  | -1.87 |       |
| CB2-536 | 268   | 16159 | -7.63 | -2.19 | 28.99 |
| CB2-537 | 268.5 | 16176 | -7.83 | -2.26 |       |
| CB2-538 | 269   | 16192 | -7.8  | -2.3  | 22.87 |
| CB2-539 | 269.5 | 16209 | -8.63 | -2.25 |       |
| CB2-540 | 270   | 16226 | -8.28 | -2.41 | 23.97 |
| CB2-541 | 270.5 | 16242 | -8.3  | -1.83 |       |
| CB2-542 | 271   | 16259 | -8.12 | -1.57 | 25.45 |
| CB2-543 | 271.5 | 16276 | -7.95 | -1.57 |       |
| CB2-544 | 272   | 16293 | -7.73 | -1.78 | 26.17 |
| CB2-545 | 272.5 | 16309 | -7.68 | -1.54 |       |
| CB2-546 | 273   | 16326 | -7.22 | -1.79 | 23.6  |
| CB2-547 | 273.5 | 16343 | -7.59 | -1.59 |       |
| CB2-548 | 274   | 16360 | -7.63 | -2.16 | 26.62 |
| CB2-549 | 274.5 | 16377 | -7.51 | -1.83 |       |
| CB2-550 | 275   | 16395 | -7.63 | -1.59 | 25.37 |
| CB2-551 | 275.5 | 16412 | -7.59 | -1.78 |       |
| CB2-552 | 276   | 16429 | -7.9  | -2.04 | 26.02 |
| CB2-553 | 276.5 | 16447 | -7.42 | -1.57 |       |
| CB2-554 | 277   | 16464 | -6.96 | -1.66 |       |
| CB2-555 | 277.5 | 16481 | -7.24 | -1.48 |       |

|         |       |       |       |       |       |
|---------|-------|-------|-------|-------|-------|
| CB2-556 | 278   | 16499 | -7.82 | -1.92 | 28.22 |
| CB2-557 | 278.5 | 16517 | -8.32 | -1.45 |       |
| CB2-558 | 279   | 16534 | -7.03 | -1.36 | 24.83 |
| CB2-559 | 279.5 | 16552 | -7.28 | -1.64 |       |
| CB2-560 | 280   | 16570 | -7.75 | -1.92 | 27.04 |
| CB2-561 | 280.5 | 16588 | -7.69 | -1.45 |       |
| CB2-562 | 281   | 16606 | -7.57 | -1.54 | 26.71 |
| CB2-563 | 281.5 | 16624 | -7.88 | -1.67 |       |
| CB2-564 | 282   | 16642 | -8.22 | -2.01 | 26.64 |
| CB2-565 | 282.5 | 16661 | -8.25 | -1.67 |       |
| CB2-566 | 283   | 16679 | -7.95 | -1.71 | 24.77 |
| CB2-567 | 283.5 | 16698 | -8.83 | -1.51 |       |
| CB2-568 | 284   | 16716 | -8.06 | -1.71 | 27.59 |
| CB2-569 | 284.5 | 16735 | -7.6  | -2.6  |       |
| CB2-570 | 285   | 16754 | -8.23 | -1.53 | 24.84 |
| CB2-571 | 285.5 | 16772 | -7.87 | -1.35 |       |
| CB2-572 | 286   | 16791 | -8.23 | -1.55 | 28.09 |
| CB2-573 | 286.5 | 16810 | -8.33 | -1.3  |       |
| CB2-574 | 287   | 16830 | -7.96 | -1.29 | 27.2  |
| CB2-575 | 287.5 | 16849 | -7.96 | -1.41 |       |
| CB2-576 | 288   | 16868 | -7.91 | -1.75 | 30.03 |
| CB2-577 | 288.5 | 16888 | -8.55 | -1.57 |       |
| CB2-578 | 289   | 16907 | -7.88 | -1.68 | 25.15 |
| CB2-579 | 289.5 | 16927 | -7.88 | -1.42 |       |
| CB2-580 | 290   | 16947 | -7.29 | -1.68 | 33.06 |
| CB2-581 | 290.5 | 16966 | -7.75 | -1.5  |       |
| CB2-582 | 291   | 16986 | -7.17 | -1.58 | 26.14 |
| CB2-583 | 291.5 | 17006 | -6.82 | -1.51 |       |
| CB2-584 | 292   | 17027 | -7.24 | -1.84 | 27.63 |
| CB2-585 | 292.5 | 17047 | -7.47 | -1.59 |       |
| CB2-586 | 293   | 17067 | -7.11 | -1.68 | 24.28 |
| CB2-587 | 293.5 | 17088 | -6.84 | -1.51 |       |
| CB2-588 | 294   | 17109 | -7.06 | -1.96 | 33.72 |
| CB2-589 | 294.5 | 17129 | -7.5  | -1.88 |       |

|         |       |       |       |       |       |
|---------|-------|-------|-------|-------|-------|
| CB2-590 | 295   | 17150 | -7.88 | -1.99 | 31.21 |
| CB2-591 | 295.5 | 17171 | -8.21 | -1.91 |       |
| CB2-592 | 296   | 17192 | -7.88 | -2.49 | 28.7  |
| CB2-593 | 296.5 | 17214 | -7.44 | -1.67 |       |
| CB2-594 | 297   | 17235 | -7.49 | -1.76 | 22.48 |
| CB2-595 | 297.5 | 17257 | -7.95 | -1.97 |       |
| CB2-596 | 298   | 17278 | -8.07 | -2.27 | 24.95 |
| CB2-597 | 298.5 | 17300 | -8.32 | -2.02 |       |
| CB2-598 | 299   | 17322 | -8.54 | -2.09 | 25.57 |
| CB2-599 | 299.5 | 17344 | -8.55 | -2.15 |       |
| CB2-600 | 300   | 17366 | -8.36 | -2.47 | 21.17 |
| CB2-601 | 300.5 | 17389 | -8.43 | -2.02 |       |
| CB2-602 | 301   | 17411 | -7.8  | -1.91 | 23.69 |
| CB2-603 | 301.5 | 17434 | -7.52 | -2.42 |       |
| CB2-604 | 302   | 17457 | -7.66 | -2.73 | 26    |
| CB2-605 | 302.5 | 17480 | -7.81 | -2.31 |       |
| CB2-606 | 303   | 17503 | -8.54 | -2.86 | 20.52 |
| CB2-607 | 303.5 | 17526 | -8.03 | -1.9  |       |
| CB2-608 | 304   | 17549 | -8.23 | -2.11 | 29.28 |
| CB2-609 | 304.5 | 17573 | -7.54 | -1.7  |       |
| CB2-610 | 305   | 17596 | -7.14 | -1.56 | 20.25 |
| CB2-611 | 305.5 | 17620 | -7.73 | -2.04 |       |
| CB2-612 | 306   | 17644 | -8.02 | -2.48 | 28.02 |
| CB2-613 | 306.5 | 17668 | -8.04 | -2.2  |       |
| CB2-614 | 307   | 17693 | -7.51 | -1.97 | 30.37 |
| CB2-615 | 307.5 | 17717 | -7.37 | -1.96 |       |
| CB2-616 | 308   | 17742 | -7.7  | -2.52 | 30.54 |
| CB2-617 | 308.5 | 17766 | -7.92 | -2.26 |       |
| CB2-618 | 309   | 17791 | -7.73 | -2.27 | 32.09 |
| CB2-619 | 309.5 | 17817 | -8.43 | -2.49 |       |
| CB2-620 | 310   | 17842 | -8.64 | -3.08 | 23.1  |
| CB2-621 | 310.5 | 17867 | -8.21 | -2.68 |       |
| CB2-622 | 311   | 17893 | -7.59 | -2.42 | 31.01 |
| CB2-623 | 311.5 | 17919 | -7.15 | -2.5  |       |
| CB2-624 | 312   | 17945 | -7.27 | -2.67 | 29.72 |

|         |       |       |       |       |       |
|---------|-------|-------|-------|-------|-------|
| CB2-625 | 312.5 | 17971 | -7.54 | -2.45 |       |
| CB2-626 | 313   | 17997 | -7.71 | -2.58 | 28.4  |
| CB2-627 | 313.5 | 18023 | -7.82 | -2.66 |       |
| CB2-628 | 314   | 18050 | -7.8  | -2.97 | 29.92 |
| CB2-629 | 314.5 | 18077 | -7.75 | -2.62 |       |
| CB2-630 | 315   | 18105 | -7.87 | -2.68 | 25.65 |
| CB2-631 | 315.5 | 18134 | -7.77 | -2.95 |       |
| CB2-632 | 316   | 18164 | -8.19 | -3.24 | 23.92 |
| CB2-633 | 316.5 | 18195 | -8.59 | -3.02 |       |
| CB2-634 | 317   | 18226 | -8.64 | -3.1  | 24.85 |
| CB2-635 | 317.5 | 18258 | -8.5  | -2.61 |       |
| CB2-636 | 318   | 18291 | -8.28 | -2.73 | 25.44 |
| CB2-637 | 318.5 | 18324 | -8.14 | -2.38 |       |
| CB2-638 | 319   | 18359 | -8.02 | -2.59 | 23.02 |
| CB2-639 | 319.5 | 18394 | -7.98 | -2.71 |       |
| CB2-640 | 320   | 18429 | -8.44 | -2.86 | 24.86 |
| CB2-641 | 320.5 | 18465 | -7.96 | -2.45 |       |
| CB2-642 | 321   | 18502 | -8.04 | -2.63 | 22.39 |
| CB2-643 | 321.5 | 18540 | -8.01 | -2.78 |       |
| CB2-644 | 322   | 18577 | -7.86 | -2.98 | 27.51 |
| CB2-645 | 322.5 | 18616 | -8.23 | -2.57 |       |
| CB2-646 | 323   | 18655 | -7.65 | -2.53 | 25.57 |
| CB2-647 | 323.5 | 18694 | -8.18 | -3.04 |       |
| CB2-648 | 324   | 18734 | -8.2  | -3.01 | 25.28 |
| CB2-649 | 324.5 | 18774 | -8.63 | -2.88 |       |
| CB2-650 | 325   | 18815 | -8.07 | -2.78 | 23.11 |
| CB2-651 | 325.5 | 18856 | -8.29 | -2.81 |       |
| CB2-652 | 326   | 18897 | -8.05 | -2.92 | 28.8  |
| CB2-653 | 326.5 | 18939 | -8.26 | -2.42 |       |
| CB2-654 | 327   | 18981 | -8.44 | -2.43 | 21.91 |
| CB2-655 | 327.5 | 19023 | -8.43 | -2.51 |       |
| CB2-656 | 328   | 19066 | -8.32 | -2.85 | 28.05 |
| CB2-657 | 328.5 | 19109 | -8.49 | -3.14 |       |
| CB2-658 | 329   | 19152 | -8.14 | -2.52 | 20.56 |
| CB2-659 | 329.5 | 19195 | -8.55 | -2.38 |       |
| CB2-660 | 330   | 19238 | -8.46 | -2.9  | 31.66 |

|         |       |       |       |       |       |
|---------|-------|-------|-------|-------|-------|
| CB2-661 | 330.5 | 19282 | -7.88 | -2.76 |       |
| CB2-662 | 331   | 19325 | -7.4  | -2.56 | 25.65 |
| CB2-663 | 331.5 | 19369 | -7.29 | -2.52 |       |
| CB2-664 | 332   | 19413 | -7.76 | -2.75 | 30.85 |
| CB2-665 | 332.5 | 19456 | -7.7  | -2.7  |       |
| CB2-666 | 333   | 19500 | -7.35 | -2.9  | 20.78 |
| CB2-667 | 333.5 | 19544 | -7.75 | -3.19 |       |
| CB2-668 | 334   | 19588 | -7.58 | -3.31 | 29.46 |
| CB2-669 | 334.5 | 19631 |       |       |       |
| CB2-670 | 335   | 19675 | -7.23 | -3.08 | 22.57 |
| CB2-671 | 335.5 | 19718 | -7.23 | -3.14 |       |
| CB2-672 | 336   | 19761 | -7.58 | -3.28 | 32.64 |
| CB2-673 | 336.5 | 19805 | -7.91 | -2.98 |       |
| CB2-674 | 337   | 19848 | -7.98 | -2.84 | 32.72 |
| CB2-675 | 337.5 | 19890 | -7.93 | -2.79 |       |
| CB2-676 | 338   | 19933 | -7.95 | -3.19 | 30.63 |
| CB2-677 | 338.5 | 19975 | -7.69 | -2.68 |       |
| CB2-678 | 339   | 20017 | -7.96 | -2.65 | 28.02 |
| CB2-679 | 339.5 | 20059 | -8.08 | -2.65 |       |
| CB2-680 | 340   | 20100 | -8.01 | -3.01 | 29.23 |
| CB2-681 | 340.5 | 20141 | -8.32 | -3.29 |       |
| CB2-682 | 341   | 20182 | -7.99 | -2.93 | 23.46 |
| CB2-683 | 341.5 | 20222 | -8.32 | -2.84 |       |
| CB2-684 | 342   | 20262 | -8.23 | -3.12 | 30.07 |
| CB2-685 | 342.5 | 20301 | -8.45 | -2.8  |       |
| CB2-686 | 343   | 20340 | -8.62 | -2.76 | 22.28 |
| CB2-687 | 343.5 | 20379 | -8.28 | -2.76 |       |
| CB2-688 | 344   | 20417 | -8.51 | -3.11 | 31.8  |
| CB2-689 | 344.5 | 20454 | -8.78 | -3.22 |       |
| CB2-690 | 345   | 20490 | -9.06 | -3.26 | 28.68 |
| CB2-691 | 345.5 | 20524 | -8.97 | -2.96 |       |
| CB2-692 | 346   | 20558 | -8.89 | -3.26 | 26.34 |
| CB2-693 | 346.5 | 20591 | -8.75 | -3.04 |       |
| CB2-694 | 347   | 20623 | -8.83 | -3.09 | 24.62 |
| CB2-695 | 347.5 | 20654 | -8.92 | -3.14 |       |
| CB2-696 | 348   | 20684 | -8.75 | -3.5  | 24.88 |

|         |       |       |       |       |       |
|---------|-------|-------|-------|-------|-------|
| CB2-697 | 348.5 | 20714 | -8.33 | -2.89 |       |
| CB2-698 | 349   | 20742 | -8.36 | -2.89 | 23.64 |
| CB2-699 | 349.5 | 20771 | -8.44 | -2.79 |       |
| CB2-700 | 350   | 20798 | -8.63 | -3.33 | 24.05 |
| CB2-701 | 350.5 | 20825 | -8.75 | -2.94 |       |
| CB2-702 | 351   | 20852 | -8.74 | -2.87 | 26.13 |
| CB2-703 | 351.5 | 20878 | -8.92 | -2.92 |       |
| CB2-704 | 352   | 20903 | -9.07 | -3.21 | 24.33 |
| CB2-705 | 352.5 | 20929 | -8.87 | -2.9  |       |
| CB2-706 | 353   | 20954 | -8.98 | -3.11 | 23.11 |
| CB2-707 | 353.5 | 20979 | -9.12 | -2.96 |       |
| CB2-708 | 354   | 21003 | -9.28 | -3.21 | 24.11 |
| CB2-709 | 354.5 | 21028 | -9.6  | -3.11 |       |
| CB2-710 | 355   | 21053 | -9.27 | -3.09 | 25.21 |
| CB2-711 | 355.5 | 21077 | -9.34 | -3.13 |       |
| CB2-712 | 356   | 21102 | -9.29 | -3.29 | 26.31 |
| CB2-713 | 356.5 | 21126 | -9.17 | -2.88 |       |
| CB2-714 | 357   | 21151 | -8.95 | -2.79 | 28.5  |
| CB2-715 | 357.5 | 21176 | -8.97 | -2.94 |       |
| CB2-716 | 358   | 21201 | -8.88 | -3.01 | 26.83 |
| CB2-717 | 358.5 | 21227 | -8.99 | -2.91 |       |
| CB2-718 | 359   | 21253 | -8.49 | -3.12 | 27.63 |
| CB2-719 | 359.5 | 21279 | -8.63 | -3.03 |       |
| CB2-720 | 360   | 21306 | -8.89 | -3.33 | 26.31 |
| CB2-721 | 360.5 | 21334 | -8.95 | -2.98 |       |
| CB2-722 | 361   | 21361 | -9.21 | -2.95 | 24.22 |
| CB2-723 | 361.5 | 21390 | -9.38 | -3.09 |       |
| CB2-724 | 362   | 21419 | -9.33 | -3    | 23.71 |
| CB2-725 | 362.5 | 21449 | -9.29 | -2.96 |       |
| CB2-726 | 363   | 21480 | -9.2  | -3.2  | 25.63 |
| CB2-727 | 363.5 | 21512 | -9.11 | -3.06 |       |
| CB2-728 | 364   | 21544 | -9.29 | -3.28 | 26.63 |
| CB2-729 | 364.5 | 21578 | -9.22 | -2.94 |       |
| CB2-730 | 365   | 21613 | -9.11 | -2.86 | 27.92 |
| CB2-731 | 365.5 | 21648 | -9.32 | -3.01 |       |

|         |       |       |        |       |       |
|---------|-------|-------|--------|-------|-------|
| CB2-732 | 366   | 21685 | -9.28  | -3.34 | 25.49 |
| CB2-733 | 366.5 | 21723 | -8.74  | -2.31 |       |
| CB2-734 | 367   | 21762 | -8.99  | -2.89 | 26.99 |
| CB2-735 | 367.5 | 21802 | -9.26  | -3.23 |       |
| CB2-736 | 368   | 21844 | -9.1   | -3.57 | 26.63 |
| CB2-737 | 368.5 | 21887 | -9.14  | -3.06 |       |
| CB2-738 | 369   | 21932 | -9.11  | -3.1  | 29.03 |
| CB2-739 | 369.5 | 21978 | -9.28  | -3.03 |       |
| CB2-740 | 370   | 22025 | -9.51  | -3.48 | 29.5  |
| CB2-741 | 370.5 | 22074 | -9.36  | -3.21 |       |
| CB2-742 | 371   | 22125 | -9.48  | -3.07 | 29.97 |
| CB2-743 | 371.5 | 22178 | -9.25  | -2.92 |       |
| CB2-744 | 372   | 22232 |        |       | 25.58 |
| CB2-745 | 372.5 | 22288 | -9.22  | -3.06 |       |
| CB2-746 | 373   | 22346 | -9.19  | -3.13 |       |
| CB2-747 | 373.5 | 22406 | -8.97  | -3.11 |       |
| CB2-748 | 374   | 22468 | -9.13  | -3.29 | 27.04 |
| CB2-749 | 374.5 | 22532 | -9.7   | -3.34 |       |
| CB2-750 | 375   | 22598 | -9.86  | -3.45 | 26.68 |
| CB2-751 | 375.5 | 22666 | -9.66  | -3.14 |       |
| CB2-752 | 376   | 22736 | -9.53  | -3.35 | 27.24 |
| CB2-753 | 376.5 | 22834 | -9.82  | -3.09 |       |
| CB2-754 | 377   | 22977 | -9.74  | -3.11 | 21.56 |
| CB2-755 | 377.5 | 23157 | -9.91  | -3.26 |       |
| CB2-756 | 378   | 23365 | -9.74  | -3.23 | 24.18 |
| CB2-757 | 378.5 | 23592 | -9.71  | -3.15 |       |
| CB2-758 | 379   | 23829 | -9.83  | -3.32 | 22.33 |
| CB2-759 | 379.5 | 24066 | -9.99  | -3.24 |       |
| CB2-760 | 380   | 24296 | -9.99  | -3.58 | 21.37 |
| CB2-761 | 380.5 | 24508 | -10.11 | -3.17 |       |
| CB2-762 | 381   | 24693 | -9.97  | -3.26 | 24.08 |
| CB2-763 | 381.5 | 24844 | -10    | -3.19 |       |
| CB2-764 | 382   | 24950 | -10.19 | -3.3  | 19.24 |
| CB2-765 | 382.5 | 25030 | -10.16 | -3    |       |

|         |       |       |       |       |       |
|---------|-------|-------|-------|-------|-------|
| CB2-766 | 383   | 25107 | -9.95 | -2.92 | 29.69 |
| CB2-767 | 383.5 | 25183 | -9.49 | -2.88 |       |
| CB2-768 | 384   | 25257 | -8.41 | -3.28 | 32.27 |
| CB2-769 | 384.5 | 25329 | -8.28 | -3.19 |       |
| CB2-770 | 385   | 25399 | -7.79 | -3.18 | 30.01 |
| CB2-771 | 385.5 | 25467 | -7.81 | -3.04 |       |
| CB2-772 | 386   | 25534 | -7.81 | -3.33 | 31.39 |
| CB2-773 | 386.5 | 25598 | -7.44 | -3.03 |       |
| CB2-774 | 387   | 25661 | -7.54 | -2.89 | 26.88 |
| CB2-775 | 387.5 | 25723 | -7.58 | -2.83 |       |
| CB2-776 | 388   | 25782 | -7.81 | -3.11 | 34.75 |
| CB2-777 | 388.5 | 25840 | -7.91 | -3.02 |       |
| CB2-778 | 389   | 25897 | -8.03 | -3.18 | 26.74 |
| CB2-779 | 389.5 | 25952 | -7.85 | -3.11 |       |
| CB2-780 | 390   | 26006 | -7.57 | -3.15 | 33.01 |
| CB2-781 | 390.5 | 26058 | -7.87 | -3.22 |       |
| CB2-782 | 391   | 26109 | -8.12 | -3.28 | 26.13 |
| CB2-783 | 391.5 | 26158 | -8.06 | -3.24 |       |
| CB2-784 | 392   | 26206 | -8.02 | -3.42 | 29.27 |
| CB2-785 | 392.5 | 26253 | -7.9  | -3.03 |       |
| CB2-786 | 393   | 26299 | -7.43 | -3    | 31.07 |
| CB2-787 | 393.5 | 26344 | -7.5  | -2.96 |       |
| CB2-788 | 394   | 26387 | -7.84 | -3.25 | 31.99 |
| CB2-789 | 394.5 | 26429 | -7.87 | -2.92 |       |
| CB2-790 | 395   | 26471 | -7.59 | -3.09 | 32.99 |
| CB2-791 | 395.5 | 26511 | -7.68 | -2.92 |       |
| CB2-792 | 396   | 26550 | -7.89 | -3.13 | 35.16 |
| CB2-793 | 396.5 | 26589 | -7.98 | -3.14 |       |
| CB2-794 | 397   | 26626 | -7.79 | -3.05 | 31.9  |
| CB2-795 | 397.5 | 26663 | -7.95 | -3.18 |       |
| CB2-796 | 398   | 26699 | -7.89 | -3.23 | 30.62 |
| CB2-797 | 398.5 | 26734 | -8.86 | -3.21 |       |
| CB2-798 | 399   | 26768 | -8.7  | -3.14 | 26.39 |
| CB2-799 | 399.5 | 26802 | -8.25 | -2.36 |       |

|         |       |       |       |       |       |
|---------|-------|-------|-------|-------|-------|
| CB2-800 | 400   | 26835 | -7.81 | -3.12 | 33.12 |
| CB2-801 | 400.5 | 26868 | -7.93 | -2.92 |       |
| CB2-802 | 401   | 26900 | -8.1  | -3.03 | 29.01 |
| CB2-803 | 401.5 | 26931 | -8.05 | -2.94 |       |
| CB2-804 | 402   | 26962 | -8.14 | -3.27 | 29.11 |
| CB2-805 | 402.5 | 26993 | -8.16 | -2.71 |       |
| CB2-806 | 403   | 27023 | -7.98 | -2.84 | 28.37 |
| CB2-807 | 403.5 | 27053 | -8.43 | -2.93 |       |
| CB2-808 | 404   | 27083 | -8.49 | -3.03 | 28.25 |
| CB2-809 | 404.5 | 27112 | -8.34 | -2.93 |       |
| CB2-810 | 405   | 27141 | -8.39 | -3.03 | 26.36 |
| CB2-811 | 405.5 | 27170 | -8.08 | -2.85 |       |
| CB2-812 | 406   | 27199 | -7.98 | -3.1  | 29.26 |
| CB2-813 | 406.5 | 27228 | -8.09 | -3.12 |       |
| CB2-814 | 407   | 27256 | -8.13 | -3.03 | 27.24 |
| CB2-815 | 407.5 | 27285 | -7.7  | -3.14 |       |
| CB2-816 | 408   | 27314 | -7.44 | -3.14 | 33.54 |
| CB2-817 | 408.5 | 27343 | -7.54 | -2.79 |       |
| CB2-818 | 409   | 27372 | -7.54 | -2.95 | 30.9  |
| CB2-819 | 409.5 | 27401 | -7.5  | -2.97 |       |
| CB2-820 | 410   | 27430 | -7.73 | -3.27 | 32.37 |
| CB2-821 | 410.5 | 27459 | -7.76 | -3.08 |       |
| CB2-822 | 411   | 27489 | -7.95 | -3.12 | 27.36 |
| CB2-823 | 411.5 | 27519 | -8.2  | -3.07 |       |
| CB2-824 | 412   | 27550 | -8.35 | -3.22 | 26.99 |
| CB2-825 | 412.5 | 27581 | -8.38 | -2.91 |       |
| CB2-826 | 413   | 27612 | -8.53 | -3.05 | 25.75 |
| CB2-827 | 413.5 | 27643 | -8.63 | -3.1  |       |
| CB2-828 | 414   | 27674 | -8.73 | -3.27 | 26.62 |
| CB2-829 | 414.5 | 27705 | -8.93 | -3.03 |       |
| CB2-830 | 415   | 27736 | -8.78 | -2.98 | 25.12 |
| CB2-831 | 415.5 | 27767 | -8.39 | -2.94 |       |
| CB2-832 | 416   | 27797 | -8.22 | -3.31 | 29.77 |
| CB2-833 | 416.5 | 27827 | -7.96 | -3.1  |       |

|         |       |       |       |       |       |
|---------|-------|-------|-------|-------|-------|
| CB2-834 | 417   | 27856 | -7.8  | -3.08 | 29.42 |
| CB2-835 | 417.5 | 27886 | -7.86 | -3.15 |       |
| CB2-836 | 418   | 27915 | -7.76 | -3.12 | 31.89 |
| CB2-837 | 418.5 | 27944 | -7.8  | -2.68 |       |
| CB2-838 | 419   | 27973 | -8.16 | -2.85 | 27.5  |
| CB2-839 | 419.5 | 28002 | -8.5  | -3.03 |       |
| CB2-840 | 420   | 28030 | -8.57 | -2.88 | 28.44 |
| CB2-841 | 420.5 | 28058 | -8.32 | -2.73 |       |
| CB2-842 | 421   | 28086 | -8.45 | -2.85 | 26.64 |
| CB2-843 | 421.5 | 28114 |       |       |       |
| CB2-844 | 422   | 28141 | -8.63 | -3.28 | 25.59 |
| CB2-845 | 422.5 | 28169 | -8.37 | -2.95 |       |
| CB2-846 | 423   | 28196 | -8.04 | -3.2  | 25.99 |
| CB2-847 | 423.5 | 28223 | -7.93 | -3.25 |       |
| CB2-848 | 424   | 28250 | -8.56 | -3.5  | 23.48 |
| CB2-849 | 424.5 | 28276 | -8.59 | -3.22 |       |
| CB2-850 | 425   | 28302 | -7.99 | -3.16 | 22.71 |
| CB2-851 | 425.5 | 28329 | -7.49 | -3.32 |       |
| CB2-852 | 426   | 28355 | -7.29 | -3.49 | 31.34 |
| CB2-853 | 426.5 | 28380 | -7.62 | -3.3  |       |
| CB2-854 | 427   | 28406 | -7.64 | -3.12 | 27.11 |
| CB2-855 | 427.5 | 28431 | -8.08 | -3.34 |       |
| CB2-856 | 428   | 28457 | -8.47 | -3.65 | 25.04 |
| CB2-857 | 428.5 | 28482 | -8.79 | -3.22 |       |
| CB2-858 | 429   | 28507 | -8.78 | -3.18 | 20.15 |
| CB2-859 | 429.5 | 28532 | -9.11 | -3.48 |       |
| CB2-860 | 430   | 28556 | -8.8  | -3.5  | 22.64 |
| CB2-861 | 430.5 | 28581 | -7.88 | -3.2  |       |
| CB2-862 | 431   | 28605 | -7.32 | -2.99 | 30.68 |
| CB2-863 | 431.5 | 28629 | -7.25 | -2.75 |       |
| CB2-864 | 432   | 28653 | -7.39 | -3.09 | 34.51 |
| CB2-865 | 432.5 | 28677 | -7.42 | -2.9  |       |
| CB2-866 | 433   | 28701 | -7.12 | -2.87 | 33.45 |
| CB2-867 | 433.5 | 28724 | -7.18 | -2.88 |       |

|         |       |       |       |       |       |
|---------|-------|-------|-------|-------|-------|
| CB2-868 | 434   | 28748 | -7.51 | -3.28 | 32.4  |
| CB2-869 | 434.5 | 28771 | -7.73 | -3.04 |       |
| CB2-870 | 435   | 28794 | -7.68 | -3.25 | 27.66 |
| CB2-871 | 435.5 | 28817 | -7.68 | -3.26 |       |
| CB2-872 | 436   | 28840 | -8.18 | -3.59 | 26.93 |
| CB2-873 | 436.5 | 28863 | -8.27 | -3.27 |       |
| CB2-874 | 437   | 28886 | -8.18 | -3.19 | 25.26 |
| CB2-875 | 437.5 | 28908 | -7.64 | -3.14 |       |
| CB2-876 | 438   | 28931 | -7.24 | -3.2  | 34.12 |
| CB2-877 | 438.5 | 28953 | -7.33 | -2.74 |       |
| CB2-878 | 439   | 28975 | -7.61 | -2.8  | 28.98 |
| CB2-879 | 439.5 | 28997 | -7.75 | -2.85 |       |
| CB2-880 | 440   | 29019 | -7.74 | -3.2  | 30.68 |
| CB2-881 | 440.5 | 29041 | -7.64 | -2.89 |       |
| CB2-882 | 441   | 29063 | -7.5  | -2.85 | 29.92 |
| CB2-883 | 441.5 | 29085 | -7.53 | -2.7  |       |
| CB2-884 | 442   | 29106 | -7.76 | -3.16 | 31.83 |
| CB2-885 | 442.5 | 29128 | -7.92 | -2.87 |       |
| CB2-886 | 443   | 29149 | -7.95 | -2.79 | 26.38 |
| CB2-887 | 443.5 | 29171 | -7.94 | -2.94 |       |
| CB2-888 | 444   | 29192 | -8.06 | -3.15 | 30.01 |
| CB2-889 | 444.5 | 29213 | -8.09 | -2.8  |       |
| CB2-890 | 445   | 29234 | -7.95 | -2.93 | 26.9  |
| CB2-891 | 445.5 | 29255 | -7.64 | -2.78 |       |
| CB2-892 | 446   | 29276 | -7.54 | -3.28 | 31.82 |
| CB2-893 | 446.5 | 29297 | -7.55 | -3.08 |       |
| CB2-894 | 447   | 29318 | -7.71 | -3.05 | 26.9  |
| CB2-895 | 447.5 | 29338 | -7.89 | -3.16 |       |
| CB2-896 | 448   | 29358 | -7.86 | -3.39 | 27.35 |
| CB2-897 | 448.5 | 29378 | -7.66 | -3.18 |       |
| CB2-898 | 449   | 29397 | -7.4  | -3.17 | 28.33 |
| CB2-899 | 449.5 | 29415 | -7.15 | -2.97 |       |
| CB2-900 | 450   | 29434 | -7.32 | -3.18 | 33.19 |
| CB2-901 | 450.5 | 29451 | -7.39 | -2.89 |       |

|         |       |       |       |       |       |
|---------|-------|-------|-------|-------|-------|
| CB2-902 | 451   | 29468 | -7.46 | -3.01 |       |
| CB2-903 | 451.5 | 29485 | -7.21 | -2.69 |       |
| CB2-904 | 452   | 29502 | -7.89 | -3.47 | 30.52 |
| CB2-905 | 452.5 | 29518 | -7.62 | -2.98 |       |
| CB2-906 | 453   | 29534 | -7.55 | -2.9  | 28.89 |
| CB2-907 | 453.5 | 29549 | -7.31 | -2.76 |       |
| CB2-908 | 454   | 29564 | -7.44 | -3.01 | 31.48 |
| CB2-909 | 454.5 | 29579 | -7.3  | -2.61 |       |
| CB2-910 | 455   | 29594 | -7.82 | -2.84 | 25.04 |
| CB2-911 | 455.5 | 29608 | -7.95 | -2.71 |       |
| CB2-912 | 456   | 29622 | -8.06 | -3.13 | 26.48 |
| CB2-913 | 456.5 | 29637 | -7.92 | -2.84 |       |
| CB2-914 | 457   | 29650 | -7.84 | -2.73 | 27.91 |
| CB2-915 | 457.5 | 29664 |       |       |       |
| CB2-916 | 458   | 29678 |       |       | 30.72 |
| CB2-917 | 458.5 | 29691 | -7.71 | -2.54 |       |
| CB2-918 | 459   | 29705 | -7.57 | -2.38 | 29.31 |
| CB2-919 | 459.5 | 29718 | -8.1  | -2.51 |       |
| CB2-920 | 460   | 29731 | -8.28 | -2.92 | 26.28 |
| CB2-921 | 460.5 | 29744 | -7.86 | -2.55 |       |
| CB2-922 | 461   | 29758 | -7.91 | -2.73 | 25.78 |
| CB2-923 | 461.5 | 29771 | -7.91 | -2.68 |       |
| CB2-924 | 462   | 29784 | -8.17 | -2.93 | 28.76 |
| CB2-925 | 462.5 | 29798 | -8.2  | -2.77 |       |
| CB2-926 | 463   | 29811 | -8.4  | -2.97 | 21.99 |
| CB2-927 | 463.5 | 29825 | -8.63 | -3.06 |       |
| CB2-928 | 464   | 29838 | -8.75 | -3.45 | 22.59 |
| CB2-929 | 464.5 | 29852 | -8.33 | -2.95 |       |
| CB2-930 | 465   | 29866 | -8.01 | -3.02 | 25.33 |
| CB2-931 | 465.5 | 29880 | -8.41 | -2.88 |       |
| CB2-932 | 466   | 29894 | -8.84 | -3.38 | 23.57 |
| CB2-933 | 466.5 | 29909 | -8.43 | -3.18 |       |
| CB2-934 | 467   | 29924 | -8.51 | -3.14 | 20.83 |
| CB2-935 | 467.5 | 29939 | -8.4  | -3.25 |       |

|         |       |       |       |       |       |
|---------|-------|-------|-------|-------|-------|
| CB2-936 | 468   | 29954 | -7.8  | -2.9  | 29.1  |
| CB2-937 | 468.5 | 29970 | -7.42 | -2.69 |       |
| CB2-938 | 469   | 29986 | -7.31 | -2.59 | 30.37 |
| CB2-939 | 469.5 | 30002 | -7.6  | -2.55 |       |
| CB2-940 | 470   | 30018 | -7.62 | -2.69 | 29.6  |
| CB2-941 | 470.5 | 30035 | -7.6  | -2.49 |       |
| CB2-942 | 471   | 30053 | -7.78 | -2.42 | 27.12 |
| CB2-943 | 471.5 | 30071 | -7.83 | -2.63 |       |
| CB2-944 | 472   | 30089 | -7.71 | -2.84 | 27.28 |
| CB2-945 | 472.5 | 30108 | -7.53 | -2.57 |       |
| CB2-946 | 473   | 30127 | -7.75 | -2.69 | 28.01 |
| CB2-947 | 473.5 | 30147 | -7.85 | -2.69 |       |
| CB2-948 | 474   | 30167 | -8.16 | -3    | 27.64 |
| CB2-949 | 474.5 | 30188 | -8.36 | -2.64 |       |
| CB2-950 | 475   | 30209 | -8.37 | -2.58 | 25.82 |
| CB2-951 | 475.5 | 30231 | -8.17 | -2.45 |       |
| CB2-952 | 476   | 30254 | -8.15 | -2.73 | 28.41 |
| CB2-953 | 476.5 | 30277 | -7.92 | -2.36 |       |
| CB2-954 | 477   | 30301 | -8.04 | -2.46 | 26.4  |
| CB2-955 | 477.5 | 30325 | -8.27 | -2.71 |       |
| CB2-956 | 478   | 30350 | -8.17 | -3.03 | 25.84 |
| CB2-957 | 478.5 | 30376 | -7.98 | -2.71 |       |
| CB2-958 | 479   | 30403 | -8.02 | -2.66 | 26.51 |
| CB2-959 | 479.5 | 30430 | -8.29 | -2.81 |       |
| CB2-960 | 480   | 30458 | -8.46 | -3.08 | 23.08 |
| CB2-961 | 480.5 | 30487 | -7.96 | -2.74 |       |
| CB2-962 | 481   | 30517 | -8.07 | -2.96 | 25.13 |
| CB2-963 | 481.5 | 30548 | -7.75 | -2.83 |       |
| CB2-964 | 482   | 30579 | -7.83 | -3.41 | 27.54 |
| CB2-965 | 482.5 | 30611 | -7.82 | -3.06 |       |
| CB2-966 | 483   | 30644 | -8.06 | -3.17 | 24.33 |
| CB2-967 | 483.5 | 30684 | -8.13 | -3.09 |       |
| CB2-968 | 484   | 30734 | -8.1  | -3.33 | 26.34 |
| CB2-969 | 484.5 | 30795 | -7.86 | -2.9  |       |
| CB2-970 | 485   | 30866 | -8.01 | -3.17 | 25.89 |
| CB2-971 | 485.5 | 30947 | -8.07 | -3.21 |       |

|          |       |       |       |       |       |
|----------|-------|-------|-------|-------|-------|
| CB2-972  | 486   | 31037 | -8.34 | -3.75 | 25.47 |
| CB2-973  | 486.5 | 31136 | -8.66 | -3.55 |       |
| CB2-974  | 487   | 31243 | -8.47 | -3.3  | 24.43 |
| CB2-975  | 487.5 | 31358 | -8.28 | -3.09 |       |
| CB2-976  | 488   | 31479 | -8.31 | -3.46 | 27.76 |
| CB2-977  | 488.5 | 31608 | -8.64 | -3.51 |       |
| CB2-978  | 489   | 31743 | -8.73 | -3.56 | 21.35 |
| CB2-979  | 489.5 | 31883 | -8.28 | -3.45 |       |
| CB2-980  | 490   | 32029 | -8.12 | -3.67 | 27.13 |
| CB2-981  | 490.5 | 32180 | -8.15 | -3.23 |       |
| CB2-982  | 491   | 32335 | -8.29 | -3.69 | 22.77 |
| CB2-983  | 491.5 | 32494 | -8.27 | -3.37 |       |
| CB2-984  | 492   | 32656 | -8.17 | -3.52 | 25.82 |
| CB2-985  | 492.5 | 32821 | -7.92 | -3.36 |       |
| CB2-986  | 493   | 32989 | -7.61 | -3.21 | 27.12 |
| CB2-987  | 493.5 | 33158 | -7.71 | -3.25 |       |
| CB2-988  | 494   | 33329 | -8.3  | -3.54 | 25.66 |
| CB2-989  | 494.5 | 33501 | -8.61 | -3.29 |       |
| CB2-990  | 495   | 33673 | -7.13 | -2.79 | 22.11 |
| CB2-991  | 495.5 | 33845 | -8.36 | -3.18 |       |
| CB2-992  | 496   | 34017 | -8.19 | -3.44 | 25.93 |
| CB2-993  | 496.5 | 34188 | -8.22 | -3.13 |       |
| CB2-994  | 497   | 34357 | -8.49 | -3.09 | 22.96 |
| CB2-1016 | 497.5 | 34524 | -8.46 | -3.29 | 23.87 |
| CB2-1017 | 498   | 34689 | -8.44 | -2.72 |       |
| CB2-1018 | 498.5 | 34850 | -8.91 | -2.73 | 20.6  |
| CB2-1019 | 499   | 35009 | -8.75 | -2.86 |       |
| CB2-1020 | 499.5 | 35163 | -8.59 | -3.34 | 24    |
| CB2-1021 | 500   | 35313 | -8.53 | -3.12 |       |
| CB2-1022 | 500.5 | 35458 | -8.35 | -3.13 | 23    |
| CB2-1023 | 501   | 35598 | -8.33 | -3.3  |       |
| CB2-1024 | 501.5 | 35732 | -8.25 | -3.49 | 22.6  |
| CB2-1025 | 502   | 35860 | -8.59 | -3.48 |       |
| CB2-1026 | 502.5 | 35980 | -8.6  | -3.22 | 21.59 |
| CB2-1027 | 503   | 36094 | -7.17 | -2.8  |       |
| CB2-1028 | 503.5 | 36200 | -7.44 | -3.07 | 32.49 |

|          |       |       |       |       |       |
|----------|-------|-------|-------|-------|-------|
| CB2-1029 | 504   | 36297 | -7.86 | -2.81 |       |
| CB2-1030 | 504.5 | 36386 | -8.24 | -3.01 | 27.46 |
| CB2-1031 | 505   | 36465 | -8.21 | -3.13 |       |
| CB2-1032 | 505.5 | 36535 | -8.02 | -3.42 | 33.83 |
| CB2-1033 | 506   | 36594 | -8.29 | -2.81 |       |
| CB2-1034 | 506.5 | 36643 | -8.17 | -2.81 | 32.99 |
| CB2-1035 | 507   | 36681 | -8.08 | -3    |       |
| CB2-1036 | 507.5 | 36712 | -8    | -3.28 | 33.25 |
| CB2-1037 | 508   | 36742 | -7.67 | -3.09 |       |
| CB2-1038 | 508.5 | 36771 | -7.54 | -2.76 | 32.15 |
| CB2-1039 | 509   | 36798 | -7.75 | -2.8  |       |
| CB2-1040 | 509.5 | 36824 | -7.79 | -2.97 | 33.06 |
| CB2-1041 | 510   | 36849 | -7.35 | -2.69 |       |
| CB2-1042 | 510.5 | 36874 | -7.27 | -2.8  | 31.02 |
| CB2-1043 | 511   | 36897 | -7.11 | -2.71 |       |
| CB2-1044 | 511.5 | 36919 | -8.06 | -3.27 | 30.89 |
| CB2-1045 | 512   | 36940 | -8.22 | -3.1  |       |
| CB2-1046 | 512.5 | 36960 | -8.09 | -2.94 | 29.43 |
| CB2-1047 | 513   | 36980 | -8.33 | -2.86 |       |
| CB2-1048 | 513.5 | 36999 | -8.1  | -3.21 | 32.32 |
| CB2-1049 | 514   | 37017 |       |       |       |
| CB2-1050 | 514.5 | 37034 | -7.7  | -2.68 | 35.6  |
| CB2-1051 | 515   | 37051 | -7.22 | -2.72 |       |
| CB2-1052 | 515.5 | 37067 | -7.62 | -3.21 | 30.07 |
| CB2-1053 | 516   | 37083 | -8.02 | -3.01 |       |
| CB2-1054 | 516.5 | 37099 | -8.25 | -3.17 | 26.72 |
| CB2-1055 | 517   | 37114 | -8.5  | -3.3  |       |
| CB2-1056 | 517.5 | 37128 | -8.46 | -3.19 | 25.57 |
| CB2-1057 | 518   | 37143 | -8.05 | -3.01 |       |
| CB2-1058 | 518.5 | 37157 | -8.26 | -3.17 | 23.34 |
| CB2-1059 | 519   | 37171 | -8.66 | -3.34 |       |
| CB2-1060 | 519.5 | 37185 | -8.8  | -3.59 | 21.97 |
| CB2-1061 | 520   | 37198 | -8.37 | -3.36 |       |
| CB2-1062 | 520.5 | 37212 | -7.5  | -2.82 | 26.54 |
| CB2-1063 | 521   | 37226 | -7.62 | -3.02 |       |
| CB2-1064 | 521.5 | 37240 | -7.45 | -3.08 | 27.24 |

|          |       |       |       |       |       |
|----------|-------|-------|-------|-------|-------|
| CB2-1065 | 522   | 37254 | -6.56 | -2.65 |       |
| CB2-1066 | 522.5 | 37268 | -6.8  | -2.94 | 28.83 |
| CB2-1067 | 523   | 37282 | -7.27 | -3.11 |       |
| CB2-1068 | 523.5 | 37297 | -8.2  | -3.67 | 21.84 |
| CB2-1069 | 524   | 37312 | -8.1  | -3.41 |       |
| CB2-1070 | 524.5 | 37327 | -7.56 | -3.14 | 27.21 |
| CB2-1071 | 525   | 37343 | -8.05 | -3.06 |       |
| CB2-1072 | 525.5 | 37360 | -8.15 | -3.26 | 25.88 |
| CB2-1073 | 526   | 37377 | -7.87 | -3.1  |       |
| CB2-1074 | 526.5 | 37394 | -8.06 | -3.05 | 25.26 |
| CB2-1075 | 527   | 37412 | -8.16 | -2.99 |       |
| CB2-1076 | 527.5 | 37431 | -7.91 | -3.14 | 26.36 |
| CB2-1077 | 528   | 37451 | -7.75 | -2.89 |       |
| CB2-1078 | 528.5 | 37471 | -7.48 | -2.86 | 26.07 |
| CB2-1079 | 529   | 37492 | -7.65 | -2.92 |       |
| CB2-1080 | 529.5 | 37514 | -8.12 | -3.23 | 22.99 |
| CB2-1081 | 530   | 37537 | -8.3  | -3.17 |       |
| CB2-1082 | 530.5 | 37562 | -8.17 | -2.88 | 21.89 |
| CB2-1083 | 531   | 37587 | -8.21 | -3.12 |       |
| CB2-1084 | 531.5 | 37613 | -7.88 | -3.21 | 24.89 |
| CB2-1085 | 532   | 37640 | -8.16 | -3.03 |       |
| CB2-1086 | 532.5 | 37669 | -8.16 | -3.26 | 23.15 |
| CB2-1087 | 533   | 37699 | -7.94 | -3.2  |       |
| CB2-1088 | 533.5 | 37734 | -8.06 | -3.4  | 24.78 |
| CB2-1089 | 534   | 37776 | -7.54 | -3.05 |       |
| CB2-1090 | 534.5 | 37826 | -7.3  | -2.95 | 28.02 |
| CB2-1091 | 535   | 37884 | -7.5  | -2.84 |       |
| CB2-1092 | 535.5 | 37948 | -7.68 | -3.09 | 25.39 |
| CB2-1093 | 536   | 38019 | -8.4  | -3    |       |
| CB2-1094 | 536.5 | 38096 | -7.98 | -2.7  | 23.8  |
| CB2-1095 | 537   | 38179 | -8.27 | -3.08 |       |
| CB2-1096 | 537.5 | 38268 | -8.22 | -3.34 | 23.93 |
| CB2-1097 | 538   | 38361 | -8.42 | -3.25 |       |
| CB2-1098 | 538.5 | 38460 | -8.32 | -3.13 | 24.15 |
| CB2-1099 | 539   | 38563 | -8.28 | -3.04 |       |
| CB2-1100 | 539.5 | 38670 | -8.46 | -3.33 | 25.76 |

|          |       |       |        |       |       |
|----------|-------|-------|--------|-------|-------|
| CB2-1101 | 540   | 38781 | -8.37  | -3.14 |       |
| CB2-1102 | 540.5 | 38896 | -8.03  | -3.05 | 26.8  |
| CB2-1103 | 541   | 39013 | -7.87  | -2.93 |       |
| CB2-1104 | 541.5 | 39134 | -8.55  | -3.26 | 29.1  |
| CB2-1105 | 542   | 39256 | -8.73  | -3.18 |       |
| CB2-1106 | 542.5 | 39381 | -9.67  | -3.42 | 19.76 |
| CB2-1107 | 543   | 39508 | -9.67  | -3.34 |       |
| CB2-1108 | 543.5 | 39636 | -10.08 | -3.63 | 20.4  |
| CB2-1109 | 544   | 39765 | -9.9   | -3.26 |       |
| CB2-1110 | 544.5 | 39895 | -8.4   | -3.2  | 31.91 |
| CB2-1111 | 545   | 40026 | -8.05  | -3    |       |
| CB2-1112 | 545.5 | 40156 | -8.07  | -3.26 | 37.34 |
| CB2-1113 | 546   | 40286 | -8.41  | -3.25 |       |
| CB2-1114 | 546.5 | 40416 | -8.57  | -3.18 | 31.75 |
| CB2-1115 | 547   | 40544 | -8.51  | -3.19 |       |
| CB2-1116 | 547.5 | 40671 | -8.57  | -3.3  | 34.61 |
| CB2-1117 | 548   | 40797 | -8.03  | -3.19 |       |
| CB2-1118 | 548.5 | 40920 | -7.66  | -3.06 | 30.71 |
| CB2-1119 | 549   | 41041 | -7.44  | -3.17 |       |
| CB2-1120 | 549.5 | 41160 | -7.7   | -3.04 | 31.29 |
| CB2-1121 | 550   | 41275 | -7.86  | -3.16 |       |
| CB2-1122 | 550.5 | 41387 | -7.45  | -3.07 | 27.8  |
| CB2-1123 | 551   | 41496 | -7.7   | -3.17 |       |
| CB2-1124 | 551.5 | 41600 | -7.54  | -3.23 | 29.8  |
| CB2-1125 | 552   | 41700 | -7.15  | -3.21 |       |
| CB2-1126 | 552.5 | 41795 | -7.08  | -3.28 | 27.37 |
| CB2-1127 | 553   | 41885 | -7.14  | -3.16 |       |
| CB2-1128 | 553.5 | 41970 | -8.28  | -3.61 | 23.56 |
| CB2-1129 | 554   | 42049 | -7.83  | -3.31 |       |
| CB2-1130 | 554.5 | 42122 | -8     | -3.49 | 22.97 |
| CB2-1131 | 555   | 42188 | -8.1   | -3.18 |       |
| CB2-1132 | 555.5 | 42247 | -7.78  | -3.2  | 28.24 |
| CB2-1133 | 556   | 42300 | -7.28  | -3.02 |       |
| CB2-1134 | 556.5 | 42348 | -7.18  | -2.83 | 27.75 |
| CB2-1135 | 557   | 42395 | -6.66  | -2.69 |       |
| CB2-1136 | 557.5 | 42441 | -6.34  | -3.02 | 35.79 |

|          |       |       |        |       |       |
|----------|-------|-------|--------|-------|-------|
| CB2-1137 | 558   | 42485 | -6.08  | -2.55 |       |
| CB2-1138 | 558.5 | 42529 | -6.52  | -2.56 | 30.36 |
| CB2-1139 | 559   | 42572 | -6.51  | -2.68 |       |
| CB2-1140 | 559.5 | 42614 | -6.97  | -2.94 | 31.28 |
| CB2-1141 | 560   | 42656 | -7.01  | -2.85 |       |
| CB2-1142 | 560.5 | 42696 | -6.96  | -2.72 | 30.34 |
| CB2-1143 | 561   | 42736 | -6.83  | -2.68 |       |
| CB2-1144 | 561.5 | 42775 | -7.1   | -2.94 | 30.6  |
| CB2-1145 | 562   | 42814 | -6.91  | -2.57 |       |
| CB2-1146 | 562.5 | 42852 | -6.9   | -2.67 | 29.04 |
| CB2-1147 | 563   | 42890 | -6.86  | -2.65 |       |
| CB2-1148 | 563.5 | 42927 | -7.4   | -2.85 | 32.35 |
| CB2-1149 | 564   | 42964 | -7.44  | -2.84 |       |
| CB2-1150 | 564.5 | 43001 | -7.35  | -2.83 | 29.58 |
| CB2-1151 | 565   | 43037 | -7.51  | -2.79 |       |
| CB2-1152 | 565.5 | 43073 | -7.52  | -2.95 | 35.39 |
| CB2-1153 | 566   | 43110 | -7.61  | -2.63 |       |
| CB2-1154 | 566.5 | 43146 | -7.98  | -3.2  | 26.24 |
| CB2-1155 | 567   | 43182 | -7.52  | -3.28 |       |
| CB2-1156 | 567.5 | 43218 | -7.85  | -3.56 | 23.88 |
| CB2-1157 | 568   | 43255 | -7.46  | -3.3  |       |
| CB2-1158 | 568.5 | 43291 | -7.62  | -3.31 | 25.22 |
| CB2-1159 | 569   | 43328 | -7.22  | -3.28 |       |
| CB2-1160 | 569.5 | 43366 | -7.27  | -3.61 | 33.07 |
| CB2-1161 | 570   | 43403 | -7.44  | -3.46 |       |
| CB2-1162 | 570.5 | 43441 | -8.06  | -3.37 | 27.15 |
| CB2-1163 | 571   | 43480 | -9.17  | -3.37 |       |
| CB2-1164 | 571.5 | 43519 | -9.68  | -3.78 | 33.59 |
| CB2-1165 | 572   | 43558 | -9.57  | -3.32 |       |
| CB2-1166 | 572.5 | 43599 | -9.41  | -3.33 | 30.97 |
| CB2-1167 | 573   | 43640 | -9.68  | -3.42 |       |
| CB2-1168 | 573.5 | 43681 | -9.67  | -3.98 | 28.79 |
| CB2-1169 | 574   | 43724 | -9.75  | -3.44 |       |
| CB2-1170 | 574.5 | 43768 | -10.66 | -3.9  | 20.94 |
| CB2-1171 | 575   | 43812 | -10.35 | -3.91 |       |
| CB2-1172 | 575.5 | 43858 | -10.36 | -4.41 | 22.21 |

|          |       |       |        |       |       |
|----------|-------|-------|--------|-------|-------|
| CB2-1173 | 576   | 43904 | -10.25 | -4.05 |       |
| CB2-1174 | 576.5 | 43952 | -10.05 | -3.98 | 20.16 |
| CB2-1175 | 577   | 44001 | -9.73  | -3.82 |       |
| CB2-1176 | 577.5 | 44064 | -9.76  | -3.97 | 28.26 |
| CB2-1177 | 578   | 44152 | -9.87  | -3.64 |       |
| CB2-1178 | 578.5 | 44258 | -9.76  | -3.43 | 27.22 |
| CB2-1179 | 579   | 44376 | -9.58  | -3.56 |       |
| CB2-1180 | 579.5 | 44500 | -9.57  | -3.97 | 26.17 |
| CB2-1181 | 580   | 44624 | -8.66  | -3.39 |       |
| CB2-1182 | 580.5 | 44742 | -8.21  | -3.35 | 25.48 |
| CB2-1183 | 581   | 44848 | -7.68  | -3.49 |       |
| CB2-1184 | 581.5 | 44935 | -7.39  | -3.95 | 29.5  |
| CB2-1185 | 582   | 44998 | -7.15  | -3.65 |       |
| CB2-1186 | 582.5 | 45046 | -7.05  | -3.58 | 26.61 |
| CB2-1187 | 583   | 45095 | -7.23  | -3.76 |       |
| CB2-1188 | 583.5 | 45144 | -7.47  | -4.06 | 28.64 |
| CB2-1189 | 584   | 45193 | -7.15  | -3.66 |       |
| CB2-1190 | 584.5 | 45243 | -7.09  | -3.59 | 24.88 |
| CB2-1191 | 585   | 45292 | -7.13  | -3.68 |       |
| CB2-1192 | 585.5 | 45342 | -7.6   | -3.87 | 28.27 |
| CB2-1193 | 586   | 45391 | -7.97  | -3.55 |       |
| CB2-1194 | 586.5 | 45441 | -7.83  | -3.52 | 23.11 |
| CB2-1195 | 587   | 45490 | -7.84  | -3.4  |       |
| CB2-1196 | 587.5 | 45539 | -7.97  | -3.61 | 27.25 |
| CB2-1197 | 588   | 45588 | -7.72  | -3.61 |       |
| CB2-1198 | 588.5 | 45636 | -7.55  | -3.62 | 25.48 |
| CB2-1199 | 589   | 45684 | -7.67  | -3.62 |       |
| CB2-1200 | 589.5 | 45732 | -7.85  | -4    | 30.05 |
| CB2-1201 | 590   | 45779 | -7.77  | -3.44 |       |
| CB2-1202 | 590.5 | 45826 | -7.88  | -3.31 | 28.04 |
| CB2-1203 | 591   | 45872 | -8.13  | -3.3  |       |
| CB2-1204 | 591.5 | 45918 | -8.46  | -3.85 | 27.32 |
| CB2-1205 | 592   | 45963 | -8.38  | -3.39 |       |
| CB2-1206 | 592.5 | 46007 | -8.31  | -3.59 | 25.38 |
| CB2-1207 | 593   | 46051 | -8.57  | -3.45 |       |
| CB2-1208 | 593.5 | 46094 | -8.5   | -3.73 | 28.02 |

|          |       |       |        |       |       |
|----------|-------|-------|--------|-------|-------|
| CB2-1209 | 594   | 46136 | -8.96  | -3.54 |       |
| CB2-1210 | 594.5 | 46177 | -9.26  | -3.54 | 21.51 |
| CB2-1211 | 595   | 46217 | -9.06  | -3.64 |       |
| CB2-1212 | 595.5 | 46256 | -8.56  | -3.64 | 28.06 |
| CB2-1213 | 596   | 46294 | -8.46  | -3.4  |       |
| CB2-1214 | 596.5 | 46331 | -8.62  | -3.35 | 28.32 |
| CB2-1215 | 597   | 46367 | -8.58  | -3.27 |       |
| CB2-1216 | 597.5 | 46402 | -8.52  | -3.79 | 28.58 |
| CB2-1217 | 598   | 46435 | -8.42  | -3.65 |       |
| CB2-1218 | 598.5 | 46467 | -8.51  | -3.74 | 24.04 |
| CB2-1219 | 599   | 46498 | -8.48  | -3.67 |       |
| CB2-1220 | 599.5 | 46528 | -8.88  | -4.22 | 23.64 |
| CB2-1221 | 600   | 46555 | -8.89  | -3.88 |       |
| CB2-1222 | 600.5 | 46582 | -9.02  | -3.7  | 23.43 |
| CB2-1223 | 601   | 46607 | -8.92  | -3.5  |       |
| CB2-1224 | 601.5 | 46630 | -9.18  | -3.79 | 25.94 |
| CB2-1225 | 602   | 46652 | -8.99  | -3.22 |       |
| CB2-1226 | 602.5 | 46672 | -8.95  | -3.26 | 25.87 |
| CB2-1227 | 603   | 46690 | -9.08  | -3.14 |       |
| CB2-1228 | 603.5 | 46707 | -9.26  | -3.62 | 28.83 |
| CB2-1229 | 604   | 46724 | -9.15  | -3.31 |       |
| CB2-1230 | 604.5 | 46741 | -9.44  | -3.42 | 22.32 |
| CB2-1231 | 605   | 46757 | -9.36  | -3.39 |       |
| CB2-1232 | 605.5 | 46773 | -10.26 | -4.13 | 19.06 |
| CB2-1233 | 606   | 46788 | -10.5  | -3.68 |       |
| CB2-1234 | 606.5 | 46804 | -10.03 | -3.55 | 17.88 |
| CB2-1235 | 607   | 46819 | -9.42  | -3.36 |       |
| CB2-1236 | 607.5 | 46834 | -9.39  | -3.77 | 27.7  |
| CB2-1237 | 608   | 46848 | -8.63  | -3.4  |       |
| CB2-1238 | 608.5 | 46863 | -9.15  | -3.51 | 22.69 |
| CB2-1239 | 609   | 46877 | -9.76  | -3.6  |       |
| CB2-1240 | 609.5 | 46891 | -9.85  | -4.03 | 21.07 |
| CB2-1241 | 610   | 46905 | -9.03  | -3.45 |       |
| CB2-1242 | 610.5 | 46919 | -9.08  | -3.48 | 24.96 |
| CB2-1243 | 611   | 46932 | -8.9   | -3.48 |       |
| CB2-1244 | 611.5 | 46946 | -8.92  | -3.68 | 28.94 |

|          |       |       |        |       |       |
|----------|-------|-------|--------|-------|-------|
| CB2-1245 | 612   | 46959 | -8.96  | -3.23 |       |
| CB2-1246 | 612.5 | 46972 | -9.18  | -3.39 | 23.31 |
| CB2-1247 | 613   | 46985 | -9.81  | -3.6  |       |
| CB2-1248 | 613.5 | 46999 | -9.63  | -4.15 | 22.65 |
| CB2-1249 | 614   | 47011 | -9.06  | -3.47 |       |
| CB2-1250 | 614.5 | 47024 | -8.85  | -3.58 | 24.98 |
| CB2-1251 | 615   | 47037 | -8.84  | -3.56 |       |
| CB2-1252 | 615.5 | 47050 | -9.3   | -4.04 | 25.01 |
| CB2-1253 | 616   | 47063 | -10.12 | -3.68 |       |
| CB2-1254 | 616.5 | 47076 | -10.3  | -4.15 | 18.83 |
| CB2-1255 | 617   | 47088 | -9.66  | -3.8  |       |
| CB2-1256 | 617.5 | 47101 | -9.64  | -4.05 | 22.32 |
| CB2-1257 | 618   | 47114 | -9.66  | -3.66 |       |
| CB2-1258 | 618.5 | 47127 | -9.1   | -3.6  | 25.28 |
| CB2-1259 | 619   | 47140 | -9.06  | -3.55 |       |
| CB2-1260 | 619.5 | 47153 | -9.19  | -3.78 | 27.64 |
| CB2-1261 | 620   | 47166 | -8.91  | -3.22 |       |
| CB2-1262 | 620.5 | 47179 | -8.77  | -3.16 | 31.77 |
| CB2-1263 | 621   | 47192 | -8.78  | -3.19 |       |
| CB2-1264 | 621.5 | 47206 | -9.11  | -3.55 | 27.97 |
| CB2-1265 | 622   | 47219 | -8.76  | -2.96 |       |
| CB2-1266 | 622.5 | 47233 | -8.6   | -3.12 | 30.15 |
| CB2-1267 | 623   | 47247 | -8.96  | -2.98 |       |
| CB2-1268 | 623.5 | 47261 | -9.06  | -3.47 | 29.03 |
| CB2-1269 | 624   | 47275 | -8.62  | -3.14 |       |
| CB2-1270 | 624.5 | 47290 | -8.48  | -3.12 | 31.29 |
| CB2-1271 | 625   | 47304 | -8.33  | -2.98 |       |
| CB2-1272 | 625.5 | 47319 | -8.56  | -3.58 | 29.49 |
| CB2-1273 | 626   | 47335 | -8.52  | -3.18 |       |
| CB2-1274 | 626.5 | 47351 | -8.53  | -3.27 | 29.74 |
| CB2-1275 | 627   | 47367 | -8.4   | -3.2  |       |
| CB2-1276 | 627.5 | 47384 | -8.4   | -3.29 | 32.07 |
| CB2-1277 | 628   | 47400 | -8.36  | -3.05 |       |
| CB2-1278 | 628.5 | 47418 | -8.41  | -3.09 | 32.59 |
| CB2-1279 | 629   | 47435 | -8.61  | -3.13 |       |
| CB2-1280 | 629.5 | 47453 | -8.82  | -3.5  | 28.76 |

|          |       |       |       |       |       |
|----------|-------|-------|-------|-------|-------|
| CB2-1281 | 630   | 47471 | -8.72 | -3.14 |       |
| CB2-1282 | 630.5 | 47489 | -8.55 | -2.94 | 28.74 |
| CB2-1283 | 631   | 47508 | -8.4  | -3.02 |       |
| CB2-1284 | 631.5 | 47527 | -8.44 | -3.03 | 17.86 |
| CB2-1285 | 632   | 47547 | -7.44 | -3.31 |       |
| CB2-1286 | 632.5 | 47566 | -7.55 | -3.15 | 34.77 |
| CB2-1287 | 633   | 47586 | -7.42 | -3.18 |       |
| CB2-1288 | 633.5 | 47606 | -7.54 | -3.39 | 34.07 |
| CB2-1289 | 634   | 47627 | -7.58 | -3.08 |       |
| CB2-1290 | 634.5 | 47648 | -7.53 | -3.09 | 34.98 |
| CB2-1291 | 635   | 47669 | -7.75 | -3.28 |       |
| CB2-1292 | 635.5 | 47690 | -7.82 | -3.38 | 31.37 |
| CB2-1293 | 636   | 47711 | -7.94 | -3.17 |       |
| CB2-1294 | 636.5 | 47733 | -7.93 | -3.08 | 31.5  |
| CB2-1295 | 637   | 47755 | -8.07 | -3.13 |       |
| CB2-1296 | 637.5 | 47778 | -8.04 | -3.29 | 31.47 |
| CB2-1297 | 638   | 47800 | -8.13 | -3.1  |       |
| CB2-1298 | 638.5 | 47823 | -7.9  | -3.03 | 31.38 |
| CB2-1299 | 639   | 47846 | -7.18 | -2.95 |       |
| CB2-1300 | 639.5 | 47869 | -6.82 | -3.36 | 30.81 |
| CB2-1301 | 640   | 47893 | -6.78 | -3.08 |       |
| CB2-1302 | 640.5 | 47917 | -6.95 | -3.1  | 32.87 |
| CB2-1303 | 641   | 47941 | -7.48 | -3.23 |       |
| CB2-1304 | 641.5 | 47965 | -7.6  | -3.12 | 32.83 |
| CB2-1305 | 642   | 47989 | -7.46 | -2.87 |       |
| CB2-1306 | 642.5 | 48014 | -7.43 | -2.97 | 31.99 |
| CB2-1307 | 643   | 48039 | -7.26 | -2.97 |       |
| CB2-1308 | 643.5 | 48064 | -7.26 | -3.39 | 30.48 |
| CB2-1309 | 644   | 48089 | -7.68 | -3.2  |       |
| CB2-1310 | 644.5 | 48115 | -7.84 | -3.11 | 29.72 |
| CB2-1311 | 645   | 48140 | -7.97 | -3.1  |       |
| CB2-1312 | 645.5 | 48166 | -8.04 | -3.16 | 31.23 |
| CB2-1313 | 646   | 48192 | -7.82 | -2.93 |       |
| CB2-1314 | 646.5 | 48218 | -7.63 | -2.57 | 31.38 |
| CB2-1315 | 647   | 48245 | -7.62 | -2.64 |       |
| CB2-1316 | 647.5 | 48271 | -7.63 | -3.15 | 30.54 |

|          |       |       |        |       |       |
|----------|-------|-------|--------|-------|-------|
| CB2-1317 | 648   | 48298 | -8.12  | -3.02 |       |
| CB2-1318 | 648.5 | 48325 | -8.07  | -3.03 | 28.44 |
| CB2-1319 | 649   | 48352 | -7.75  | -2.75 |       |
| CB2-1320 | 649.5 | 48379 | -7.86  | -3.09 | 30.81 |
| CB2-1321 | 650   | 48406 | -7.72  | -2.66 |       |
| CB2-1322 | 650.5 | 48434 | -7.4   | -2.47 | 29.42 |
| CB2-1323 | 651   | 48461 | -7.39  | -2.48 |       |
| CB2-1324 | 651.5 | 48489 | -7.73  | -3.07 | 30.26 |
| CB2-1325 | 652   | 48517 | -7.9   | -3.16 |       |
| CB2-1326 | 652.5 | 48545 | -7.85  | -3.47 |       |
| CB2-1327 | 653   | 48573 | -7.88  | -3.57 |       |
| CB2-1328 | 653.5 | 48601 | -8.06  | -3.74 | 30.89 |
| CB2-1329 | 654   | 48630 | -7.65  | -3.61 |       |
| CB2-1330 | 654.5 | 48658 | -7.75  | -3.42 | 30.52 |
| CB2-1331 | 655   | 48687 | -8.01  | -3.29 |       |
| CB2-1332 | 655.5 | 48716 | -8.14  | -3.34 | 33.74 |
| CB2-1333 | 656   | 48745 | -8.73  | -3.65 |       |
| CB2-1334 | 656.5 | 48774 | -9.03  | -3.81 | 32.52 |
| CB2-1335 | 657   | 48803 | -9.32  | -3.97 |       |
| CB2-1336 | 657.5 | 48832 | -8.44  | -3.45 | 30.3  |
| CB2-1337 | 658   | 48861 | -9.73  | -4.26 |       |
| CB2-1338 | 658.5 | 48890 | -9.15  | -3.99 | 30.1  |
| CB2-1339 | 659   | 48920 | -9.47  | -3.96 |       |
| CB2-1340 | 659.5 | 48949 | -7.82  | -3.41 | 31.72 |
| CB2-1341 | 660   | 48978 | -10.34 | -3.93 |       |
| CB2-1342 | 660.5 | 49008 | -10.62 | -3.74 | 27.46 |
| CB2-1343 | 661   | 49038 | -10.59 | -3.74 |       |
| CB2-1344 | 661.5 | 49067 | -8.64  | -3.05 | 29.68 |
| CB2-1345 | 662   | 49097 | -10.29 | -3.89 |       |
| CB2-1346 | 662.5 | 49127 | -10.44 | -3.93 | 28.66 |
| CB2-1347 | 663   | 49157 | -10.3  | -3.7  |       |
| CB2-1348 | 663.5 | 49187 | -8.54  | -3.2  | 29.92 |
| CB2-1349 | 664   | 49217 | -10.5  | -4.06 |       |
| CB2-1350 | 664.5 | 49247 | -10.39 | -4    | 27.64 |
| CB2-1351 | 665   | 49277 | -10.36 | -3.89 |       |
| CB2-1352 | 665.5 | 49307 | -8.7   | -3.47 | 29.25 |

|          |       |       |        |       |       |
|----------|-------|-------|--------|-------|-------|
| CB2-1353 | 666   | 49337 | -10.75 | -3.85 |       |
| CB2-1354 | 666.5 | 49367 | -10.95 | -3.89 | 25.5  |
| CB2-1355 | 667   | 49399 | -10.63 | -4.3  |       |
| CB2-1356 | 667.5 | 49431 | -8.5   | -3.28 | 28.63 |
| CB2-1357 | 668   | 49464 | -10.44 | -4.16 |       |
| CB2-1358 | 668.5 | 49498 | -10.63 | -4.29 | 25.47 |
| CB2-1359 | 669   | 49532 | -10.69 | -4.22 |       |
| CB2-1360 | 669.5 | 49568 | -8.88  | -3.55 | 27.88 |
| CB2-1361 | 670   | 49604 | -11.02 | -4.19 |       |
| CB2-1362 | 670.5 | 49640 | -10.98 | -4.26 | 26.93 |
| CB2-1363 | 671   | 49678 | -11.01 | -4.43 |       |
| CB2-1364 | 671.5 | 49716 | -9.15  | -3.32 | 28.44 |
| CB2-1365 | 672   | 49754 | -10.98 | -4.29 |       |
| CB2-1366 | 672.5 | 49794 | -10.82 | -4.28 | 25.34 |
| CB2-1367 | 673   | 49833 | -9.17  | -3.3  |       |
| CB2-1368 | 673.5 | 49874 | -9.05  | -3.43 | 27.6  |
| CB2-1369 | 674   | 49914 | -9.18  | -2.97 |       |
| CB2-1370 | 674.5 | 49956 | -9.12  | -3.17 | 27.47 |
| CB2-1371 | 675   | 49997 | -9.19  | -3.09 |       |
| CB2-1372 | 675.5 | 50039 | -9.28  | -3.39 | 27.34 |
| CB2-1373 | 676   | 50082 | -9.44  | -3.22 |       |
| CB2-1374 | 676.5 | 50125 | -9.48  | -3.2  | 25.15 |
| CB2-1375 | 677   | 50168 | -9.33  | -3.36 |       |
| CB2-1376 | 677.5 | 50212 | -9.26  | -3.57 | 28.57 |
| CB2-1377 | 678   | 50255 | -9.16  | -3.42 |       |
| CB2-1378 | 678.5 | 50300 | -9.1   | -3.29 | 27.02 |
| CB2-1379 | 679   | 50344 | -9.36  | -3.26 |       |
| CB2-1380 | 679.5 | 50388 | -9.53  | -3.44 | 26.23 |
| CB2-1381 | 680   | 50433 | -9.36  | -3.28 |       |
| CB2-1382 | 680.5 | 50478 | -9.38  | -3.3  | 25.48 |
| CB2-1383 | 681   | 50523 | -9.65  | -3.24 |       |
| CB2-1384 | 681.5 | 50568 | -9.69  | -3.55 | 26.53 |
| CB2-1385 | 682   | 50613 | -9.57  | -3.11 |       |
| CB2-1386 | 682.5 | 50659 | -9.54  | -3.24 | 27.22 |
| CB2-1387 | 683   | 50704 | -9.47  | -3.23 |       |
| CB2-1388 | 683.5 | 50749 | -8.95  | -3.37 | 27.9  |

|          |       |       |        |       |       |
|----------|-------|-------|--------|-------|-------|
| CB2-1389 | 684   | 50794 | -9.46  | -3.19 |       |
| CB2-1390 | 684.5 | 50840 | -9.48  | -3.11 | 25.29 |
| CB2-1391 | 685   | 50885 | -9.61  | -3.09 |       |
| CB2-1392 | 685.5 | 50930 | -8.98  | -3.28 | 26.95 |
| CB2-1393 | 686   | 50975 | -9.61  | -3.09 |       |
| CB2-1394 | 686.5 | 51019 | -9.7   | -3.11 | 24.94 |
| CB2-1395 | 687   | 51064 | -9.38  | -3.27 |       |
| CB2-1396 | 687.5 | 51108 | -9.3   | -3.46 | 28.51 |
| CB2-1397 | 688   | 51152 | -9.31  | -3.1  |       |
| CB2-1398 | 688.5 | 51196 | -9.31  | -2.97 | 28.68 |
| CB2-1399 | 689   | 51239 | -9.53  | -3.14 |       |
| CB2-1400 | 689.5 | 51283 | -9.59  | -3.49 | 29.05 |
| CB2-1401 | 690   | 51325 | -10.21 | -3.57 |       |
| CB2-1402 | 690.5 | 51368 | -10.25 | -3.32 | 26.15 |
| CB2-1403 | 691   | 51412 | -10.08 | -3.34 |       |
| CB2-1404 | 691.5 | 51456 | -10.25 | -3.57 | 25.82 |
| CB2-1405 | 692   | 51500 | -10.07 | -3.47 |       |
| CB2-1406 | 692.5 | 51545 | -9.95  | -3.13 | 24.51 |
| CB2-1407 | 693   | 51590 | -9.85  | -3.01 |       |
| CB2-1408 | 693.5 | 51635 | -9.89  | -3.22 | 26.85 |
| CB2-1409 | 694   | 51681 | -9.55  | -3.01 |       |
| CB2-1410 | 694.5 | 51727 | -9.07  | -3.01 | 29.19 |
| CB2-1411 | 695   | 51773 | -9.35  | -2.99 |       |
| CB2-1412 | 695.5 | 51820 | -9.76  | -2.99 | 30.76 |
| CB2-1413 | 696   | 51867 | -10.16 | -3.17 |       |
| CB2-1414 | 696.5 | 51914 | -10.32 | -3.21 | 23.2  |
| CB2-1415 | 697   | 51961 | -10.1  | -3.16 |       |
| CB2-1416 | 697.5 | 52008 | -10.11 | -3.32 | 28.82 |
| CB2-1417 | 698   | 52056 | -10.02 | -3.32 |       |
| CB2-1418 | 698.5 | 52103 | -9.67  | -3.37 | 27.75 |
| CB2-1419 | 699   | 52151 | -9.61  | -3.27 |       |
| CB2-1420 | 699.5 | 52199 | -9.98  | -3.46 | 25.67 |
| CB2-1421 | 700   | 52247 | -10.04 | -3.29 |       |
| CB2-1422 | 700.5 | 52295 | -9.94  | -2.95 | 25.32 |
| CB2-1423 | 701   | 52342 | -9.99  | -3.13 |       |
| CB2-1424 | 701.5 | 52390 | -10.06 | -3.39 | 24.89 |

|          |       |       |        |       |       |
|----------|-------|-------|--------|-------|-------|
| CB2-1425 | 702   | 52438 | -9.7   | -3.15 |       |
| CB2-1426 | 702.5 | 52485 | -10.01 | -3.05 | 27.22 |
| CB2-1427 | 703   | 52533 | -10.2  | -3.11 |       |
| CB2-1428 | 703.5 | 52580 | -10.4  | -3.57 | 24.8  |
| CB2-1429 | 704   | 52627 | -10.39 | -3.15 |       |
| CB2-1430 | 704.5 | 52675 | -10.35 | -3.2  | 23.28 |
| CB2-1431 | 705   | 52721 | -10.35 | -3.02 |       |
| CB2-1432 | 705.5 | 52768 | -10.24 | -3.28 | 27.01 |
| CB2-1433 | 706   | 52814 | -10    | -3.15 |       |
| CB2-1434 | 706.5 | 52860 | -10.13 | -3.05 | 26.64 |
| CB2-1435 | 707   | 52906 | -10.19 | -3.17 |       |
| CB2-1436 | 707.5 | 52951 | -10.46 | -3.6  | 26.7  |
| CB2-1437 | 708   | 52996 | -10.37 | -3.07 |       |
| CB2-1438 | 708.5 | 53041 | -10.32 | -3.21 | 26.83 |
| CB2-1439 | 709   | 53085 | -10.31 | -3.09 |       |
| CB2-1440 | 709.5 | 53130 | -10.33 | -3.27 | 27.29 |
| CB2-1441 | 710   | 53175 | -10.22 | -2.99 |       |
| CB2-1442 | 710.5 | 53220 | -10.33 | -3.17 | 26.26 |
| CB2-1443 | 711   | 53267 | -10.13 | -3.19 |       |
| CB2-1444 | 711.5 | 53314 | -10.05 | -3.53 | 30.7  |
| CB2-1445 | 712   | 53361 | -10.17 | -3.21 |       |
| CB2-1446 | 712.5 | 53409 | -10.37 | -3.08 | 27.29 |
| CB2-1447 | 713   | 53457 | -10.3  | -3.12 |       |
| CB2-1448 | 713.5 | 53506 | -10.2  | -3.36 | 26.62 |
| CB2-1449 | 714   | 53554 | -10.1  | -2.99 |       |
| CB2-1450 | 714.5 | 53603 | -10.02 | -2.97 | 29.2  |
| CB2-1451 | 715   | 53653 | -10.11 | -2.92 |       |
| CB2-1452 | 715.5 | 53702 | -10.52 | -3.3  | 27.16 |
| CB2-1453 | 716   | 53752 | -10.42 | -3.11 |       |
| CB2-1454 | 716.5 | 53801 | -10.44 | -3.15 | 25.68 |
| CB2-1455 | 717   | 53851 | -10.41 | -3.24 |       |
| CB2-1456 | 717.5 | 53900 | -10.49 | -3.54 | 27.17 |
| CB2-1457 | 718   | 53950 | -10.5  | -3.16 |       |
| CB2-1458 | 718.5 | 53999 | -10.43 | -3.11 | 28.66 |
| CB2-1459 | 719   | 54048 | -10.37 | -3.05 |       |
| CB2-1460 | 719.5 | 54096 | -10.41 | -3.22 | 28.55 |

|          |       |       |        |       |       |
|----------|-------|-------|--------|-------|-------|
| CB2-1461 | 720   | 54145 | -10.36 | -3.01 |       |
| CB2-1462 | 720.5 | 54193 | -10.44 | -2.93 | 26.17 |
| CB2-1463 | 721   | 54240 | -10.4  | -2.92 |       |
| CB2-1464 | 721.5 | 54287 | -10.53 | -3.02 | 26.57 |
| CB2-1465 | 722   | 54334 | -10.07 | -2.92 |       |
| CB2-1466 | 722.5 | 54380 | -10.29 | -2.83 | 28.39 |
| CB2-1467 | 723   | 54425 | -10.68 | -3.12 |       |
| CB2-1468 | 723.5 | 54470 | -10.74 | -3.55 | 27.93 |
| CB2-1469 | 724   | 54514 | -11.04 | -3.37 |       |
| CB2-1470 | 724.5 | 54557 | -11.1  | -3.37 | 20.28 |
| CB2-1471 | 725   | 54599 | -11.22 | -3.22 |       |
| CB2-1472 | 725.5 | 54640 | -10.99 | -3.39 | 21.24 |
| CB2-1473 | 726   | 54681 | -10.61 | -3.49 |       |
| CB2-1474 | 726.5 | 54720 | -10.69 | -3.51 | 24.63 |
| CB2-1475 | 727   | 54758 | -10.93 | -3.63 |       |
| CB2-1476 | 727.5 | 54796 | -10.87 | -3.71 | 26.58 |
| CB2-1477 | 728   | 54832 | -10.92 | -3.45 |       |
| CB2-1478 | 728.5 | 54867 | -10.82 | -3.53 | 26.89 |
| CB2-1479 | 729   | 54900 | -11.12 | -3.64 |       |
| CB2-1480 | 729.5 | 54933 | -11.24 | -3.73 | 25.22 |
| CB2-1481 | 730   | 54964 | -11.41 | -3.62 |       |
| CB2-1482 | 730.5 | 54994 | -11.29 | -3.48 | 19.86 |
| CB2-1483 | 731   | 55024 | -11.1  | -3.4  |       |
| CB2-1484 | 731.5 | 55053 | -10.92 | -3.53 | 28.25 |
| CB2-1485 | 732   | 55082 | -11    | -3.4  |       |
| CB2-1486 | 732.5 | 55111 | -10.95 | -3.33 | 25.88 |
| CB2-1487 | 733   | 55139 | -10.79 | -3.25 |       |
| CB2-1488 | 733.5 | 55168 | -10.81 | -3.45 | 26.81 |
| CB2-1489 | 734   | 55196 | -10.69 | -3.26 |       |
| CB2-1490 | 734.5 | 55223 | -10.71 | -3.32 | 26.78 |
| CB2-1491 | 735   | 55251 | -10.72 | -3.2  |       |
| CB2-1492 | 735.5 | 55278 | -10.91 | -3.39 | 26.75 |
| CB2-1493 | 736   | 55305 | -10.69 | -2.93 |       |
| CB2-1494 | 736.5 | 55332 | -10.48 | -2.98 | 28.83 |
| CB2-1495 | 737   | 55359 | -10.63 | -2.91 |       |
| CB2-1496 | 737.5 | 55385 | -10.54 | -3.03 | 27.79 |

|          |       |       |        |       |       |
|----------|-------|-------|--------|-------|-------|
| CB2-1497 | 738   | 55411 | -10.62 | -3    |       |
| CB2-1498 | 738.5 | 55438 | -10.65 | -3.09 | 25.28 |
| CB2-1499 | 739   | 55464 | -10.3  | -2.98 |       |
| CB2-1500 | 739.5 | 55489 | -10.29 | -3.26 | 30.18 |
| CB2-1501 | 740   | 55515 | -10.34 | -3.3  |       |
| CB2-1502 | 740.5 | 55541 |        |       | 28.84 |
| CB2-1503 | 741   | 55566 | -10.9  | -3.22 |       |
| CB2-1504 | 741.5 | 55592 | -11.04 | -3.47 | 24.32 |
| CB2-1505 | 742   | 55617 | -11.1  | -3.33 |       |
| CB2-1506 | 742.5 | 55643 | -10.84 | -3.11 | 27.01 |
| CB2-1507 | 743   | 55668 | -10.6  | -3.14 |       |
| CB2-1508 | 743.5 | 55693 | -10.34 | -3.18 | 30.93 |
| CB2-1509 | 744   | 55719 | -10.33 | -3.01 |       |
| CB2-1510 | 744.5 | 55744 | -10.19 | -3.17 | 30.06 |
| CB2-1511 | 745   | 55769 | -10.26 | -3.07 |       |
| CB2-1512 | 745.5 | 55795 | -10.4  | -3.43 | 29.2  |
| CB2-1513 | 746   | 55820 | -10.39 | -3.07 |       |
| CB2-1514 | 746.5 | 55846 | -10.15 | -3.08 | 28.43 |
| CB2-1515 | 747   | 55871 | -10.2  | -3.38 |       |
| CB2-1516 | 747.5 | 55897 | -10.41 | -3.49 | 25.96 |
| CB2-1517 | 748   | 55923 | -10.24 | -3.37 |       |
| CB2-1518 | 748.5 | 55948 | -9.93  | -3.06 | 30.68 |
| CB2-1519 | 749   | 55974 | -10.02 | -3.15 |       |
| CB2-1520 | 749.5 | 56000 | -10.03 | -3.26 | 32.8  |
| CB2-1521 | 750   | 56027 | -9.94  | -2.88 |       |
| CB2-1522 | 750.5 | 56053 | -10.15 | -3.19 | 25.5  |
| CB2-1523 | 751   | 56080 | -10.08 | -3.12 |       |
| CB2-1524 | 751.5 | 56106 | -10.46 | -3.57 | 23.15 |
| CB2-1525 | 752   | 56133 | -10.31 | -3.18 |       |
| CB2-1526 | 752.5 | 56160 | -10.11 | -3.08 |       |
| CB2-1527 | 753   | 56188 | -10.01 | -3.01 |       |
| CB2-1528 | 753.5 | 56215 | -9.98  | -3.38 | 26.99 |
| CB2-1529 | 754   | 56243 | -9.95  | -2.97 |       |
| CB2-1530 | 754.5 | 56272 | -9.75  | -3.06 | 28.25 |
| CB2-1531 | 755   | 56301 | -9.7   | -3.2  |       |
| CB2-1532 | 755.5 | 56332 | -9.6   | -3.49 | 28.68 |

|          |       |       |       |       |       |
|----------|-------|-------|-------|-------|-------|
| CB2-1533 | 756   | 56364 | -9.53 | -3.09 |       |
| CB2-1534 | 756.5 | 56397 | -9.4  | -3.2  | 29.26 |
| CB2-1535 | 757   | 56431 | -9.48 | -3.28 |       |
| CB2-1536 | 757.5 | 56467 | -9.37 | -3.37 | 28.84 |
| CB2-1537 | 758   | 56503 | -9.21 | -3.08 |       |
| CB2-1538 | 758.5 | 56540 |       |       | 26.66 |
| CB2-1539 | 759   | 56578 | -9.28 | -3.05 |       |
| CB2-1540 | 759.5 | 56617 | -9.48 | -3.78 | 26.81 |
| CB2-1541 | 760   | 56657 | -9.32 | -3.41 |       |
| CB2-1542 | 760.5 | 56698 |       |       | 26    |
| CB2-1543 | 761   | 56739 | -9.41 | -3.55 |       |
| CB2-1544 | 761.5 | 56782 | -9.51 | -3.96 | 24.15 |
| CB2-1545 | 762   | 56825 | -9.46 | -3.44 |       |
| CB2-1546 | 762.5 | 56869 | -9.59 | -3.51 | 26.23 |
| CB2-1547 | 763   | 56913 | -9.18 | -3.16 |       |
| CB2-1548 | 763.5 | 56958 | -8.93 | -3.31 | 28.68 |
| CB2-1549 | 764   | 57004 | -9.35 | -3.47 |       |
| CB2-1550 | 764.5 | 57050 | -9.31 | -3.22 | 23.28 |
| CB2-1551 | 765   | 57097 | -9.22 | -3.26 |       |
| CB2-1552 | 765.5 | 57145 | -9.35 | -3.62 | 27.25 |
| CB2-1553 | 766   | 57193 | -9.05 | -3.27 |       |
| CB2-1554 | 766.5 | 57241 | -9.05 | -3.18 | 24.07 |
| CB2-1555 | 767   | 57290 | -8.79 | -3.2  |       |
| CB2-1556 | 767.5 | 57340 | -8.85 | -3.83 | 26.98 |
| CB2-1557 | 768   | 57389 | -8.79 | -3.34 |       |
| CB2-1558 | 768.5 | 57440 | -8.94 | -3.48 | 23.8  |
| CB2-1559 | 769   | 57490 | -8.94 | -3.34 |       |
| CB2-1560 | 769.5 | 57541 | -8.73 | -3.26 | 27.69 |
| CB2-1561 | 770   | 57592 | -8.79 | -3.01 |       |
| CB2-1562 | 770.5 | 57643 | -8.76 | -2.84 | 29.12 |
| CB2-1563 | 771   | 57694 | -8.78 | -3.03 |       |
| CB2-1564 | 771.5 | 57746 | -8.83 | -3.36 | 29.33 |
| CB2-1565 | 772   | 57798 | -8.73 | -2.81 |       |
| CB2-1566 | 772.5 | 57849 | -8.58 | -2.89 | 28.42 |
| CB2-1567 | 773   | 57901 | -8.48 | -2.89 |       |
| CB2-1568 | 773.5 | 57953 |       |       | 27.84 |

|          |       |       |       |       |       |
|----------|-------|-------|-------|-------|-------|
| CB2-1569 | 774   | 58005 | -8.54 | -2.97 |       |
| CB2-1570 | 774.5 | 58057 | -8.3  | -2.87 | 27.16 |
| CB2-1571 | 775   | 58109 | -8.32 | -2.87 |       |
| CB2-1572 | 775.5 | 58161 | -8.41 | -3.03 | 30.62 |
| CB2-1573 | 776   | 58213 | -8.29 | -2.6  |       |
| CB2-1574 | 776.5 | 58264 | -8.41 | -2.69 | 31.65 |
| CB2-1575 | 777   | 58316 | -8.69 | -2.96 |       |
| CB2-1576 | 777.5 | 58367 | -8.72 | -3.29 | 33.01 |
| CB2-1577 | 778   | 58418 | -8.65 | -2.95 |       |
| CB2-1578 | 778.5 | 58469 | -8.61 | -2.89 |       |

**Table S3:** CB2 Speleothem proxies. Every 32 samples of unknown composition were analyzed with 14 standards which included a mix of NBS-18, IAEA-CO-1, and an in-house standard for  $\delta^{18}\text{O}$  and  $\delta^{13}\text{C}$ . The analytical precision for  $\delta^{18}\text{O}$  and  $\delta^{13}\text{C}$  is 0.08‰ and 0.05‰, respectively. Mg/Ca ratios were calculated from the intensity ratios using a bracketing technique with five standards of known concentration and an internal standard (Ge) added to all samples to correct for instrumental drift. Trace element analysis of CB2 serves to complement the interpretation of speleothem  $\delta^{18}\text{O}$  and  $\delta^{13}\text{C}$ ; therefore, only every other sample was analyzed.
